# Supplementary material for: The molecular architecture of the Dam1 kinetochore complex is defined by cross-linking based structural modelling
Source: PubMed Central journal article supplement (PMC4660060; doi:10.1038/ncomms9673), 2015-11-12
Supplement: ncomms9673-s1.pdf [file ncomms9673-s1.pdf]

## Supplementary Information:

### Supplementary Figures

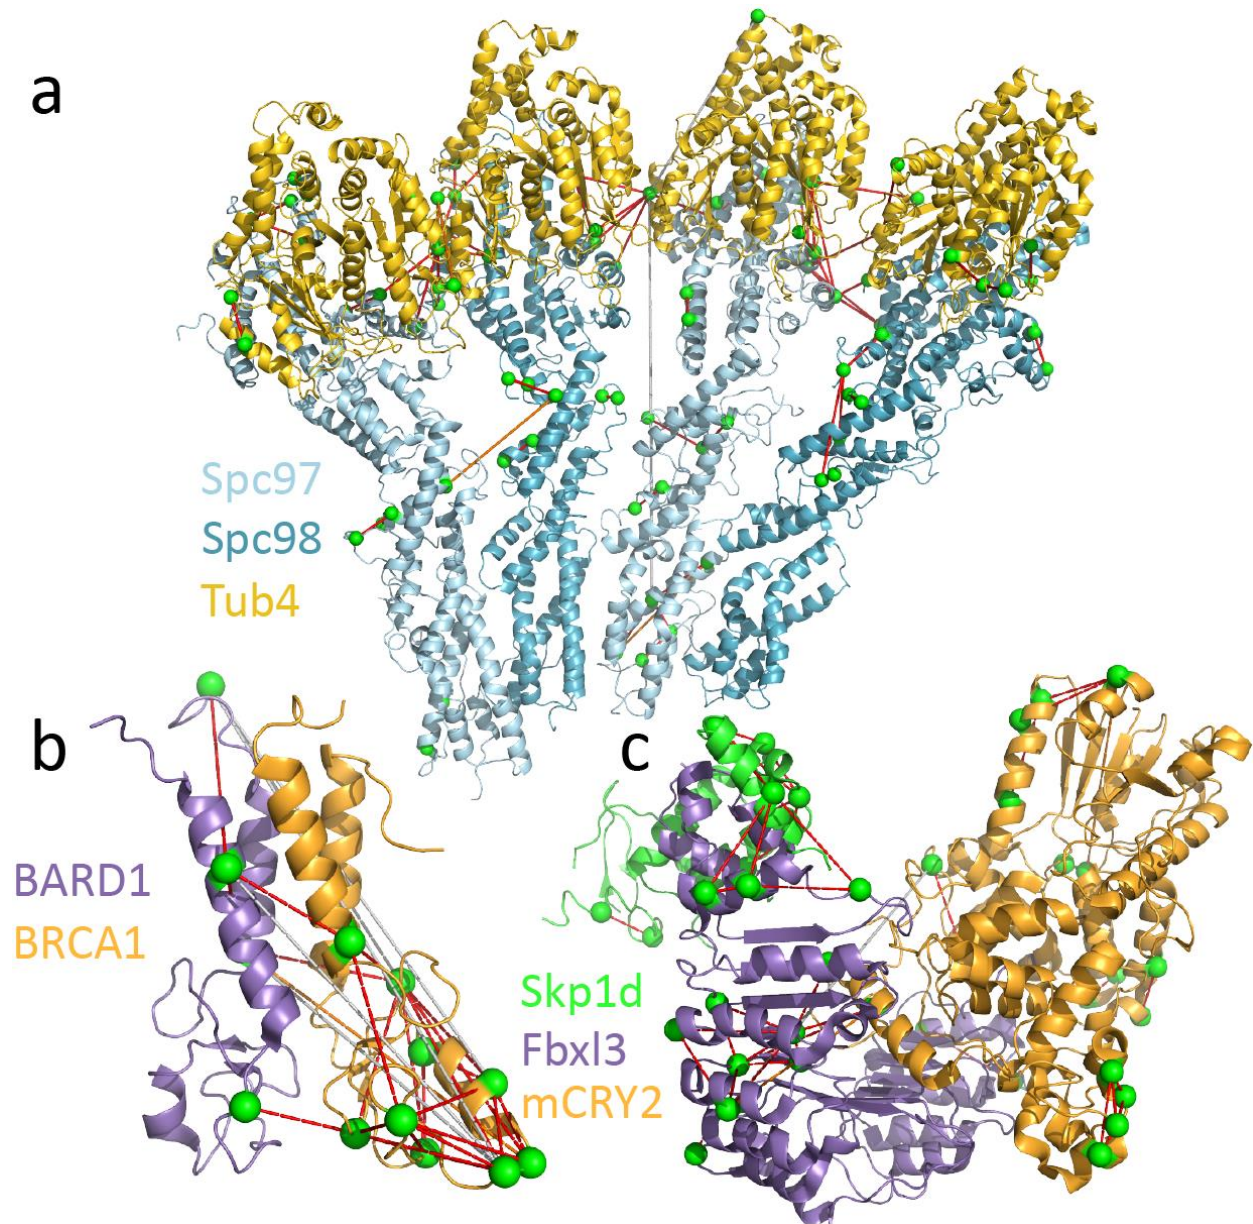

**Supplementary Figure 1: Cross-linking data plotted on available structures.** (a) Pseudo-atomic structure of the  $\gamma$ -TuSC; (b) Atomic structure of the BRCA1/BARD1 heterodimer; (c) Atomic structure of the SCF<sup>FBXL3</sup> complex. Lines representing cross-links and loop-links are: red (C $\alpha$ -C $\alpha$  distance <30 Å); orange (C $\alpha$ -C $\alpha$  distance 30 to 40 Å); and grey (C $\alpha$ -C $\alpha$  distance >40 Å). Cross-linked lysine  $\alpha$ -carbons are depicted as green spheres. Data is shown for peptides with Percolator<sup>1</sup> assigned  $q$  values  $\leq 0.01$ .

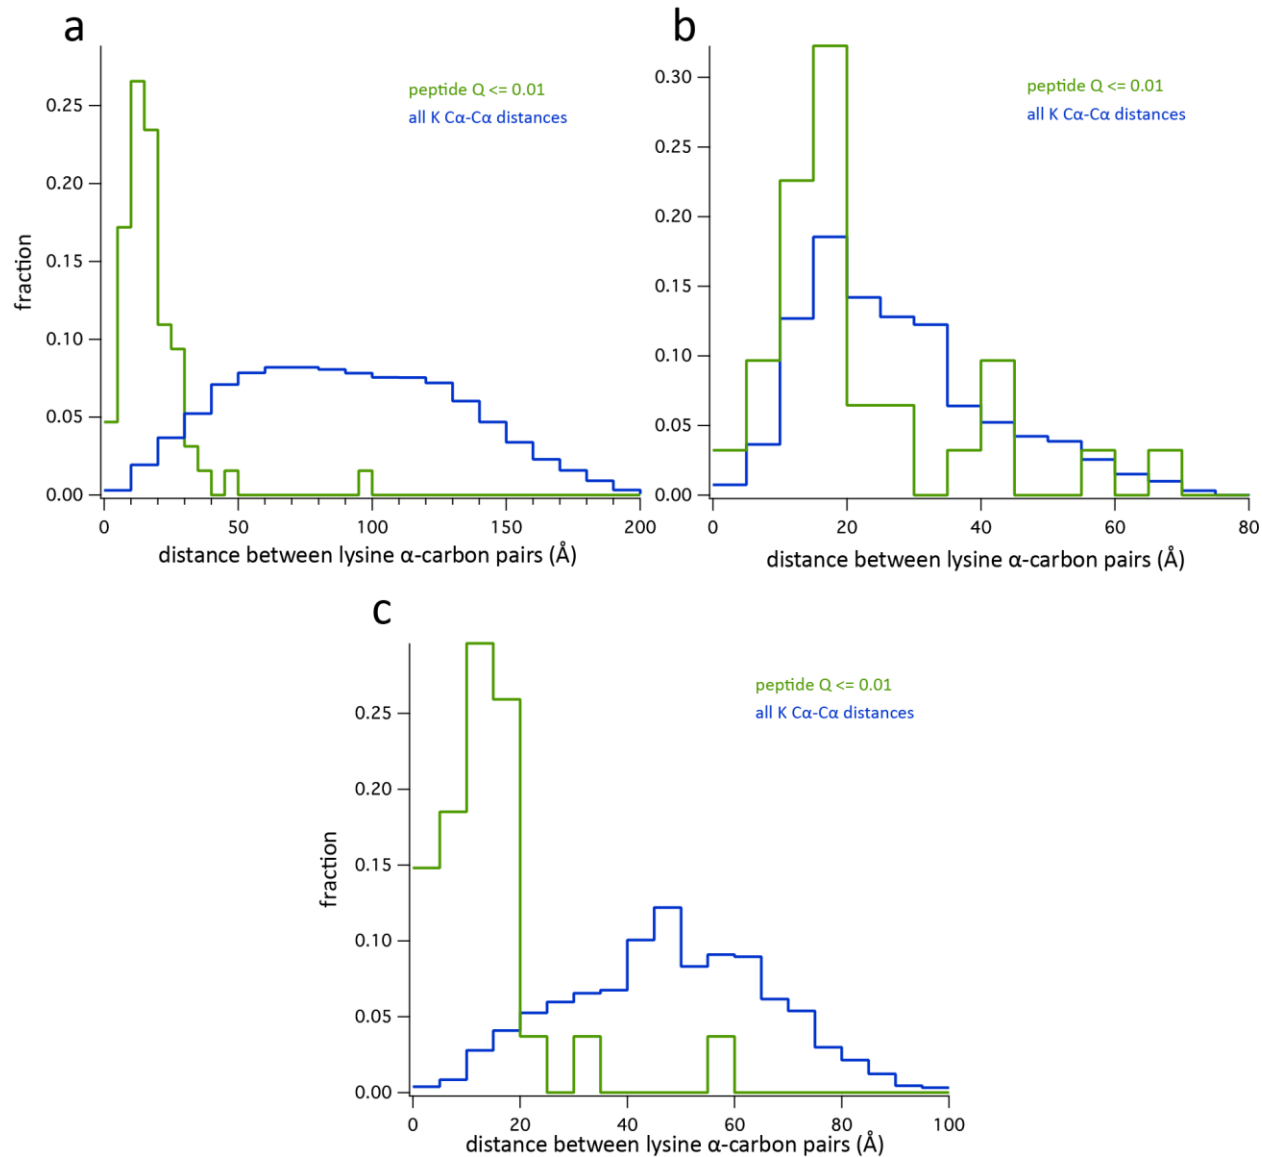

**Supplementary Figure 2: Cross-linking method benchmarking.** Histograms of lysine  $\alpha$ - $\alpha$  distances observed cross-linked together versus all possible pairs of lysine  $\alpha$ - $\alpha$  distances based on atomic structures. Data is shown for peptides with Percolator<sup>1</sup> assigned  $q$  values  $\leq 0.01$ . (a)  $\gamma$ -TuSC; (b) BRCA1/BARD1; and (c) SCF<sup>FBXL3</sup>. Hits to peptides not present in reference PDBs are not shown.

a

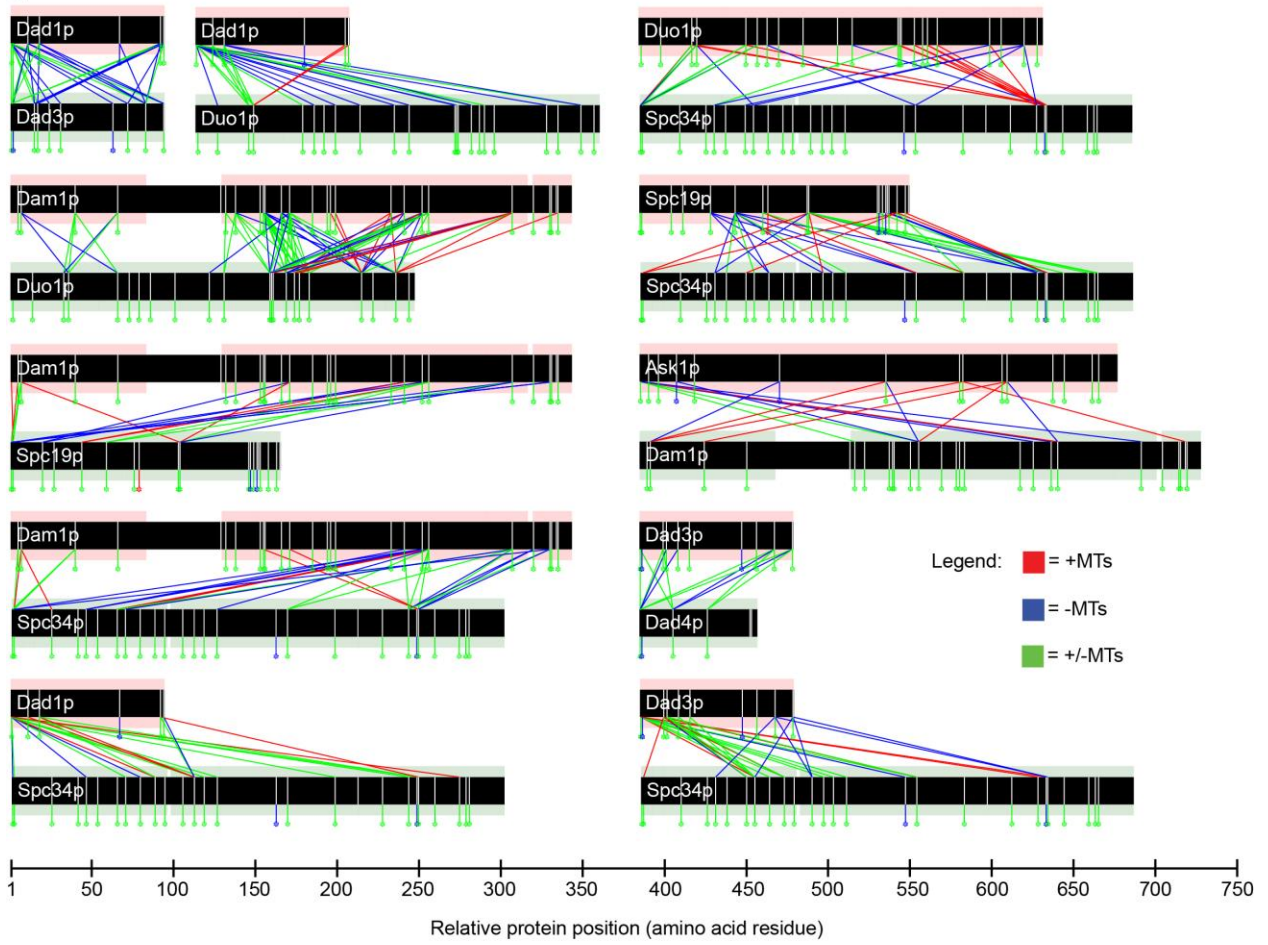

**b**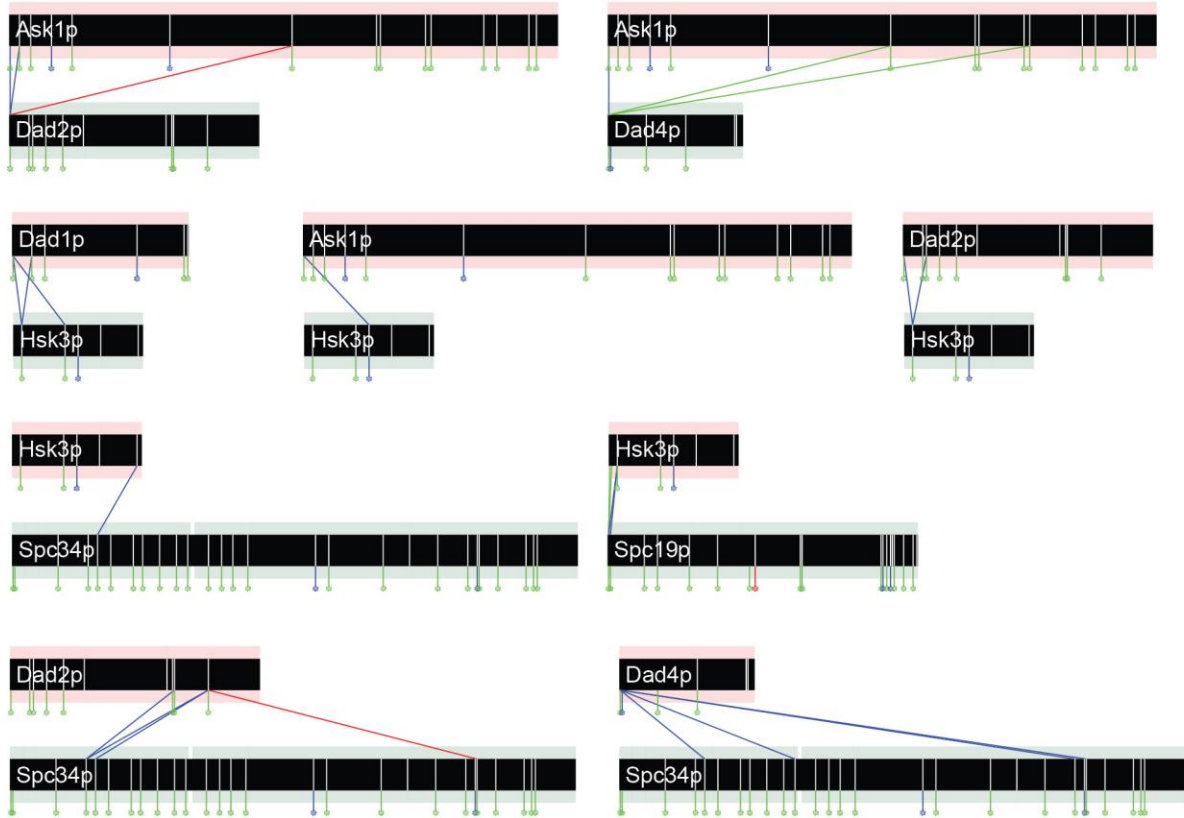**c**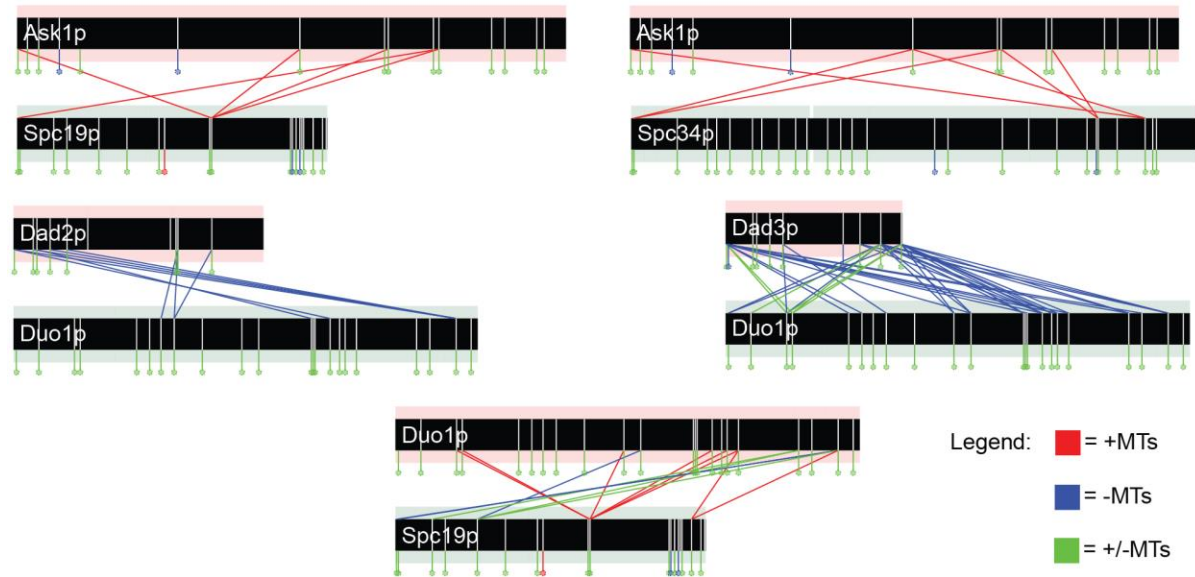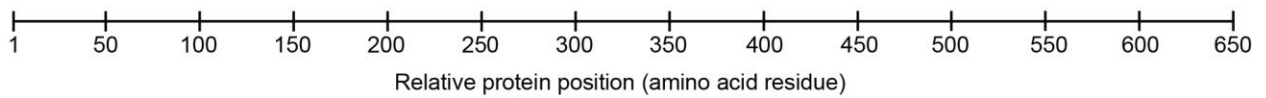

Legend: ■ = +MTs  
■ = -MTs  
■ = +/-MTs

**Supplementary Figure 3: Dam1 complex cross-links observed in the presence and absence of microtubules.** (a) Protein pairs with multiple cross-links detected in the presence and absence of microtubules. (b) Protein pairs exhibiting minimal cross-links. (c) Protein pairs showing different cross-links in the presence and absence of microtubules. Peptide sequence coverage (colored boxes), mono-links (colored vertical lines and circles) and lysines (vertical white lines) are also shown. Red lines represent cross-links found only in the presence of microtubules. Blue lines represent cross-links found only in the absence of microtubules. Green lines represent cross-links found both in the presence and absence of microtubules. Data is shown for peptides with Percolator<sup>1</sup> assigned  $q$  values  $\leq 0.01$ .

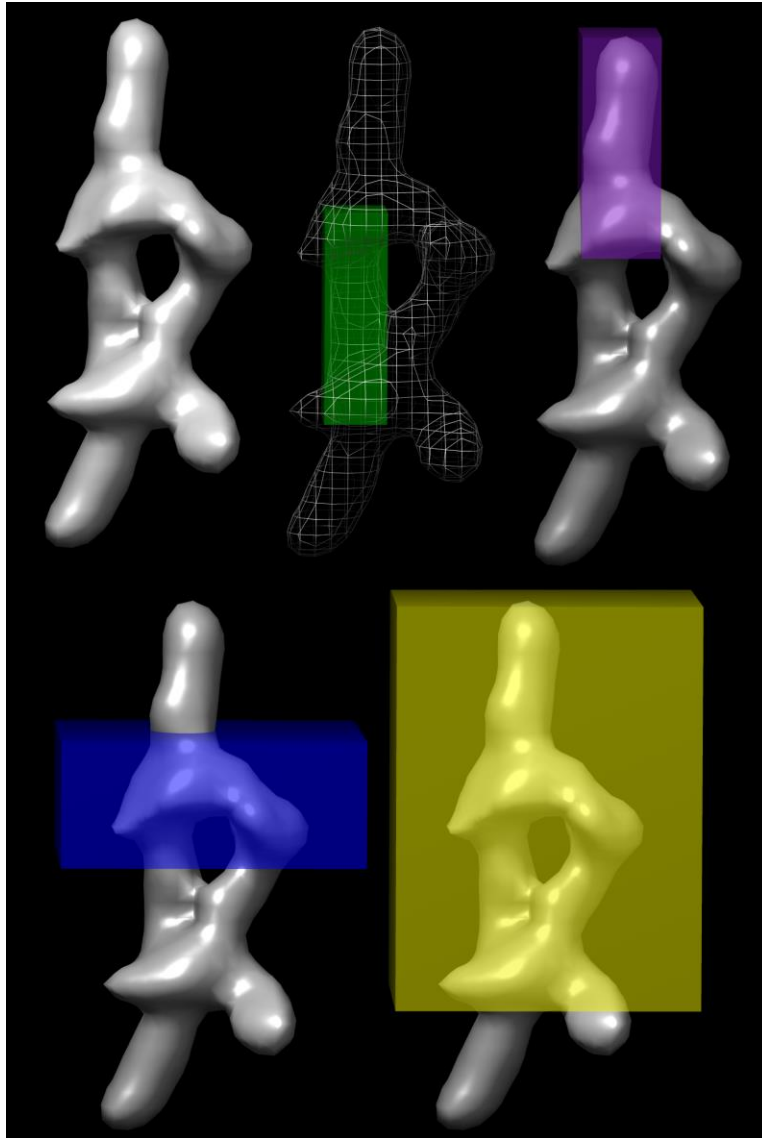

**Supplementary Figure 4: Previously published EM localization data was converted into bounding boxes, which were used as restraints during modeling.** For orientation, the Dam1 EM structure (EMDB #1373) is shown top left in grey (not used in the modeling). Ask1p/Spc19p (green), Dam1p/Duo1p (blue), Spc34p (purple) and “no localization” (gold) boxes are shown. Boxes apply to a single Dam1 monomer (the upper portion of the structure depicted). The boxes used were purposefully larger than the EM localization data to account for the location of whole proteins rather than the individual protein termini that were localized in the published study. Models run using localization data made use of the blue, green and purple boxes to constrain their respective proteins. All other proteins were constrained to the gold box. We did not apply a hard constraint, but allowed each component to extend beyond its pre-assigned bounding box to satisfy our cross-linking data. This was implemented by using harmonic restraints on the distance between the center of each bead and the wall of the bounding box, acting only when a bead exited the box. In principle, each restrained Dam1 component can extend outside its bounding box by any given amount, provided that the violation of the bounding box restraint is balanced by the satisfaction of a sufficient number of cross-linking restraints.

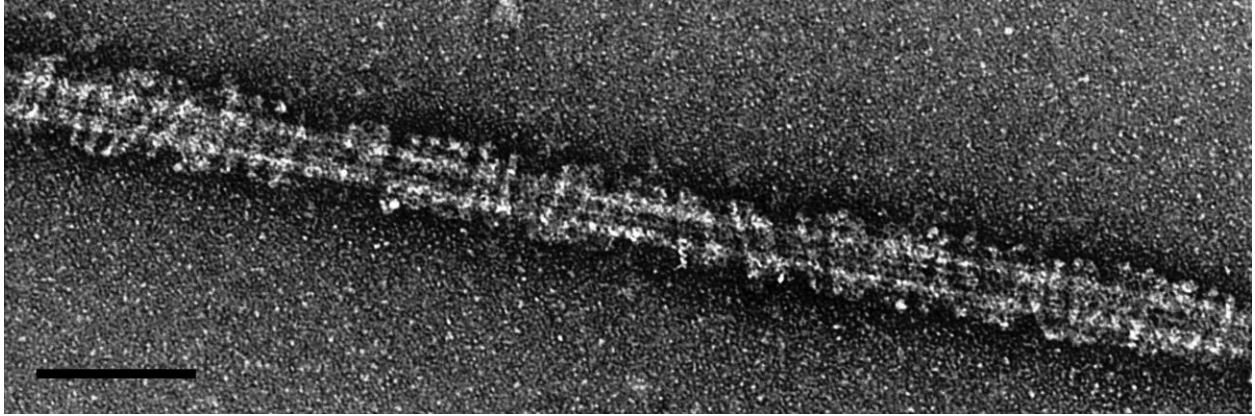

**Supplementary Figure 5: Negative stain EM image of Dam1 complex cross-linked to microtubules.**  
Scale bar is 100 nm.

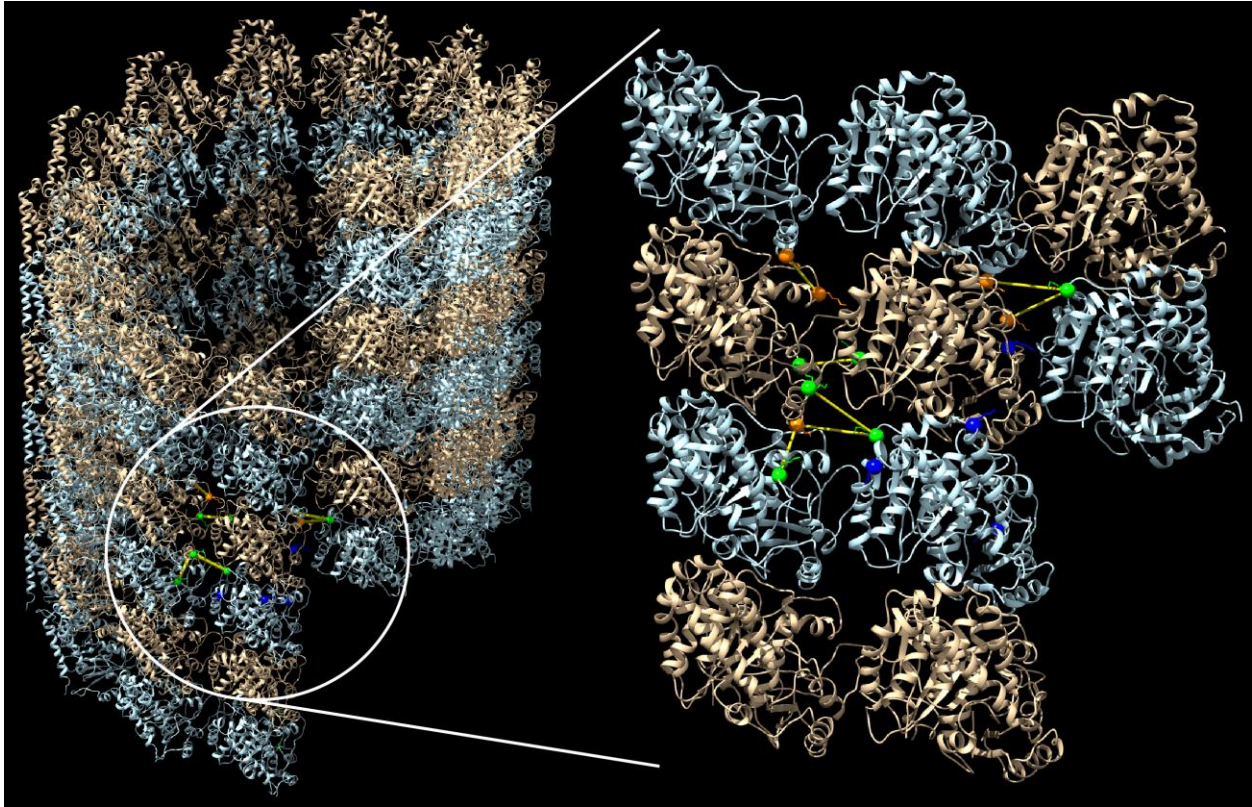

**Supplementary Figure 6: Pseudo-atomic structure of a microtubule with tubulin to tubulin cross-links depicted in yellow.** All cross-linked C $\alpha$ -C $\alpha$  distance are less than 30 Å. Cross-linked lysine  $\alpha$ -carbons are depicted as spheres. Green spheres were observed in tubulin to tubulin cross-links only. Blue spheres were observed in tubulin to Dam1 complex cross-links only. Orange spheres were observed in both tubulin to tubulin cross-links and tubulin to Dam1 complex cross-links. Alpha-tubulin is colored light blue. Beta-tubulin is colored copper. Data is shown for peptides with Percolator<sup>1</sup> assigned  $q$  values  $\leq$  0.01.



## Supplementary Tables:

**Supplementary Table 1: The number and structural agreement of unique distance restraints identified in three protein complexes used to benchmark Kojak.**

| Complex name                     | ~Size (kDa) | Num. of subunits in complex | Number of linkable sites* | Linkable sites observed modified by cross-linker | Number of unique distance restraint identifications | Number of identifications present in pdb structure | Number with C $\alpha$ -C $\alpha$ distance within 30 Å | Agreement with structure |
|----------------------------------|-------------|-----------------------------|---------------------------|--------------------------------------------------|-----------------------------------------------------|----------------------------------------------------|---------------------------------------------------------|--------------------------|
| $\gamma$ -TuSC <sup>†</sup>      | 300         | 4                           | 132                       | 69%                                              | 129                                                 | 70                                                 | 64                                                      | 91%                      |
| BRCA1/BARD 1 <sup>†</sup>        | 27          | 2                           | 25                        | 88%                                              | 57                                                  | 31                                                 | 25                                                      | 81%                      |
| SCF(FBXL3) <sup>†</sup>          | 120         | 3                           | 66                        | 85%                                              | 67                                                  | 51                                                 | 48                                                      | 94%                      |
| Dam1c (minus MTs)                | 200         | 10                          | 154                       | 94%                                              | 678                                                 | n/a                                                | n/a                                                     | n/a                      |
| Dam1c (plus MTs)                 | 200         | 10                          | 154                       | 90%                                              | 458                                                 | n/a                                                | n/a                                                     | n/a                      |
| Dam1c (plus & minus MT combined) | 200         | 10                          | 154                       | 94%                                              | 814                                                 | n/a                                                | n/a                                                     | n/a                      |

\*Theoretical linkable sites include all lysines plus the N-terminal amino acid of each protein; <sup>†</sup>Unlabeled data only; MT = microtubule; Dam1c = Dam1 complex.

**Supplementary Table 2: Unique distance constraints within the  $\gamma$ -TuSC found at 1% FDR. Source data for Supplementary Figure 1a.**

| Type | Protein 1 | Pos | Protein 2 | Pos | Num PSMs | Num Peptides | Num Unique Peptides | Best Peptide Q-Value | C $\alpha$ -C $\alpha$ distance if available |
|------|-----------|-----|-----------|-----|----------|--------------|---------------------|----------------------|----------------------------------------------|
| XL   | Spc97p    | 24  | Spc97p    | 39  | 5        | 1            | 1                   | 0.002                | -                                            |
| XL   | Spc97p    | 24  | Spc97p    | 125 | 4        | 1            | 1                   | 0.001                | -                                            |
| XL   | Spc97p    | 37  | Spc97p    | 45  | 6        | 1            | 1                   | 0.002                | -                                            |
| XL   | Spc97p    | 37  | Spc97p    | 93  | 3        | 1            | 1                   | 0.002                | -                                            |
| XL   | Spc97p    | 37  | Spc97p    | 97  | 4        | 1            | 1                   | 0.001                | -                                            |
| XL   | Spc97p    | 39  | Spc97p    | 93  | 5        | 1            | 1                   | 0.001                | -                                            |
| XL   | Spc97p    | 39  | Spc97p    | 97  | 11       | 1            | 1                   | 0.001                | -                                            |
| XL   | Spc97p    | 45  | Spc97p    | 93  | 3        | 1            | 1                   | 0.002                | -                                            |
| XL   | Spc97p    | 45  | Spc97p    | 97  | 12       | 1            | 1                   | 0.002                | -                                            |
| XL   | Spc97p    | 45  | Spc97p    | 103 | 6        | 1            | 1                   | 0.006                | -                                            |
| XL   | Spc97p    | 45  | Spc98p    | 103 | 7        | 1            | 1                   | 0.001                | -                                            |
| XL   | Spc97p    | 45  | Spc98p    | 107 | 30       | 1            | 1                   | 0                    | -                                            |
| XL   | Spc97p    | 93  | Spc97p    | 97  | 11       | 1            | 1                   | 0.002                | -                                            |
| XL   | Spc97p    | 93  | Spc97p    | 103 | 9        | 1            | 1                   | 0.002                | -                                            |
| XL   | Spc97p    | 93  | Spc97p    | 114 | 14       | 1            | 1                   | 0                    | -                                            |
| XL   | Spc97p    | 97  | Spc98p    | 103 | 2        | 1            | 1                   | 0.009                | -                                            |
| XL   | Spc97p    | 103 | Spc97p    | 114 | 6        | 1            | 1                   | 0.001                | -                                            |
| XL   | Spc97p    | 103 | Spc97p    | 125 | 1        | 1            | 1                   | 0.001                | -                                            |
| XL   | Spc97p    | 114 | Spc97p    | 125 | 1        | 1            | 1                   | 0.001                | -                                            |
| XL   | Spc97p    | 114 | Tub4p     | 370 | 3        | 1            | 1                   | 0.005                | -                                            |
| XL   | Spc97p    | 164 | Spc98p    | 40  | 3        | 1            | 1                   | 0.002                | -                                            |
| XL   | Spc97p    | 164 | Spc98p    | 71  | 8        | 1            | 1                   | 0                    | -                                            |
| XL   | Spc97p    | 164 | Spc98p    | 107 | 26       | 1            | 1                   | 0                    | -                                            |
| XL   | Spc97p    | 221 | Spc97p    | 328 | 7        | 1            | 1                   | 0                    | -                                            |
| XL   | Spc97p    | 221 | Spc97p    | 341 | 13       | 1            | 1                   | 0                    | -                                            |
| XL   | Spc97p    | 221 | Spc97p    | 346 | 1        | 1            | 1                   | 0.002                | -                                            |
| XL   | Spc97p    | 221 | Spc97p    | 537 | 5        | 1            | 1                   | 0.002                | -                                            |
| XL   | Spc97p    | 221 | Spc97p    | 581 | 2        | 1            | 1                   | 0.002                | -                                            |
| XL*  | Spc97p    | 328 | Spc97p    | 341 | 16       | 1            | 1                   | 0.001                | 17                                           |
| XL   | Spc97p    | 328 | Spc97p    | 346 | 6        | 1            | 1                   | 0.001                | 19                                           |

|    |        |     |        |     |    |   |   |       |    |
|----|--------|-----|--------|-----|----|---|---|-------|----|
| XL | Spc97p | 328 | Spc97p | 355 | 3  | 1 | 1 | 0.001 | 20 |
| XL | Spc97p | 355 | Spc98p | 709 | 9  | 1 | 1 | 0.003 | -  |
| XL | Spc97p | 355 | Spc98p | 712 | 9  | 1 | 1 | 0.002 | 34 |
| XL | Spc97p | 441 | Spc97p | 460 | 9  | 1 | 1 | 0     | 12 |
| XL | Spc97p | 441 | Tub4p  | 84  | 3  | 1 | 1 | 0.001 | 20 |
| XL | Spc97p | 441 | Tub4p  | 198 | 14 | 1 | 1 | 0.001 | 18 |
| XL | Spc97p | 441 | Tub4p  | 370 | 7  | 1 | 1 | 0.001 | 17 |
| XL | Spc97p | 448 | Spc97p | 460 | 13 | 1 | 1 | 0     | 16 |
| XL | Spc97p | 448 | Spc97p | 537 | 6  | 1 | 1 | 0.001 | -  |
| XL | Spc97p | 448 | Spc97p | 708 | 2  | 1 | 1 | 0.001 | 17 |
| XL | Spc97p | 448 | Spc97p | 711 | 2  | 1 | 1 | 0.009 | 22 |
| XL | Spc97p | 448 | Spc98p | 843 | 5  | 2 | 2 | 0.001 | 23 |
| XL | Spc97p | 448 | Tub4p  | 370 | 11 | 1 | 1 | 0.001 | 28 |
| XL | Spc97p | 460 | Spc97p | 537 | 1  | 1 | 1 | 0.001 | -  |
| XL | Spc97p | 460 | Spc98p | 831 | 5  | 1 | 1 | 0     | 9  |
| XL | Spc97p | 460 | Spc98p | 843 | 12 | 2 | 2 | 0     | 17 |
| XL | Spc97p | 460 | Tub4p  | 198 | 1  | 1 | 1 | 0.002 | 29 |
| XL | Spc97p | 460 | Tub4p  | 370 | 15 | 2 | 2 | 0     | 20 |
| XL | Spc97p | 537 | Spc97p | 554 | 1  | 1 | 1 | 0.007 | -  |
| XL | Spc97p | 537 | Spc97p | 708 | 3  | 1 | 1 | 0.001 | -  |
| XL | Spc97p | 537 | Spc97p | 716 | 9  | 1 | 1 | 0     | -  |
| XL | Spc97p | 537 | Spc97p | 734 | 3  | 1 | 1 | 0.001 | -  |
| XL | Spc97p | 537 | Spc97p | 777 | 3  | 1 | 1 | 0     | -  |
| XL | Spc97p | 537 | Spc98p | 831 | 7  | 1 | 1 | 0.001 | -  |
| XL | Spc97p | 537 | Spc98p | 843 | 4  | 2 | 2 | 0.001 | -  |
| XL | Spc97p | 537 | Tub4p  | 370 | 8  | 1 | 1 | 0.001 | -  |
| XL | Spc97p | 635 | Spc97p | 790 | 1  | 1 | 1 | 0     | 11 |
| XL | Spc97p | 708 | Spc97p | 716 | 10 | 1 | 1 | 0.001 | 14 |
| XL | Spc97p | 711 | Spc97p | 716 | 4  | 1 | 1 | 0.002 | 11 |
| XL | Spc97p | 716 | Spc97p | 734 | 11 | 1 | 1 | 0     | -  |
| XL | Spc97p | 727 | Spc97p | 734 | 10 | 1 | 1 | 0.001 | -  |
| XL | Spc97p | 734 | Tub4p  | 197 | 3  | 2 | 2 | 0     | -  |
| XL | Spc97p | 734 | Tub4p  | 198 | 4  | 1 | 1 | 0.001 | -  |
| XL | Spc97p | 734 | Tub4p  | 248 | 1  | 1 | 1 | 0     | -  |
| XL | Spc97p | 734 | Tub4p  | 370 | 5  | 1 | 1 | 0.005 | -  |
| XL | Spc97p | 734 | Tub4p  | 376 | 2  | 1 | 1 | 0.002 | -  |

|     |        |     |        |     |    |   |   |       |    |
|-----|--------|-----|--------|-----|----|---|---|-------|----|
| XL  | Spc97p | 790 | Tub4p  | 370 | 5  | 1 | 1 | 0     | 25 |
| XL  | Spc98p | 68  | Spc98p | 103 | 11 | 1 | 1 | 0     | -  |
| XL  | Spc98p | 71  | Spc98p | 103 | 8  | 1 | 1 | 0     | -  |
| XL  | Spc98p | 71  | Spc98p | 107 | 4  | 1 | 1 | 0     | -  |
| XL  | Spc98p | 103 | Spc98p | 103 | 1  | 1 | 1 | 0.001 | -  |
| XL  | Spc98p | 401 | Spc98p | 674 | 5  | 1 | 1 | 0.001 | 16 |
| XL  | Spc98p | 401 | Spc98p | 704 | 1  | 1 | 1 | 0.005 | -  |
| XL  | Spc98p | 401 | Spc98p | 709 | 2  | 2 | 2 | 0.007 | -  |
| XL  | Spc98p | 428 | Spc98p | 674 | 2  | 1 | 1 | 0.001 | 27 |
| XL  | Spc98p | 428 | Spc98p | 709 | 8  | 1 | 1 | 0.001 | -  |
| XL  | Spc98p | 495 | Tub4p  | 198 | 2  | 1 | 1 | 0     | 21 |
| XL  | Spc98p | 495 | Tub4p  | 370 | 3  | 1 | 1 | 0.001 | 19 |
| XL  | Spc98p | 511 | Tub4p  | 370 | 1  | 1 | 1 | 0.002 | 23 |
| XL  | Spc98p | 602 | Tub4p  | 198 | 5  | 1 | 1 | 0.001 | 17 |
| XL  | Spc98p | 630 | Spc98p | 810 | 6  | 1 | 1 | 0     | 12 |
| XL  | Spc98p | 647 | Spc98p | 820 | 6  | 1 | 1 | 0.001 | 15 |
| XL  | Spc98p | 647 | Tub4p  | 370 | 2  | 1 | 1 | 0.002 | 15 |
| XL  | Spc98p | 662 | Spc98p | 674 | 3  | 1 | 1 | 0     | 13 |
| XL  | Spc98p | 674 | Spc98p | 698 | 6  | 1 | 1 | 0     | -  |
| XL  | Spc98p | 674 | Spc98p | 704 | 13 | 1 | 1 | 0     | -  |
| XL  | Spc98p | 674 | Spc98p | 709 | 8  | 2 | 2 | 0.001 | -  |
| XL  | Spc98p | 674 | Spc98p | 712 | 7  | 1 | 1 | 0.001 | 13 |
| XL  | Spc98p | 674 | Spc98p | 717 | 6  | 1 | 1 | 0     | 5  |
| XL  | Spc98p | 698 | Spc98p | 709 | 8  | 1 | 1 | 0.001 | -  |
| XL* | Spc98p | 704 | Spc98p | 712 | 5  | 1 | 1 | 0.006 | -  |
| XL* | Spc98p | 709 | Spc98p | 717 | 1  | 1 | 1 | 0.001 | -  |
| XL  | Spc98p | 831 | Tub4p  | 370 | 1  | 1 | 1 | 0.002 | 11 |
| XL  | Spc98p | 843 | Tub4p  | 370 | 25 | 2 | 2 | 0     | 28 |
| XL  | Spc98p | 843 | Tub4p  | 376 | 13 | 2 | 2 | 0     | 33 |
| XL  | Tub4p  | 84  | Tub4p  | 94  | 9  | 2 | 2 | 0.002 | 11 |
| XL  | Tub4p  | 84  | Tub4p  | 370 | 5  | 2 | 2 | 0.005 | 22 |
| XL  | Tub4p  | 94  | Tub4p  | 376 | 1  | 1 | 1 | 0     | 36 |
| XL  | Tub4p  | 198 | Tub4p  | 370 | 4  | 1 | 1 | 0     | 19 |
| XL  | Tub4p  | 198 | Tub4p  | 376 | 1  | 1 | 1 | 0.002 | 26 |
| XL  | Tub4p  | 248 | Tub4p  | 370 | 1  | 1 | 1 | 0     | 30 |
| XL  | Tub4p  | 370 | Tub4p  | 376 | 20 | 1 | 1 | 0     | 12 |

|     |        |     |        |     |    |   |   |       |    |
|-----|--------|-----|--------|-----|----|---|---|-------|----|
| XL  | Tub4p  | 370 | Tub4p  | 433 | 3  | 1 | 1 | 0     | 50 |
| LL  | Spc97p | 24  | Spc97p | 37  | 2  | 1 | 1 | 0.002 | -  |
| LL  | Spc97p | 37  | Spc97p | 39  | 11 | 1 | 1 | 0     | -  |
| LL  | Spc97p | 39  | Spc97p | 45  | 7  | 1 | 1 | 0.002 | -  |
| LL  | Spc97p | 93  | Spc97p | 96  | 16 | 1 | 1 | 0     | 10 |
| LL  | Spc97p | 96  | Spc97p | 97  | 7  | 2 | 2 | 0.001 | 4  |
| LL  | Spc97p | 249 | Spc97p | 254 | 4  | 1 | 1 | 0.001 | 8  |
| LL* | Spc97p | 328 | Spc97p | 341 | 2  | 1 | 1 | 0.008 | 17 |
| LL  | Spc97p | 341 | Spc97p | 346 | 2  | 1 | 1 | 0.001 | 10 |
| LL  | Spc97p | 441 | Spc97p | 448 | 1  | 1 | 1 | 0.009 | 14 |
| LL  | Spc97p | 608 | Spc97p | 613 | 4  | 1 | 1 | 0     | 8  |
| LL  | Spc97p | 654 | Spc97p | 661 | 17 | 1 | 1 | 0     | 10 |
| LL  | Spc97p | 729 | Spc97p | 734 | 6  | 1 | 1 | 0.001 | -  |
| LL  | Spc97p | 777 | Spc97p | 790 | 9  | 1 | 1 | 0     | 19 |
| LL  | Spc98p | 103 | Spc98p | 107 | 16 | 1 | 1 | 0     | -  |
| LL  | Spc98p | 396 | Spc98p | 401 | 3  | 1 | 1 | 0.001 | 9  |
| LL  | Spc98p | 414 | Spc98p | 417 | 15 | 2 | 2 | 0     | 5  |
| LL  | Spc98p | 427 | Spc98p | 428 | 3  | 1 | 1 | 0     | 4  |
| LL  | Spc98p | 495 | Spc98p | 511 | 5  | 1 | 1 | 0.001 | 9  |
| LL  | Spc98p | 698 | Spc98p | 704 | 15 | 2 | 2 | 0     | -  |
| LL  | Spc98p | 704 | Spc98p | 709 | 20 | 1 | 1 | 0.001 | -  |
| LL* | Spc98p | 704 | Spc98p | 712 | 1  | 1 | 1 | 0.006 | -  |
| LL  | Spc98p | 709 | Spc98p | 712 | 19 | 2 | 2 | 0     | -  |
| LL* | Spc98p | 709 | Spc98p | 717 | 1  | 1 | 1 | 0.002 | -  |
| LL  | Spc98p | 712 | Spc98p | 717 | 1  | 1 | 1 | 0.002 | 9  |
| LL  | Spc98p | 804 | Spc98p | 810 | 2  | 1 | 1 | 0.001 | 10 |
| LL  | Spc98p | 810 | Spc98p | 817 | 1  | 1 | 1 | 0.005 | 9  |
| LL  | Tub4p  | 60  | Tub4p  | 84  | 1  | 1 | 1 | 0.005 | 13 |
| LL  | Tub4p  | 155 | Tub4p  | 158 | 9  | 3 | 3 | 0     | 5  |
| LL  | Tub4p  | 197 | Tub4p  | 198 | 34 | 3 | 3 | 0     | 4  |

**XL=cross-link; LL=loop-link; \*Identified as both a XL and a LL**

**Supplementary Table 3: BRCA1/BARD1 unique distance constraints found at 1% FDR.** Source data for Supplementary Figure 1b.

| Type | Protein 1 | Pos | Protein 2 | Pos | Num PSMs | Num Peptides | Num Unique Peptides | Best Peptide Q-Value | C $\alpha$ -C $\alpha$ distance if available |
|------|-----------|-----|-----------|-----|----------|--------------|---------------------|----------------------|----------------------------------------------|
| XL   | BRCA1     | 40  | BRCA1     | 85  | 1        | 1            | 1                   | 0.01                 | 20                                           |
| XL   | BRCA1     | 40  | BARD1     | 85  | 13       | 2            | 2                   | 0                    | 15                                           |
| XL   | BRCA1     | 40  | BARD1     | 99  | 7        | 1            | 1                   | 0.002                | -                                            |
| XL   | BRCA1     | 40  | BARD1     | 102 | 2        | 2            | 1                   | 0.004                | -                                            |
| XL   | BRCA1     | 40  | BARD1     | 105 | 11       | 4            | 4                   | 0                    | -                                            |
| XL   | BRCA1     | 52  | BRCA1     | 58  | 5        | 1            | 1                   | 0.005                | 19                                           |
| XL   | BRCA1     | 52  | BRCA1     | 70  | 12       | 1            | 1                   | 0                    | 16                                           |
| XL   | BRCA1     | 52  | BRCA1     | 75  | 18       | 1            | 0                   | 0.002                | 24                                           |
| XL   | BRCA1     | 52  | BRCA1     | 76  | 5        | 1            | 1                   | 0.002                | 26                                           |
| XL   | BRCA1     | 52  | BRCA1     | 90  | 3        | 1            | 1                   | 0.002                | 20                                           |
| XL   | BRCA1     | 52  | BRCA1     | 129 | 4        | 1            | 1                   | 0.002                | -                                            |
| XL   | BRCA1     | 52  | BARD1     | 1   | 2        | 1            | 1                   | 0.008                | 42                                           |
| XL   | BRCA1     | 52  | BARD1     | 21  | 3        | 1            | 0                   | 0.003                | 18                                           |
| XL   | BRCA1     | 58  | BRCA1     | 76  | 6        | 2            | 2                   | 0.01                 | 18                                           |
| XL   | BRCA1     | 58  | BRCA1     | 85  | 8        | 2            | 2                   | 0.005                | 12                                           |
| XL   | BRCA1     | 58  | BRCA1     | 90  | 6        | 1            | 1                   | 0.01                 | 10                                           |
| XL   | BRCA1     | 58  | BARD1     | 71  | 4        | 1            | 1                   | 0.003                | 12                                           |
| XL   | BRCA1     | 65  | BRCA1     | 90  | 4        | 1            | 1                   | 0.005                | 11                                           |
| XL   | BRCA1     | 70  | BRCA1     | 76  | 33       | 1            | 1                   | 0.003                | 11                                           |
| XL   | BRCA1     | 70  | BRCA1     | 85  | 6        | 1            | 1                   | 0.005                | 16                                           |
| XL   | BRCA1     | 70  | BRCA1     | 129 | 4        | 1            | 1                   | 0                    | -                                            |
| XL   | BRCA1     | 70  | BARD1     | 1   | 8        | 1            | 1                   | 0.005                | 56                                           |
| XL   | BRCA1     | 70  | BARD1     | 105 | 5        | 1            | 1                   | 0.01                 | -                                            |
| XL*  | BRCA1     | 75  | BRCA1     | 76  | 5        | 1            | 0                   | 0.009                | 4                                            |
| XL*  | BRCA1     | 75  | BRCA1     | 85  | 7        | 2            | 0                   | 0.005                | 14                                           |
| XL   | BRCA1     | 75  | BARD1     | 21  | 2        | 1            | 0                   | 0.01                 | 39                                           |
| XL   | BRCA1     | 76  | BRCA1     | 85  | 7        | 1            | 1                   | 0.004                | 15                                           |
| XL   | BRCA1     | 76  | BRCA1     | 90  | 27       | 1            | 1                   | 0.003                | 12                                           |
| XL   | BRCA1     | 76  | BARD1     | 1   | 8        | 1            | 1                   | 0.005                | 66                                           |
| XL   | BRCA1     | 76  | BARD1     | 21  | 9        | 1            | 0                   | 0.003                | 41                                           |

|                                                                       |       |     |       |     |    |   |   |       |    |
|-----------------------------------------------------------------------|-------|-----|-------|-----|----|---|---|-------|----|
| XL                                                                    | BRCA1 | 76  | BARD1 | 85  | 3  | 1 | 1 | 0.005 | 44 |
| XL*                                                                   | BRCA1 | 85  | BRCA1 | 90  | 1  | 1 | 1 | 0.006 | 16 |
| XL                                                                    | BRCA1 | 85  | BRCA1 | 129 | 1  | 1 | 1 | 0.005 | -  |
| XL                                                                    | BRCA1 | 90  | BARD1 | 115 | 1  | 1 | 1 | 0.005 | -  |
| XL                                                                    | BARD1 | 1   | BARD1 | 85  | 5  | 1 | 1 | 0.005 | 30 |
| XL                                                                    | BARD1 | 1   | BARD1 | 99  | 19 | 1 | 1 | 0.002 | -  |
| XL                                                                    | BARD1 | 1   | BARD1 | 102 | 18 | 1 | 1 | 0     | -  |
| XL                                                                    | BARD1 | 1   | BARD1 | 105 | 28 | 2 | 2 | 0.004 | -  |
| XL                                                                    | BARD1 | 1   | BARD1 | 115 | 5  | 2 | 2 | 0.005 | -  |
| XL                                                                    | BARD1 | 21  | BARD1 | 85  | 4  | 1 | 0 | 0.005 | 16 |
| XL                                                                    | BARD1 | 21  | BARD1 | 99  | 3  | 1 | 0 | 0.003 | -  |
| XL                                                                    | BARD1 | 21  | BARD1 | 105 | 41 | 2 | 0 | 0.002 | -  |
| XL                                                                    | BARD1 | 21  | BARD1 | 115 | 6  | 1 | 0 | 0.003 | -  |
| XL                                                                    | BARD1 | 85  | BARD1 | 99  | 5  | 1 | 1 | 0.005 | -  |
| XL                                                                    | BARD1 | 85  | BARD1 | 102 | 3  | 1 | 1 | 0.005 | -  |
| XL                                                                    | BARD1 | 85  | BARD1 | 105 | 24 | 2 | 2 | 0.003 | -  |
| XL                                                                    | BARD1 | 85  | BARD1 | 114 | 1  | 1 | 1 | 0.004 | -  |
| XL*                                                                   | BARD1 | 99  | BARD1 | 105 | 47 | 3 | 3 | 0     | -  |
| XL                                                                    | BARD1 | 99  | BARD1 | 115 | 1  | 1 | 1 | 0.003 | -  |
| XL*                                                                   | BARD1 | 102 | BARD1 | 105 | 53 | 4 | 3 | 0     | -  |
| XL                                                                    | BARD1 | 102 | BARD1 | 115 | 3  | 2 | 2 | 0     | -  |
| LL                                                                    | BRCA1 | 40  | BRCA1 | 52  | 3  | 1 | 1 | 0.006 | 14 |
| LL                                                                    | BRCA1 | 65  | BRCA1 | 70  | 5  | 1 | 1 | 0.005 | 9  |
| LL                                                                    | BRCA1 | 70  | BRCA1 | 75  | 5  | 2 | 2 | 0.005 | 9  |
| LL*                                                                   | BRCA1 | 75  | BRCA1 | 76  | 16 | 1 | 1 | 0.003 | 4  |
| LL*                                                                   | BRCA1 | 75  | BRCA1 | 85  | 3  | 1 | 1 | 0.005 | 14 |
| LL*                                                                   | BRCA1 | 85  | BRCA1 | 90  | 9  | 2 | 2 | 0.005 | 16 |
| LL                                                                    | BRCA1 | 129 | BRCA1 | 130 | 13 | 1 | 1 | 0     | -  |
| LL                                                                    | BARD1 | 99  | BARD1 | 102 | 76 | 3 | 3 | 0     | -  |
| LL*                                                                   | BARD1 | 99  | BARD1 | 105 | 9  | 1 | 1 | 0.004 | -  |
| LL*                                                                   | BARD1 | 102 | BARD1 | 105 | 5  | 2 | 2 | 0.005 | -  |
| LL                                                                    | BARD1 | 114 | BARD1 | 115 | 8  | 1 | 1 | 0.005 | -  |
| <b>XL=cross-link; LL=loop-link; *Identified as both a XL and a LL</b> |       |     |       |     |    |   |   |       |    |

**Supplementary Table 4: SCF<sup>FBXL3</sup> unique distance constraints found at 1% FDR.** Source data for Supplementary Figure 1c.

| Type | Protein 1 | Pos | Protein 2 | Pos | Num PSMs | Num Peptides | Num Unique Peptides | Best Peptide Q-Value | Cα-Cα distance if available |
|------|-----------|-----|-----------|-----|----------|--------------|---------------------|----------------------|-----------------------------|
| XL   | Skp1      | 51  | Fbxl3     | 22  | 12       | 1            | 1                   | 0.005                | -                           |
| XL   | Skp1      | 80  | Skp1      | 116 | 3        | 1            | 0                   | 0.008                | 20                          |
| XL   | Skp1      | 114 | Skp1      | 149 | 30       | 2            | 0                   | 0.005                | -                           |
| XL   | Skp1      | 114 | Fbxl3     | 22  | 7        | 1            | 0                   | 0.005                | -                           |
| XL*  | Skp1      | 116 | Skp1      | 123 | 23       | 2            | 0                   | 0.005                | 10                          |
| XL   | Skp1      | 116 | Skp1      | 128 | 118      | 4            | 0                   | 0.001                | 16                          |
| XL   | Skp1      | 116 | Fbxl3     | 22  | 23       | 2            | 0                   | 0.005                | -                           |
| XL   | Skp1      | 123 | Skp1      | 149 | 33       | 2            | 0                   | 0.005                | -                           |
| XL   | Skp1      | 123 | Fbxl3     | 22  | 41       | 3            | 0                   | 0.001                | -                           |
| XL   | Skp1      | 128 | Skp1      | 141 | 6        | 1            | 1                   | 0.001                | 21                          |
| XL   | Skp1      | 128 | Skp1      | 149 | 5        | 1            | 1                   | 0.003                | -                           |
| XL   | Skp1      | 128 | Fbxl3     | 22  | 34       | 5            | 5                   | 0.001                | -                           |
| XL   | Skp1      | 141 | Fbxl3     | 94  | 24       | 1            | 1                   | 0.001                | 18                          |
| XL   | Skp1      | 141 | Fbxl3     | 102 | 61       | 1            | 1                   | 0.005                | 14                          |
| XL   | Skp1      | 141 | Fbxl3     | 106 | 21       | 1            | 1                   | 0.005                | 17                          |
| XL   | Skp1      | 149 | Fbxl3     | 94  | 52       | 2            | 2                   | 0.001                | -                           |
| XL   | Skp1      | 149 | Fbxl3     | 102 | 44       | 2            | 2                   | 0.005                | -                           |
| XL   | Skp1      | 149 | Fbxl3     | 106 | 6        | 1            | 1                   | 0.008                | -                           |
| XL   | Fbxl3     | 118 | Fbxl3     | 180 | 814      | 2            | 2                   | 0.001                | 11                          |
| XL   | Fbxl3     | 142 | Fbxl3     | 180 | 10       | 1            | 1                   | 0.001                | 12                          |
| XL   | Fbxl3     | 142 | Fbxl3     | 203 | 5        | 1            | 1                   | 0.001                | 10                          |
| XL   | Fbxl3     | 174 | Fbxl3     | 192 | 4        | 1            | 1                   | 0.001                | 14                          |
| XL*  | Fbxl3     | 180 | Fbxl3     | 192 | 5        | 1            | 1                   | 0.008                | 16                          |
| XL   | Fbxl3     | 180 | Fbxl3     | 203 | 50       | 1            | 1                   | 0.001                | 11                          |
| XL   | Fbxl3     | 180 | Fbxl3     | 206 | 203      | 1            | 1                   | 0.001                | 5                           |
| XL   | Fbxl3     | 180 | mCRY2     | 163 | 18       | 1            | 1                   | 0.005                | 40                          |
| XL   | Fbxl3     | 180 | mCRY2     | 503 | 14       | 1            | 1                   | 0.003                | 15                          |
| XL   | Fbxl3     | 192 | mCRY2     | 163 | 46       | 1            | 1                   | 0.001                | 57                          |
| XL   | Fbxl3     | 192 | mCRY2     | 503 | 10       | 1            | 1                   | 0.001                | 30                          |
| XL   | Fbxl3     | 203 | Fbxl3     | 250 | 4        | 1            | 1                   | 0.002                | 15                          |



|     |       |     |       |     |      |   |   |       |    |
|-----|-------|-----|-------|-----|------|---|---|-------|----|
| XL  | Fbxl3 | 203 | mCRY2 | 503 | 9    | 1 | 1 | 0.005 | 21 |
| XL  | mCRY2 | 2   | mCRY2 | 86  | 21   | 1 | 1 | 0.001 | -  |
| XL  | mCRY2 | 2   | mCRY2 | 107 | 25   | 1 | 1 | 0     | -  |
| XL  | mCRY2 | 2   | mCRY2 | 133 | 8    | 1 | 1 | 0.002 | -  |
| XL  | mCRY2 | 2   | mCRY2 | 182 | 1    | 1 | 1 | 0.005 | -  |
| XL  | mCRY2 | 2   | mCRY2 | 183 | 32   | 2 | 2 | 0     | -  |
| XL  | mCRY2 | 107 | mCRY2 | 133 | 27   | 1 | 1 | 0.003 | 16 |
| XL  | mCRY2 | 107 | mCRY2 | 136 | 12   | 1 | 1 | 0.001 | 14 |
| XL  | mCRY2 | 107 | mCRY2 | 183 | 5    | 1 | 1 | 0.005 | 37 |
| XL  | mCRY2 | 125 | mCRY2 | 136 | 27   | 1 | 1 | 0.001 | 16 |
| XL  | mCRY2 | 183 | mCRY2 | 292 | 315  | 3 | 3 | 0.001 | 16 |
| XL* | mCRY2 | 241 | mCRY2 | 246 | 468  | 2 | 2 | 0.001 | 10 |
| XL  | mCRY2 | 453 | mCRY2 | 474 | 21   | 1 | 1 | 0.002 | 12 |
| XL  | mCRY2 | 453 | mCRY2 | 477 | 24   | 2 | 2 | 0.008 | 8  |
| XL  | mCRY2 | 455 | mCRY2 | 477 | 2476 | 3 | 3 | 0.001 | 9  |
| LL  | Skp1  | 22  | Skp1  | 28  | 4    | 2 | 2 | 0     | 10 |
| LL  | Skp1  | 50  | Skp1  | 51  | 13   | 1 | 1 | 0     | 4  |
| LL  | Skp1  | 107 | Skp1  | 114 | 2    | 1 | 1 | 0.005 | 11 |
| LL  | Skp1  | 114 | Skp1  | 116 | 55   | 2 | 0 | 0.001 | 6  |
| LL* | Skp1  | 116 | Skp1  | 123 | 1    | 1 | 1 | 0.006 | 10 |
| LL  | Skp1  | 123 | Skp1  | 128 | 35   | 2 | 2 | 0.001 | 9  |
| LL  | Fbxl3 | 22  | Fbxl3 | 24  | 47   | 2 | 2 | 0.001 | -  |
| LL  | Fbxl3 | 22  | Fbxl3 | 25  | 19   | 2 | 2 | 0.001 | -  |
| LL  | Fbxl3 | 24  | Fbxl3 | 25  | 9    | 1 | 1 | 0.001 | -  |
| LL  | Fbxl3 | 94  | Fbxl3 | 102 | 8    | 1 | 1 | 0.001 | 17 |
| LL  | Fbxl3 | 102 | Fbxl3 | 106 | 56   | 1 | 1 | 0.005 | 6  |
| LL  | Fbxl3 | 174 | Fbxl3 | 180 | 2    | 1 | 1 | 0.002 | 17 |
| LL* | Fbxl3 | 180 | Fbxl3 | 192 | 2    | 1 | 1 | 0.005 | 16 |
| LL  | Fbxl3 | 192 | Fbxl3 | 203 | 7    | 1 | 1 | 0.001 | 16 |
| LL  | Fbxl3 | 203 | Fbxl3 | 206 | 21   | 1 | 1 | 0     | 10 |
| LL  | Fbxl3 | 404 | Fbxl3 | 416 | 42   | 1 | 1 | 0.001 | 17 |
| LL  | mCRY2 | 133 | mCRY2 | 136 | 138  | 2 | 2 | 0     | 5  |
| LL  | mCRY2 | 163 | mCRY2 | 169 | 39   | 1 | 1 | 0.003 | 15 |
| LL  | mCRY2 | 182 | mCRY2 | 183 | 77   | 2 | 2 | 0.001 | 4  |
| LL* | mCRY2 | 241 | mCRY2 | 246 | 21   | 1 | 1 | 0.001 | 10 |
| LL  | mCRY2 | 292 | mCRY2 | 293 | 7    | 1 | 1 | 0.007 | 4  |

|                                                                       |       |     |       |     |    |   |   |       |   |
|-----------------------------------------------------------------------|-------|-----|-------|-----|----|---|---|-------|---|
| LL                                                                    | mCRY2 | 292 | mCRY2 | 295 | 6  | 1 | 1 | 0.005 | 6 |
| LL                                                                    | mCRY2 | 293 | mCRY2 | 295 | 2  | 1 | 1 | 0.003 | 6 |
| LL                                                                    | mCRY2 | 453 | mCRY2 | 455 | 67 | 2 | 2 | 0.005 | 6 |
| LL                                                                    | mCRY2 | 474 | mCRY2 | 477 | 78 | 2 | 2 | 0     | 5 |
| <b>XL=cross-link; LL=loop-link; *Identified as both a XL and a LL</b> |       |     |       |     |    |   |   |       |   |

**Supplementary Table 5: Comparison of the number of unique cross-link identifications from various published cross-linking methods applied to a range of protein complexes.** Results obtained using Kojak are shaded lilac.

| Complex Name             | ~ Size (kDa) | Num. of Subunits in complex | Number of unique cross-links | Number of unique cross-links per kDa protein | FDR | Isotope Labeling | Post cross-linking enrichment or fractionation | Reference    |
|--------------------------|--------------|-----------------------------|------------------------------|----------------------------------------------|-----|------------------|------------------------------------------------|--------------|
| TRiC Bovine              | 1000         | 16                          | 73 to 189*                   | 0.07 to 0.19                                 | 5%  | yes <sup>1</sup> | SEC                                            | <sup>2</sup> |
| TRiC Yeast               | 1000         | 16                          | 206 to 226†                  | 0.21 to 0.23                                 | 5%  | yes <sup>1</sup> | SEC                                            | <sup>2</sup> |
| GST homodimer            | 50           | 2                           | 8                            | 0.16                                         | 5%  | yes <sup>2</sup> | n/a                                            | <sup>3</sup> |
| CNGP                     | 80           | 4                           | 15                           | 0.18                                         | 5%  | no <sup>3</sup>  | n/a                                            | <sup>3</sup> |
| yeast UTP-B              | 550          | 6                           | 71                           | 0.13                                         | 5%  | yes <sup>2</sup> | n/a                                            | <sup>3</sup> |
| RNA polymerase II        | 510          | 12                          | 106                          | 0.21                                         | n/a | no <sup>3</sup>  | SCX                                            | <sup>4</sup> |
| As above + TFIIF complex | 670          | 15                          | 402                          | 0.60                                         | n/a | no <sup>3</sup>  | SCX                                            | <sup>4</sup> |
| RNA polymerase I         | 590          | 14                          | 239                          | 0.41                                         | n/a | yes <sup>1</sup> | SEC                                            | <sup>5</sup> |
| SCF <sup>FBXL3</sup>     | 130          | 3                           | 91                           | 0.70                                         | 1%  | no <sup>4</sup>  | no                                             | <sup>6</sup> |
| Ndc80 complex            | 185          | 4                           | 277                          | 1.50                                         | 5%  | no <sup>4</sup>  | no                                             | <sup>7</sup> |
| BARD1/BRCA1              | 27           | 2                           | 75                           | 2.78                                         | 5%  | no <sup>4</sup>  | no                                             | this study   |
| SCF <sup>FBXL3</sup>     | 130          | 3                           | 89                           | 0.68                                         | 5%  | no <sup>4</sup>  | no                                             | this study   |
| γ-TuSC                   | 300          | 3                           | 111                          | 0.37                                         | 5%  | no <sup>4</sup>  | no                                             | this study   |
| Dam1 complex             | 200          | 10                          | 618                          | 3.09                                         | 5%  | no <sup>4</sup>  | no                                             | this study   |

SEC = size exclusion chromatography; SCX = strong cation exchange chromatography; \*TRiC was cross-linked in the apo, ATP, and ATP+AlFx states; †TRiC was cross-linked in the apo and ATP+AlFx states.

<sup>1</sup>DSS-d0/d12; <sup>2</sup>BS3-d0/d4; <sup>3</sup>BS3; <sup>4</sup>DSS

**Supplementary Table 6: Unique distance constraints within the Dam1p complex found at 1% FDR and cross-linked in the presence (+) or absence (-) of microtubules (MTs).**

| Type | Protein 1 | Pos | Protein 2 | Pos | Num PSMs | Num Peptides | Num Unique Peptides | Best Peptide Q-Value | Identified Cross-linked +/- MTs |
|------|-----------|-----|-----------|-----|----------|--------------|---------------------|----------------------|---------------------------------|
| XL*  | Ask1p     | 1   | Ask1p     | 12  | 33       | 1            | 1                   | 0                    | +/-                             |
| XL   | Ask1p     | 1   | Ask1p     | 260 | 1        | 1            | 1                   | 0.002                | -                               |
| XL   | Ask1p     | 1   | Dad2p     | 1   | 16       | 3            | 3                   | 0                    | -                               |
| XL   | Ask1p     | 1   | Spc34p    | 274 | 3        | 1            | 1                   | 0.007                | +                               |
| XL   | Ask1p     | 6   | Dad2p     | 1   | 3        | 1            | 1                   | 0.003                | -                               |
| XL   | Ask1p     | 151 | Ask1p     | 198 | 9        | 1            | 1                   | 0                    | +/-                             |
| XL   | Ask1p     | 151 | Ask1p     | 222 | 2        | 1            | 1                   | 0                    | -                               |
| XL   | Ask1p     | 151 | Ask1p     | 225 | 15       | 1            | 1                   | 0                    | +/-                             |
| XL   | Ask1p     | 151 | Dad2p     | 1   | 3        | 1            | 1                   | 0.001                | +                               |
| XL   | Ask1p     | 151 | Spc34p    | 2   | 6        | 1            | 1                   | 0                    | +                               |
| XL   | Ask1p     | 151 | Spc34p    | 274 | 2        | 1            | 1                   | 0.002                | +                               |
| XL   | Ask1p     | 198 | Ask1p     | 225 | 58       | 1            | 1                   | 0                    | +/-                             |
| XL   | Ask1p     | 198 | Ask1p     | 253 | 1        | 1            | 1                   | 0.001                | -                               |
| XL   | Ask1p     | 198 | Ask1p     | 260 | 2        | 1            | 1                   | 0.002                | +/-                             |
| XL   | Ask1p     | 198 | Spc34p    | 2   | 2        | 1            | 1                   | 0                    | +                               |
| XL   | Ask1p     | 198 | Spc34p    | 249 | 9        | 1            | 1                   | 0                    | +                               |
| XL*  | Ask1p     | 222 | Ask1p     | 225 | 47       | 3            | 3                   | 0                    | +/-                             |
| XL   | Ask1p     | 222 | Ask1p     | 260 | 6        | 1            | 1                   | 0                    | +/-                             |
| XL   | Ask1p     | 225 | Ask1p     | 225 | 1        | 1            | 1                   | 0                    | +                               |
| XL   | Ask1p     | 225 | Ask1p     | 260 | 63       | 1            | 1                   | 0                    | +/-                             |
| XL   | Ask1p     | 225 | Ask1p     | 277 | 9        | 1            | 1                   | 0                    | +/-                             |
| XL   | Ask1p     | 225 | Ask1p     | 281 | 24       | 1            | 1                   | 0                    | +/-                             |
| XL   | Ask1p     | 225 | Spc34p    | 249 | 2        | 1            | 1                   | 0.001                | +                               |
| XL   | Ask1p     | 253 | Ask1p     | 281 | 16       | 2            | 2                   | 0.001                | -                               |
| XL*  | Ask1p     | 260 | Ask1p     | 281 | 23       | 1            | 1                   | 0                    | +/-                             |
| XL   | Dad1p     | 1   | Ask1p     | 198 | 8        | 1            | 1                   | 0                    | +                               |
| XL   | Dad1p     | 1   | Ask1p     | 222 | 1        | 1            | 1                   | 0.002                | -                               |
| XL   | Dad1p     | 1   | Ask1p     | 225 | 11       | 1            | 1                   | 0                    | +                               |
| XL   | Dad1p     | 1   | Ask1p     | 253 | 2        | 2            | 2                   | 0                    | +/-                             |
| XL   | Dad1p     | 1   | Ask1p     | 260 | 4        | 1            | 1                   | 0                    | +/-                             |

|     |       |   |       |     |     |   |   |       |     |
|-----|-------|---|-------|-----|-----|---|---|-------|-----|
| XL  | Dad1p | 1 | Ask1p | 277 | 6   | 1 | 1 | 0.005 | +   |
| XL  | Dad1p | 1 | Ask1p | 281 | 3   | 1 | 1 | 0.001 | +   |
| XL  | Dad1p | 1 | Dad1p | 1   | 13  | 1 | 1 | 0     | -   |
| XL* | Dad1p | 1 | Dad1p | 11  | 11  | 2 | 2 | 0     | -   |
| XL  | Dad1p | 1 | Dad1p | 18  | 123 | 1 | 1 | 0     | +/- |
| XL  | Dad1p | 1 | Dad1p | 67  | 1   | 1 | 1 | 0     | -   |
| XL  | Dad1p | 1 | Dad1p | 92  | 24  | 2 | 2 | 0     | +/- |
| XL  | Dad1p | 1 | Dad1p | 94  | 16  | 2 | 2 | 0     | +/- |
| XL  | Dad1p | 1 | Dad2p | 1   | 3   | 1 | 1 | 0     | -   |
| XL  | Dad1p | 1 | Dad2p | 11  | 21  | 1 | 1 | 0     | +/- |
| XL  | Dad1p | 1 | Dad2p | 13  | 10  | 1 | 1 | 0.001 | +/- |
| XL  | Dad1p | 1 | Dad2p | 20  | 4   | 1 | 1 | 0     | -   |
| XL  | Dad1p | 1 | Dad4p | 1   | 48  | 2 | 2 | 0     | +/- |
| XL  | Dad1p | 1 | Dad4p | 21  | 10  | 1 | 1 | 0.001 | +/- |
| XL  | Dad1p | 1 | Dam1p | 7   | 24  | 2 | 2 | 0.001 | +/- |
| XL  | Dad1p | 1 | Dam1p | 40  | 65  | 3 | 3 | 0     | +/- |
| XL  | Dad1p | 1 | Dam1p | 66  | 22  | 1 | 1 | 0     | +/- |
| XL  | Dad1p | 1 | Dam1p | 256 | 5   | 1 | 1 | 0     | -   |
| XL  | Dad1p | 1 | Dam1p | 307 | 12  | 1 | 1 | 0     | +/- |
| XL  | Dad1p | 1 | Duo1p | 14  | 7   | 1 | 1 | 0.005 | -   |
| XL  | Dad1p | 1 | Duo1p | 33  | 46  | 1 | 1 | 0     | +/- |
| XL  | Dad1p | 1 | Duo1p | 36  | 74  | 1 | 1 | 0     | +/- |
| XL  | Dad1p | 1 | Duo1p | 66  | 65  | 3 | 3 | 0     | +/- |
| XL  | Dad1p | 1 | Duo1p | 73  | 9   | 1 | 1 | 0     | -   |
| XL  | Dad1p | 1 | Duo1p | 86  | 3   | 1 | 1 | 0.001 | -   |
| XL  | Dad1p | 1 | Duo1p | 101 | 1   | 1 | 1 | 0.005 | -   |
| XL  | Dad1p | 1 | Duo1p | 122 | 4   | 1 | 1 | 0.001 | -   |
| XL  | Dad1p | 1 | Duo1p | 131 | 4   | 1 | 1 | 0     | -   |
| XL  | Dad1p | 1 | Duo1p | 159 | 4   | 1 | 1 | 0     | -   |
| XL  | Dad1p | 1 | Duo1p | 160 | 4   | 1 | 1 | 0.005 | -   |
| XL  | Dad1p | 1 | Duo1p | 169 | 11  | 1 | 1 | 0.001 | +/- |
| XL  | Dad1p | 1 | Duo1p | 177 | 8   | 1 | 1 | 0.004 | +/- |
| XL  | Dad1p | 1 | Duo1p | 215 | 9   | 1 | 1 | 0.002 | -   |
| XL  | Dad1p | 1 | Duo1p | 236 | 14  | 1 | 1 | 0     | +/- |
| XL  | Dad1p | 1 | Hsk3p | 5   | 12  | 1 | 1 | 0     | -   |
| XL  | Dad1p | 1 | Hsk3p | 28  | 1   | 1 | 1 | 0.001 | -   |

|    |       |    |        |     |    |   |   |       |     |
|----|-------|----|--------|-----|----|---|---|-------|-----|
| XL | Dad1p | 1  | Spc19p | 1   | 2  | 1 | 1 | 0     | -   |
| XL | Dad1p | 1  | Spc19p | 59  | 15 | 1 | 1 | 0     | -   |
| XL | Dad1p | 1  | Spc19p | 76  | 17 | 1 | 1 | 0.001 | +/- |
| XL | Dad1p | 1  | Spc19p | 104 | 11 | 1 | 1 | 0     | +/- |
| XL | Dad1p | 1  | Spc19p | 146 | 2  | 1 | 1 | 0.004 | -   |
| XL | Dad1p | 1  | Spc19p | 158 | 10 | 1 | 1 | 0     | +   |
| XL | Dad1p | 1  | Spc34p | 1   | 2  | 1 | 1 | 0.001 | -   |
| XL | Dad1p | 1  | Spc34p | 2   | 19 | 1 | 1 | 0     | +/- |
| XL | Dad1p | 1  | Spc34p | 46  | 2  | 1 | 1 | 0.006 | +/- |
| XL | Dad1p | 1  | Spc34p | 70  | 9  | 1 | 1 | 0     | +/- |
| XL | Dad1p | 1  | Spc34p | 79  | 1  | 1 | 1 | 0.003 | -   |
| XL | Dad1p | 1  | Spc34p | 88  | 4  | 1 | 1 | 0     | +   |
| XL | Dad1p | 1  | Spc34p | 112 | 43 | 4 | 4 | 0     | +/- |
| XL | Dad1p | 1  | Spc34p | 118 | 23 | 1 | 1 | 0     | +/- |
| XL | Dad1p | 1  | Spc34p | 126 | 7  | 1 | 1 | 0.002 | +/- |
| XL | Dad1p | 1  | Spc34p | 198 | 7  | 1 | 1 | 0.001 | +/- |
| XL | Dad1p | 1  | Spc34p | 243 | 15 | 1 | 1 | 0     | +/- |
| XL | Dad1p | 1  | Spc34p | 249 | 13 | 1 | 1 | 0     | +/- |
| XL | Dad1p | 1  | Spc34p | 274 | 8  | 1 | 1 | 0     | +   |
| XL | Dad1p | 2  | Dad4p  | 2   | 8  | 1 | 1 | 0     | -   |
| XL | Dad1p | 2  | Dam1p  | 1   | 6  | 1 | 0 | 0.001 | +/- |
| XL | Dad1p | 11 | Dad2p  | 11  | 38 | 2 | 2 | 0     | +/- |
| XL | Dad1p | 11 | Dad4p  | 1   | 29 | 2 | 2 | 0     | +/- |
| XL | Dad1p | 11 | Dam1p  | 40  | 1  | 1 | 1 | 0     | +   |
| XL | Dad1p | 11 | Duo1p  | 33  | 11 | 2 | 2 | 0.001 | +/- |
| XL | Dad1p | 11 | Duo1p  | 36  | 5  | 2 | 2 | 0.003 | +/- |
| XL | Dad1p | 11 | Hsk3p  | 5   | 4  | 1 | 1 | 0.003 | -   |
| XL | Dad1p | 11 | Spc34p | 112 | 1  | 1 | 1 | 0.004 | +   |
| XL | Dad1p | 18 | Dad1p  | 18  | 1  | 1 | 1 | 0.003 | -   |
| XL | Dad1p | 18 | Dad1p  | 92  | 14 | 1 | 1 | 0.001 | +/- |
| XL | Dad1p | 18 | Dad1p  | 94  | 8  | 1 | 1 | 0     | +/- |
| XL | Dad1p | 18 | Dad2p  | 11  | 12 | 1 | 1 | 0.001 | -   |
| XL | Dad1p | 18 | Dad4p  | 1   | 8  | 1 | 1 | 0     | +/- |
| XL | Dad1p | 18 | Dam1p  | 7   | 2  | 1 | 1 | 0.004 | -   |
| XL | Dad1p | 18 | Dam1p  | 40  | 14 | 1 | 1 | 0.001 | +/- |
| XL | Dad1p | 18 | Duo1p  | 33  | 28 | 2 | 2 | 0     | +/- |

|     |       |     |        |     |     |   |   |       |     |
|-----|-------|-----|--------|-----|-----|---|---|-------|-----|
| XL  | Dad1p | 18  | Duo1p  | 36  | 77  | 1 | 1 | 0     | +/- |
| XL  | Dad1p | 18  | Duo1p  | 169 | 3   | 1 | 1 | 0.007 | -   |
| XL  | Dad1p | 18  | Duo1p  | 236 | 4   | 1 | 1 | 0.005 | -   |
| XL  | Dad1p | 18  | Spc19p | 44  | 2   | 1 | 1 | 0.002 | -   |
| XL  | Dad1p | 18  | Spc19p | 59  | 3   | 1 | 1 | 0.002 | -   |
| XL  | Dad1p | 18  | Spc34p | 88  | 20  | 1 | 1 | 0     | +/- |
| XL  | Dad1p | 18  | Spc34p | 112 | 10  | 1 | 1 | 0     | +   |
| XL  | Dad1p | 18  | Spc34p | 249 | 3   | 1 | 1 | 0.002 | +/- |
| XL  | Dad1p | 92  | Ask1p  | 151 | 2   | 1 | 1 | 0     | +   |
| XL  | Dad1p | 92  | Ask1p  | 225 | 2   | 1 | 1 | 0.005 | +   |
| XL  | Dad1p | 92  | Dad4p  | 1   | 4   | 1 | 1 | 0.004 | +/- |
| XL  | Dad1p | 92  | Duo1p  | 36  | 10  | 1 | 1 | 0     | +   |
| XL  | Dad1p | 92  | Spc34p | 112 | 4   | 1 | 1 | 0     | +/- |
| XL  | Dad1p | 92  | Spc34p | 249 | 3   | 1 | 1 | 0.002 | +   |
| XL  | Dad1p | 94  | Ask1p  | 225 | 1   | 1 | 1 | 0.005 | +   |
| XL  | Dad1p | 94  | Dad1p  | 94  | 1   | 1 | 1 | 0.001 | -   |
| XL  | Dad1p | 94  | Dad4p  | 1   | 13  | 1 | 1 | 0     | +/- |
| XL  | Dad1p | 94  | Duo1p  | 36  | 1   | 1 | 1 | 0.001 | +   |
| XL  | Dad1p | 94  | Spc34p | 112 | 3   | 1 | 1 | 0.003 | -   |
| XL  | Dad2p | 1   | Dad2p  | 13  | 22  | 2 | 2 | 0     | +/- |
| XL  | Dad2p | 11  | Dad2p  | 20  | 7   | 1 | 1 | 0.001 | -   |
| XL  | Dad2p | 13  | Dad2p  | 29  | 6   | 1 | 1 | 0.001 | -   |
| XL  | Dad2p | 88  | Spc34p | 41  | 1   | 1 | 1 | 0.001 | -   |
| XL  | Dad2p | 106 | Spc34p | 41  | 3   | 1 | 1 | 0     | -   |
| XL  | Dad2p | 106 | Spc34p | 46  | 1   | 1 | 1 | 0.005 | -   |
| XL  | Dad2p | 106 | Spc34p | 249 | 4   | 1 | 1 | 0.002 | +   |
| XL  | Dad3p | 1   | Ask1p  | 225 | 2   | 1 | 1 | 0.001 | +   |
| XL  | Dad3p | 1   | Dad1p  | 1   | 135 | 4 | 4 | 0     | +/- |
| XL  | Dad3p | 1   | Dad1p  | 11  | 87  | 4 | 4 | 0     | +/- |
| XL  | Dad3p | 1   | Dad1p  | 18  | 128 | 3 | 3 | 0     | +/- |
| XL  | Dad3p | 1   | Dad1p  | 92  | 19  | 2 | 2 | 0     | +/- |
| XL  | Dad3p | 1   | Dad1p  | 94  | 29  | 2 | 2 | 0     | +/- |
| XL  | Dad3p | 1   | Dad2p  | 1   | 8   | 2 | 2 | 0     | -   |
| XL  | Dad3p | 1   | Dad2p  | 11  | 10  | 2 | 2 | 0.001 | -   |
| XL  | Dad3p | 1   | Dad3p  | 1   | 28  | 3 | 3 | 0     | +/- |
| XL* | Dad3p | 1   | Dad3p  | 15  | 8   | 1 | 1 | 0     | +/- |

|     |       |   |        |     |     |   |   |       |     |
|-----|-------|---|--------|-----|-----|---|---|-------|-----|
| XL* | Dad3p | 1 | Dad3p  | 17  | 33  | 1 | 1 | 0     | +/- |
| XL  | Dad3p | 1 | Dad3p  | 72  | 8   | 1 | 1 | 0.001 | -   |
| XL  | Dad3p | 1 | Dad3p  | 83  | 33  | 2 | 2 | 0     | +/- |
| XL  | Dad3p | 1 | Dad3p  | 94  | 32  | 3 | 3 | 0     | +/- |
| XL  | Dad3p | 1 | Dad4p  | 1   | 49  | 2 | 2 | 0     | +/- |
| XL  | Dad3p | 1 | Dad4p  | 21  | 6   | 1 | 1 | 0.001 | +/- |
| XL  | Dad3p | 1 | Dam1p  | 7   | 9   | 2 | 2 | 0     | -   |
| XL  | Dad3p | 1 | Dam1p  | 40  | 30  | 3 | 3 | 0     | +/- |
| XL  | Dad3p | 1 | Duo1p  | 33  | 54  | 3 | 3 | 0     | +/- |
| XL  | Dad3p | 1 | Duo1p  | 36  | 83  | 2 | 2 | 0     | +/- |
| XL  | Dad3p | 1 | Duo1p  | 66  | 7   | 3 | 3 | 0     | -   |
| XL  | Dad3p | 1 | Duo1p  | 73  | 6   | 2 | 2 | 0     | -   |
| XL  | Dad3p | 1 | Duo1p  | 131 | 5   | 1 | 1 | 0.001 | -   |
| XL  | Dad3p | 1 | Duo1p  | 161 | 1   | 1 | 1 | 0     | -   |
| XL  | Dad3p | 1 | Duo1p  | 169 | 1   | 1 | 1 | 0.006 | -   |
| XL  | Dad3p | 1 | Duo1p  | 177 | 4   | 1 | 1 | 0.004 | -   |
| XL  | Dad3p | 1 | Duo1p  | 183 | 2   | 1 | 1 | 0.003 | -   |
| XL  | Dad3p | 1 | Duo1p  | 215 | 6   | 1 | 1 | 0     | -   |
| XL  | Dad3p | 1 | Duo1p  | 222 | 2   | 1 | 1 | 0.001 | -   |
| XL  | Dad3p | 1 | Hsk3p  | 5   | 18  | 2 | 2 | 0     | +/- |
| XL  | Dad3p | 1 | Spc19p | 59  | 3   | 1 | 1 | 0     | +/- |
| XL  | Dad3p | 1 | Spc19p | 104 | 3   | 2 | 2 | 0.002 | +/- |
| XL  | Dad3p | 1 | Spc19p | 158 | 6   | 1 | 1 | 0.001 | +/- |
| XL  | Dad3p | 1 | Spc34p | 70  | 2   | 1 | 1 | 0.001 | +   |
| XL  | Dad3p | 1 | Spc34p | 79  | 36  | 4 | 4 | 0     | +/- |
| XL  | Dad3p | 1 | Spc34p | 88  | 67  | 3 | 3 | 0     | +/- |
| XL  | Dad3p | 1 | Spc34p | 112 | 123 | 5 | 5 | 0     | +/- |
| XL  | Dad3p | 1 | Spc34p | 118 | 67  | 2 | 2 | 0     | +/- |
| XL  | Dad3p | 1 | Spc34p | 126 | 24  | 3 | 3 | 0     | +/- |
| XL  | Dad3p | 1 | Spc34p | 162 | 3   | 1 | 1 | 0.004 | -   |
| XL  | Dad3p | 1 | Spc34p | 169 | 14  | 2 | 2 | 0     | +/- |
| XL  | Dad3p | 1 | Spc34p | 243 | 1   | 1 | 1 | 0.004 | +   |
| XL  | Dad3p | 1 | Spc34p | 249 | 1   | 1 | 1 | 0     | +   |
| XL  | Dad3p | 2 | Dad1p  | 2   | 34  | 4 | 4 | 0     | +/- |
| XL  | Dad3p | 2 | Dad1p  | 11  | 2   | 1 | 1 | 0.004 | -   |
| XL  | Dad3p | 2 | Dam1p  | 1   | 5   | 2 | 0 | 0     | -   |



|     |       |    |        |     |    |   |   |       |     |
|-----|-------|----|--------|-----|----|---|---|-------|-----|
| XL  | Dad3p | 15 | Dad1p  | 1   | 28 | 2 | 2 | 0     | +/- |
| XL  | Dad3p | 15 | Dad1p  | 11  | 4  | 2 | 2 | 0.001 | -   |
| XL  | Dad3p | 15 | Dad1p  | 92  | 2  | 1 | 1 | 0.009 | -   |
| XL  | Dad3p | 15 | Dad1p  | 94  | 5  | 1 | 1 | 0.003 | -   |
| XL  | Dad3p | 15 | Dad2p  | 1   | 5  | 1 | 1 | 0     | -   |
| XL  | Dad3p | 15 | Dad3p  | 15  | 1  | 1 | 1 | 0.004 | -   |
| XL* | Dad3p | 15 | Dad3p  | 17  | 11 | 2 | 2 | 0     | -   |
| XL  | Dad3p | 15 | Dad3p  | 72  | 3  | 1 | 1 | 0     | -   |
| XL  | Dad3p | 15 | Dad3p  | 83  | 22 | 1 | 1 | 0     | -   |
| XL  | Dad3p | 15 | Dad3p  | 94  | 18 | 2 | 2 | 0     | -   |
| XL  | Dad3p | 15 | Dad4p  | 1   | 23 | 1 | 1 | 0     | +/- |
| XL  | Dad3p | 15 | Dad4p  | 21  | 18 | 1 | 1 | 0     | +/- |
| XL  | Dad3p | 15 | Spc34p | 2   | 10 | 1 | 1 | 0     | +   |
| XL  | Dad3p | 15 | Spc34p | 65  | 3  | 1 | 1 | 0.001 | -   |
| XL  | Dad3p | 15 | Spc34p | 70  | 7  | 1 | 1 | 0.002 | +   |
| XL  | Dad3p | 15 | Spc34p | 88  | 4  | 1 | 1 | 0.005 | +/- |
| XL  | Dad3p | 15 | Spc34p | 169 | 4  | 1 | 1 | 0.002 | +   |
| XL  | Dad3p | 17 | Dad1p  | 1   | 24 | 2 | 2 | 0     | +/- |
| XL  | Dad3p | 17 | Dad1p  | 18  | 4  | 1 | 1 | 0.005 | -   |
| XL  | Dad3p | 17 | Dad1p  | 92  | 1  | 1 | 1 | 0.006 | -   |
| XL  | Dad3p | 17 | Dad1p  | 94  | 1  | 1 | 1 | 0.003 | -   |
| XL  | Dad3p | 17 | Dad3p  | 83  | 10 | 1 | 1 | 0.001 | -   |
| XL  | Dad3p | 17 | Dad4p  | 1   | 1  | 1 | 1 | 0.007 | -   |
| XL  | Dad3p | 17 | Spc34p | 65  | 6  | 2 | 2 | 0.001 | +/- |
| XL  | Dad3p | 17 | Spc34p | 70  | 20 | 2 | 2 | 0.005 | +/- |
| XL  | Dad3p | 17 | Spc34p | 88  | 9  | 1 | 1 | 0.003 | +/- |
| XL  | Dad3p | 17 | Spc34p | 169 | 14 | 1 | 1 | 0     | +/- |
| XL  | Dad3p | 24 | Dad1p  | 1   | 4  | 1 | 1 | 0     | -   |
| XL  | Dad3p | 24 | Dad4p  | 1   | 1  | 1 | 1 | 0.003 | -   |
| XL  | Dad3p | 24 | Spc34p | 70  | 31 | 2 | 2 | 0     | +/- |
| XL  | Dad3p | 31 | Dad1p  | 1   | 6  | 1 | 1 | 0     | -   |
| XL  | Dad3p | 31 | Dad3p  | 83  | 11 | 1 | 1 | 0     | -   |
| XL  | Dad3p | 31 | Dad3p  | 94  | 11 | 1 | 1 | 0     | -   |
| XL  | Dad3p | 31 | Duo1p  | 33  | 7  | 1 | 1 | 0.001 | -   |
| XL  | Dad3p | 31 | Duo1p  | 86  | 6  | 1 | 1 | 0     | -   |
| XL  | Dad3p | 31 | Spc34p | 70  | 21 | 1 | 1 | 0     | +/- |

|     |       |    |       |     |    |   |   |       |     |
|-----|-------|----|-------|-----|----|---|---|-------|-----|
| XL  | Dad3p | 63 | Dad1p | 1   | 4  | 1 | 1 | 0.001 | -   |
| XL  | Dad3p | 63 | Dad3p | 83  | 11 | 1 | 1 | 0     | -   |
| XL  | Dad3p | 72 | Dad1p | 1   | 11 | 1 | 1 | 0     | -   |
| XL  | Dad3p | 72 | Dad1p | 94  | 1  | 1 | 1 | 0.003 | -   |
| XL* | Dad3p | 72 | Dad3p | 83  | 67 | 1 | 1 | 0     | +/- |
| XL  | Dad3p | 72 | Dad3p | 94  | 18 | 2 | 2 | 0     | -   |
| XL  | Dad3p | 72 | Dam1p | 7   | 3  | 1 | 1 | 0.006 | -   |
| XL  | Dad3p | 72 | Duo1p | 169 | 6  | 1 | 1 | 0.005 | -   |
| XL  | Dad3p | 72 | Duo1p | 236 | 2  | 1 | 1 | 0.001 | -   |
| XL  | Dad3p | 83 | Ask1p | 6   | 5  | 2 | 2 | 0.002 | +/- |
| XL  | Dad3p | 83 | Ask1p | 86  | 10 | 1 | 1 | 0     | -   |
| XL  | Dad3p | 83 | Ask1p | 151 | 8  | 1 | 1 | 0     | +/- |
| XL  | Dad3p | 83 | Ask1p | 198 | 8  | 1 | 1 | 0     | +/- |
| XL  | Dad3p | 83 | Ask1p | 225 | 5  | 1 | 1 | 0     | -   |
| XL  | Dad3p | 83 | Dad1p | 1   | 32 | 1 | 1 | 0     | +/- |
| XL  | Dad3p | 83 | Dad1p | 11  | 8  | 2 | 2 | 0     | -   |
| XL  | Dad3p | 83 | Dad1p | 18  | 16 | 1 | 1 | 0     | -   |
| XL  | Dad3p | 83 | Dad1p | 67  | 3  | 1 | 1 | 0     | -   |
| XL  | Dad3p | 83 | Dad1p | 92  | 8  | 1 | 1 | 0.002 | +/- |
| XL  | Dad3p | 83 | Dad1p | 94  | 3  | 1 | 1 | 0.003 | +/- |
| XL  | Dad3p | 83 | Dad2p | 1   | 31 | 2 | 2 | 0     | +/- |
| XL  | Dad3p | 83 | Dad2p | 11  | 2  | 1 | 1 | 0.001 | -   |
| XL  | Dad3p | 83 | Dad2p | 13  | 1  | 1 | 1 | 0.006 | -   |
| XL  | Dad3p | 83 | Dad2p | 20  | 1  | 1 | 1 | 0.003 | -   |
| XL  | Dad3p | 83 | Dad3p | 83  | 28 | 1 | 1 | 0     | +/- |
| XL  | Dad3p | 83 | Dad3p | 94  | 9  | 1 | 1 | 0     | -   |
| XL  | Dad3p | 83 | Dad4p | 1   | 94 | 1 | 1 | 0     | +/- |
| XL  | Dad3p | 83 | Dad4p | 21  | 8  | 1 | 1 | 0.007 | -   |
| XL  | Dad3p | 83 | Dad4p | 42  | 24 | 2 | 2 | 0     | +/- |
| XL  | Dad3p | 83 | Dam1p | 7   | 4  | 1 | 1 | 0.004 | -   |
| XL  | Dad3p | 83 | Dam1p | 40  | 6  | 1 | 1 | 0     | +   |
| XL  | Dad3p | 83 | Dam1p | 171 | 5  | 1 | 1 | 0     | -   |
| XL  | Dad3p | 83 | Dam1p | 252 | 2  | 1 | 1 | 0.003 | -   |
| XL  | Dad3p | 83 | Dam1p | 256 | 13 | 1 | 1 | 0.001 | -   |
| XL  | Dad3p | 83 | Dam1p | 307 | 8  | 1 | 1 | 0     | -   |
| XL  | Dad3p | 83 | Duo1p | 2   | 11 | 1 | 1 | 0     | -   |

|    |       |    |        |     |    |   |   |       |     |
|----|-------|----|--------|-----|----|---|---|-------|-----|
| XL | Dad3p | 83 | Duo1p  | 14  | 31 | 1 | 1 | 0     | +/- |
| XL | Dad3p | 83 | Duo1p  | 33  | 13 | 1 | 1 | 0     | +/- |
| XL | Dad3p | 83 | Duo1p  | 36  | 27 | 1 | 1 | 0     | +/- |
| XL | Dad3p | 83 | Duo1p  | 122 | 7  | 1 | 1 | 0.002 | -   |
| XL | Dad3p | 83 | Duo1p  | 131 | 9  | 1 | 1 | 0     | -   |
| XL | Dad3p | 83 | Duo1p  | 159 | 14 | 1 | 1 | 0     | +/- |
| XL | Dad3p | 83 | Duo1p  | 169 | 9  | 1 | 1 | 0.003 | -   |
| XL | Dad3p | 83 | Duo1p  | 174 | 2  | 1 | 1 | 0.003 | -   |
| XL | Dad3p | 83 | Duo1p  | 215 | 36 | 1 | 1 | 0.001 | -   |
| XL | Dad3p | 83 | Duo1p  | 236 | 17 | 1 | 1 | 0.002 | -   |
| XL | Dad3p | 83 | Hsk3p  | 5   | 6  | 1 | 1 | 0.001 | -   |
| XL | Dad3p | 83 | Hsk3p  | 28  | 6  | 1 | 1 | 0     | -   |
| XL | Dad3p | 83 | Hsk3p  | 35  | 4  | 1 | 1 | 0     | -   |
| XL | Dad3p | 83 | Spc19p | 44  | 11 | 1 | 1 | 0     | -   |
| XL | Dad3p | 83 | Spc19p | 59  | 5  | 1 | 1 | 0     | -   |
| XL | Dad3p | 83 | Spc19p | 76  | 4  | 1 | 1 | 0.001 | -   |
| XL | Dad3p | 83 | Spc19p | 104 | 6  | 1 | 1 | 0     | +/- |
| XL | Dad3p | 83 | Spc34p | 46  | 3  | 1 | 1 | 0.002 | -   |
| XL | Dad3p | 83 | Spc34p | 105 | 2  | 1 | 1 | 0.003 | -   |
| XL | Dad3p | 83 | Spc34p | 249 | 2  | 1 | 1 | 0.002 | -   |
| XL | Dad3p | 94 | Ask1p  | 1   | 1  | 1 | 1 | 0     | -   |
| XL | Dad3p | 94 | Ask1p  | 86  | 2  | 1 | 1 | 0.001 | -   |
| XL | Dad3p | 94 | Ask1p  | 151 | 2  | 1 | 1 | 0     | +   |
| XL | Dad3p | 94 | Ask1p  | 198 | 1  | 1 | 1 | 0     | +   |
| XL | Dad3p | 94 | Ask1p  | 225 | 4  | 1 | 1 | 0.001 | +   |
| XL | Dad3p | 94 | Ask1p  | 260 | 4  | 1 | 1 | 0.006 | -   |
| XL | Dad3p | 94 | Dad1p  | 1   | 23 | 2 | 2 | 0     | +/- |
| XL | Dad3p | 94 | Dad1p  | 11  | 5  | 1 | 1 | 0.001 | -   |
| XL | Dad3p | 94 | Dad1p  | 18  | 6  | 1 | 1 | 0.001 | -   |
| XL | Dad3p | 94 | Dad2p  | 1   | 17 | 2 | 2 | 0     | +/- |
| XL | Dad3p | 94 | Dad2p  | 11  | 1  | 1 | 1 | 0.003 | -   |
| XL | Dad3p | 94 | Dad2p  | 13  | 13 | 2 | 2 | 0.001 | +/- |
| XL | Dad3p | 94 | Dad2p  | 20  | 1  | 1 | 1 | 0.003 | -   |
| XL | Dad3p | 94 | Dad3p  | 94  | 28 | 2 | 2 | 0     | -   |
| XL | Dad3p | 94 | Dad4p  | 1   | 54 | 2 | 2 | 0     | +/- |
| XL | Dad3p | 94 | Dad4p  | 21  | 11 | 2 | 2 | 0     | -   |

|    |       |    |        |     |    |   |   |       |     |
|----|-------|----|--------|-----|----|---|---|-------|-----|
| XL | Dad3p | 94 | Dad4p  | 42  | 8  | 1 | 1 | 0     | +/- |
| XL | Dad3p | 94 | Dam1p  | 40  | 3  | 1 | 1 | 0     | +   |
| XL | Dad3p | 94 | Dam1p  | 171 | 4  | 1 | 1 | 0     | -   |
| XL | Dad3p | 94 | Dam1p  | 256 | 7  | 1 | 1 | 0     | -   |
| XL | Dad3p | 94 | Duo1p  | 2   | 2  | 1 | 1 | 0     | -   |
| XL | Dad3p | 94 | Duo1p  | 33  | 17 | 1 | 1 | 0.001 | +/- |
| XL | Dad3p | 94 | Duo1p  | 36  | 9  | 1 | 1 | 0.001 | +/- |
| XL | Dad3p | 94 | Duo1p  | 122 | 1  | 1 | 1 | 0.003 | -   |
| XL | Dad3p | 94 | Duo1p  | 131 | 1  | 1 | 1 | 0.003 | -   |
| XL | Dad3p | 94 | Duo1p  | 159 | 6  | 2 | 2 | 0     | -   |
| XL | Dad3p | 94 | Duo1p  | 169 | 1  | 1 | 1 | 0.005 | -   |
| XL | Dad3p | 94 | Duo1p  | 174 | 1  | 1 | 1 | 0.004 | -   |
| XL | Dad3p | 94 | Duo1p  | 177 | 7  | 1 | 1 | 0.003 | -   |
| XL | Dad3p | 94 | Duo1p  | 183 | 3  | 1 | 1 | 0.001 | -   |
| XL | Dad3p | 94 | Duo1p  | 215 | 8  | 1 | 1 | 0.003 | -   |
| XL | Dad3p | 94 | Duo1p  | 236 | 15 | 1 | 1 | 0.001 | -   |
| XL | Dad3p | 94 | Hsk3p  | 5   | 8  | 2 | 2 | 0     | -   |
| XL | Dad3p | 94 | Hsk3p  | 28  | 21 | 2 | 2 | 0     | +/- |
| XL | Dad3p | 94 | Hsk3p  | 35  | 10 | 1 | 1 | 0     | -   |
| XL | Dad3p | 94 | Spc19p | 1   | 1  | 1 | 1 | 0.001 | -   |
| XL | Dad3p | 94 | Spc19p | 2   | 1  | 1 | 1 | 0.001 | -   |
| XL | Dad3p | 94 | Spc19p | 44  | 1  | 1 | 1 | 0.003 | -   |
| XL | Dad3p | 94 | Spc19p | 59  | 3  | 1 | 1 | 0.001 | -   |
| XL | Dad3p | 94 | Spc19p | 76  | 1  | 1 | 1 | 0.005 | -   |
| XL | Dad3p | 94 | Spc34p | 70  | 1  | 1 | 1 | 0.004 | -   |
| XL | Dad3p | 94 | Spc34p | 105 | 3  | 1 | 1 | 0.003 | -   |
| XL | Dad3p | 94 | Spc34p | 249 | 2  | 1 | 1 | 0.003 | -   |
| XL | Dad4p | 1  | Ask1p  | 1   | 10 | 2 | 2 | 0     | -   |
| XL | Dad4p | 1  | Ask1p  | 151 | 4  | 1 | 1 | 0     | +/- |
| XL | Dad4p | 1  | Ask1p  | 225 | 8  | 1 | 1 | 0     | +/- |
| XL | Dad4p | 1  | Dad2p  | 1   | 81 | 2 | 2 | 0     | +/- |
| XL | Dad4p | 1  | Dad2p  | 11  | 12 | 1 | 1 | 0     | +/- |
| XL | Dad4p | 1  | Dad2p  | 13  | 9  | 1 | 1 | 0     | -   |
| XL | Dad4p | 1  | Dad2p  | 20  | 2  | 1 | 1 | 0.001 | -   |
| XL | Dad4p | 1  | Dad4p  | 1   | 21 | 1 | 1 | 0     | +/- |
| XL | Dad4p | 1  | Dad4p  | 2   | 4  | 1 | 1 | 0     | +   |

|    |       |    |        |     |    |   |   |       |     |
|----|-------|----|--------|-----|----|---|---|-------|-----|
| XL | Dad4p | 1  | Dad4p  | 21  | 16 | 1 | 1 | 0.001 | +/- |
| XL | Dad4p | 1  | Dam1p  | 5   | 4  | 1 | 1 | 0     | +/- |
| XL | Dad4p | 1  | Dam1p  | 7   | 15 | 1 | 1 | 0.002 | +/- |
| XL | Dad4p | 1  | Dam1p  | 40  | 6  | 1 | 1 | 0     | +   |
| XL | Dad4p | 1  | Dam1p  | 252 | 9  | 1 | 1 | 0     | -   |
| XL | Dad4p | 1  | Dam1p  | 256 | 5  | 1 | 1 | 0.001 | +/- |
| XL | Dad4p | 1  | Dam1p  | 307 | 13 | 1 | 1 | 0.001 | +/- |
| XL | Dad4p | 1  | Dam1p  | 330 | 5  | 1 | 1 | 0     | -   |
| XL | Dad4p | 1  | Duo1p  | 33  | 19 | 1 | 1 | 0     | +/- |
| XL | Dad4p | 1  | Duo1p  | 36  | 4  | 1 | 1 | 0.001 | +   |
| XL | Dad4p | 1  | Duo1p  | 73  | 2  | 1 | 1 | 0.004 | -   |
| XL | Dad4p | 1  | Duo1p  | 131 | 2  | 1 | 1 | 0.003 | -   |
| XL | Dad4p | 1  | Duo1p  | 169 | 3  | 1 | 1 | 0.003 | -   |
| XL | Dad4p | 1  | Duo1p  | 177 | 4  | 1 | 1 | 0.005 | -   |
| XL | Dad4p | 1  | Duo1p  | 215 | 13 | 1 | 1 | 0.001 | -   |
| XL | Dad4p | 1  | Hsk3p  | 5   | 28 | 2 | 2 | 0     | +/- |
| XL | Dad4p | 1  | Spc34p | 46  | 1  | 1 | 1 | 0.002 | -   |
| XL | Dad4p | 1  | Spc34p | 94  | 2  | 1 | 1 | 0     | -   |
| XL | Dad4p | 1  | Spc34p | 243 | 3  | 1 | 1 | 0.002 | -   |
| XL | Dad4p | 1  | Spc34p | 249 | 1  | 1 | 1 | 0.001 | -   |
| XL | Dad4p | 2  | Dam1p  | 1   | 29 | 1 | 0 | 0     | +/- |
| XL | Dad4p | 21 | Dad2p  | 29  | 3  | 1 | 1 | 0.003 | -   |
| XL | Dad4p | 21 | Dad4p  | 21  | 3  | 1 | 1 | 0.005 | -   |
| XL | Dad4p | 21 | Dam1p  | 7   | 15 | 2 | 2 | 0.006 | +/- |
| XL | Dad4p | 21 | Duo1p  | 236 | 3  | 1 | 1 | 0.007 | -   |
| XL | Dad4p | 21 | Hsk3p  | 5   | 3  | 1 | 1 | 0.009 | -   |
| XL | Dad4p | 42 | Hsk3p  | 28  | 28 | 2 | 2 | 0     | +/- |
| XL | Dad4p | 42 | Hsk3p  | 35  | 1  | 1 | 1 | 0     | -   |
| XL | Dam1p | 5  | Spc34p | 2   | 25 | 1 | 1 | 0.001 | +/- |
| XL | Dam1p | 7  | Ask1p  | 86  | 1  | 1 | 1 | 0.003 | -   |
| XL | Dam1p | 7  | Ask1p  | 151 | 6  | 1 | 1 | 0.002 | +   |
| XL | Dam1p | 7  | Ask1p  | 198 | 3  | 1 | 1 | 0     | +   |
| XL | Dam1p | 7  | Dam1p  | 40  | 37 | 2 | 2 | 0     | +/- |
| XL | Dam1p | 7  | Spc34p | 2   | 15 | 2 | 2 | 0.01  | +/- |
| XL | Dam1p | 7  | Spc34p | 25  | 1  | 1 | 1 | 0.003 | +   |
| XL | Dam1p | 40 | Ask1p  | 225 | 3  | 1 | 1 | 0     | +   |

|    |       |     |        |     |    |   |   |       |     |
|----|-------|-----|--------|-----|----|---|---|-------|-----|
| XL | Dam1p | 40  | Spc34p | 1   | 24 | 1 | 1 | 0     | +/- |
| XL | Dam1p | 40  | Spc34p | 2   | 51 | 2 | 2 | 0     | +/- |
| XL | Dam1p | 132 | Ask1p  | 1   | 19 | 3 | 3 | 0     | +/- |
| XL | Dam1p | 132 | Dam1p  | 171 | 2  | 1 | 1 | 0.003 | +/- |
| XL | Dam1p | 138 | Dam1p  | 155 | 3  | 1 | 1 | 0.002 | -   |
| XL | Dam1p | 138 | Dam1p  | 156 | 1  | 1 | 1 | 0.004 | -   |
| XL | Dam1p | 138 | Dam1p  | 171 | 16 | 1 | 1 | 0     | +/- |
| XL | Dam1p | 138 | Dam1p  | 256 | 14 | 1 | 1 | 0     | +/- |
| XL | Dam1p | 138 | Dam1p  | 307 | 4  | 1 | 1 | 0.001 | +/- |
| XL | Dam1p | 155 | Dam1p  | 171 | 27 | 1 | 1 | 0     | +/- |
| XL | Dam1p | 155 | Dam1p  | 241 | 8  | 1 | 1 | 0.003 | -   |
| XL | Dam1p | 155 | Dam1p  | 256 | 10 | 1 | 1 | 0.003 | +/- |
| XL | Dam1p | 155 | Spc34p | 249 | 1  | 1 | 1 | 0.003 | +   |
| XL | Dam1p | 156 | Dam1p  | 171 | 45 | 2 | 2 | 0     | +/- |
| XL | Dam1p | 156 | Dam1p  | 241 | 9  | 1 | 1 | 0.005 | -   |
| XL | Dam1p | 156 | Dam1p  | 252 | 1  | 1 | 1 | 0.006 | -   |
| XL | Dam1p | 156 | Dam1p  | 256 | 7  | 2 | 2 | 0.003 | +/- |
| XL | Dam1p | 156 | Dam1p  | 307 | 4  | 2 | 2 | 0.003 | +/- |
| XL | Dam1p | 166 | Dam1p  | 241 | 7  | 1 | 1 | 0.002 | -   |
| XL | Dam1p | 166 | Dam1p  | 252 | 5  | 1 | 1 | 0     | +/- |
| XL | Dam1p | 166 | Dam1p  | 256 | 9  | 1 | 1 | 0     | +/- |
| XL | Dam1p | 166 | Dam1p  | 307 | 12 | 1 | 1 | 0.001 | +/- |
| XL | Dam1p | 166 | Dam1p  | 320 | 3  | 1 | 1 | 0.007 | -   |
| XL | Dam1p | 166 | Dam1p  | 330 | 3  | 1 | 1 | 0     | -   |
| XL | Dam1p | 171 | Ask1p  | 1   | 12 | 2 | 2 | 0     | +/- |
| XL | Dam1p | 171 | Ask1p  | 23  | 1  | 1 | 1 | 0.001 | -   |
| XL | Dam1p | 171 | Ask1p  | 151 | 1  | 1 | 1 | 0     | -   |
| XL | Dam1p | 171 | Ask1p  | 225 | 5  | 1 | 1 | 0     | +   |
| XL | Dam1p | 171 | Dad2p  | 13  | 13 | 1 | 1 | 0.001 | +/- |
| XL | Dam1p | 171 | Dad2p  | 20  | 7  | 1 | 1 | 0     | +   |
| XL | Dam1p | 171 | Dam1p  | 171 | 9  | 1 | 1 | 0     | +   |
| XL | Dam1p | 171 | Dam1p  | 196 | 2  | 1 | 1 | 0     | +   |
| XL | Dam1p | 171 | Dam1p  | 199 | 13 | 2 | 2 | 0     | +/- |
| XL | Dam1p | 171 | Dam1p  | 233 | 5  | 1 | 1 | 0     | +   |
| XL | Dam1p | 171 | Dam1p  | 241 | 4  | 1 | 1 | 0     | +   |
| XL | Dam1p | 171 | Dam1p  | 252 | 4  | 1 | 1 | 0.009 | -   |

|    |       |     |        |     |    |   |   |       |     |
|----|-------|-----|--------|-----|----|---|---|-------|-----|
| XL | Dam1p | 171 | Dam1p  | 256 | 35 | 1 | 1 | 0     | +/- |
| XL | Dam1p | 171 | Dam1p  | 307 | 21 | 1 | 1 | 0     | +/- |
| XL | Dam1p | 171 | Dam1p  | 320 | 7  | 1 | 1 | 0.005 | +   |
| XL | Dam1p | 171 | Dam1p  | 330 | 10 | 1 | 1 | 0.002 | +/- |
| XL | Dam1p | 171 | Hsk3p  | 28  | 1  | 1 | 1 | 0.007 | -   |
| XL | Dam1p | 171 | Spc34p | 249 | 9  | 1 | 1 | 0     | +   |
| XL | Dam1p | 196 | Dam1p  | 241 | 1  | 1 | 1 | 0.006 | +   |
| XL | Dam1p | 199 | Dam1p  | 256 | 4  | 1 | 1 | 0.007 | +   |
| XL | Dam1p | 233 | Dam1p  | 256 | 4  | 1 | 1 | 0     | +   |
| XL | Dam1p | 241 | Ask1p  | 1   | 8  | 1 | 1 | 0.003 | -   |
| XL | Dam1p | 241 | Dam1p  | 252 | 35 | 1 | 1 | 0     | +/- |
| XL | Dam1p | 241 | Dam1p  | 256 | 46 | 1 | 1 | 0     | +/- |
| XL | Dam1p | 241 | Dam1p  | 307 | 24 | 1 | 1 | 0     | +/- |
| XL | Dam1p | 241 | Dam1p  | 330 | 10 | 1 | 1 | 0.005 | +/- |
| XL | Dam1p | 241 | Spc34p | 46  | 10 | 1 | 1 | 0.005 | -   |
| XL | Dam1p | 241 | Spc34p | 243 | 8  | 1 | 1 | 0.005 | +/- |
| XL | Dam1p | 252 | Ask1p  | 1   | 9  | 1 | 1 | 0.003 | -   |
| XL | Dam1p | 252 | Dad2p  | 1   | 1  | 1 | 1 | 0.003 | -   |
| XL | Dam1p | 252 | Dam1p  | 256 | 80 | 2 | 2 | 0     | +/- |
| XL | Dam1p | 252 | Dam1p  | 307 | 24 | 1 | 1 | 0.001 | +/- |
| XL | Dam1p | 252 | Dam1p  | 320 | 11 | 1 | 1 | 0.005 | -   |
| XL | Dam1p | 252 | Dam1p  | 330 | 17 | 1 | 1 | 0.001 | +/- |
| XL | Dam1p | 252 | Spc34p | 2   | 2  | 1 | 1 | 0.003 | -   |
| XL | Dam1p | 252 | Spc34p | 46  | 4  | 1 | 1 | 0.005 | -   |
| XL | Dam1p | 252 | Spc34p | 70  | 5  | 1 | 1 | 0.003 | -   |
| XL | Dam1p | 256 | Ask1p  | 1   | 5  | 1 | 1 | 0.001 | +/- |
| XL | Dam1p | 256 | Ask1p  | 225 | 3  | 1 | 1 | 0     | +/- |
| XL | Dam1p | 256 | Dad2p  | 13  | 4  | 1 | 1 | 0.003 | -   |
| XL | Dam1p | 256 | Dam1p  | 307 | 82 | 2 | 2 | 0     | +/- |
| XL | Dam1p | 256 | Dam1p  | 320 | 10 | 1 | 1 | 0.002 | +/- |
| XL | Dam1p | 256 | Dam1p  | 330 | 4  | 1 | 1 | 0.001 | -   |
| XL | Dam1p | 256 | Hsk3p  | 28  | 6  | 1 | 1 | 0     | +/- |
| XL | Dam1p | 256 | Spc34p | 46  | 2  | 1 | 1 | 0.001 | -   |
| XL | Dam1p | 256 | Spc34p | 65  | 1  | 1 | 1 | 0.003 | +   |
| XL | Dam1p | 256 | Spc34p | 70  | 3  | 1 | 1 | 0.004 | +   |
| XL | Dam1p | 256 | Spc34p | 126 | 2  | 1 | 1 | 0.004 | -   |

|    |       |     |        |     |    |   |   |       |     |
|----|-------|-----|--------|-----|----|---|---|-------|-----|
| XL | Dam1p | 256 | Spc34p | 169 | 11 | 1 | 1 | 0     | +/- |
| XL | Dam1p | 256 | Spc34p | 243 | 20 | 1 | 1 | 0     | +/- |
| XL | Dam1p | 256 | Spc34p | 249 | 12 | 1 | 1 | 0     | +/- |
| XL | Dam1p | 307 | Ask1p  | 1   | 6  | 1 | 1 | 0.002 | -   |
| XL | Dam1p | 307 | Dam1p  | 320 | 85 | 1 | 1 | 0.001 | +/- |
| XL | Dam1p | 307 | Dam1p  | 330 | 22 | 1 | 1 | 0.002 | +/- |
| XL | Dam1p | 307 | Spc34p | 65  | 9  | 1 | 1 | 0.001 | +/- |
| XL | Dam1p | 307 | Spc34p | 70  | 6  | 1 | 1 | 0.004 | -   |
| XL | Dam1p | 307 | Spc34p | 169 | 7  | 1 | 1 | 0.001 | +/- |
| XL | Dam1p | 307 | Spc34p | 243 | 9  | 1 | 1 | 0.009 | -   |
| XL | Dam1p | 307 | Spc34p | 249 | 15 | 1 | 1 | 0     | +/- |
| XL | Dam1p | 320 | Dam1p  | 330 | 36 | 1 | 1 | 0.004 | +/- |
| XL | Dam1p | 320 | Spc34p | 243 | 3  | 1 | 1 | 0.004 | -   |
| XL | Dam1p | 320 | Spc34p | 249 | 4  | 1 | 1 | 0.003 | -   |
| XL | Dam1p | 330 | Spc34p | 2   | 4  | 1 | 1 | 0.002 | +/- |
| XL | Dam1p | 330 | Spc34p | 243 | 17 | 1 | 1 | 0     | +/- |
| XL | Dam1p | 330 | Spc34p | 249 | 10 | 1 | 1 | 0.002 | -   |
| XL | Dam1p | 331 | Dam1p  | 331 | 2  | 1 | 1 | 0.009 | -   |
| XL | Dam1p | 334 | Ask1p  | 198 | 1  | 1 | 1 | 0.002 | +   |
| XL | Duo1p | 2   | Duo1p  | 2   | 3  | 1 | 1 | 0.003 | -   |
| XL | Duo1p | 14  | Duo1p  | 36  | 2  | 1 | 1 | 0.003 | -   |
| XL | Duo1p | 33  | Dam1p  | 40  | 45 | 2 | 2 | 0     | +/- |
| XL | Duo1p | 33  | Dam1p  | 66  | 6  | 1 | 1 | 0.001 | -   |
| XL | Duo1p | 33  | Duo1p  | 66  | 21 | 2 | 2 | 0.001 | -   |
| XL | Duo1p | 33  | Duo1p  | 73  | 6  | 1 | 1 | 0.003 | -   |
| XL | Duo1p | 33  | Spc34p | 1   | 1  | 1 | 1 | 0.005 | +   |
| XL | Duo1p | 33  | Spc34p | 2   | 17 | 1 | 1 | 0     | +/- |
| XL | Duo1p | 33  | Spc34p | 249 | 5  | 1 | 1 | 0     | +   |
| XL | Duo1p | 36  | Dam1p  | 7   | 6  | 1 | 1 | 0.001 | -   |
| XL | Duo1p | 36  | Dam1p  | 40  | 47 | 2 | 2 | 0     | +/- |
| XL | Duo1p | 36  | Dam1p  | 66  | 15 | 1 | 1 | 0     | +/- |
| XL | Duo1p | 36  | Duo1p  | 66  | 26 | 2 | 2 | 0     | +/- |
| XL | Duo1p | 36  | Spc34p | 1   | 8  | 1 | 1 | 0     | -   |
| XL | Duo1p | 36  | Spc34p | 2   | 39 | 1 | 1 | 0     | +/- |
| XL | Duo1p | 36  | Spc34p | 70  | 1  | 1 | 1 | 0.008 | -   |
| XL | Duo1p | 36  | Spc34p | 249 | 4  | 1 | 1 | 0.006 | +   |



|     |       |     |        |     |    |   |   |       |     |
|-----|-------|-----|--------|-----|----|---|---|-------|-----|
| XL  | Duo1p | 66  | Ask1p  | 151 | 1  | 1 | 1 | 0     | +   |
| XL  | Duo1p | 66  | Dam1p  | 7   | 4  | 1 | 1 | 0.006 | -   |
| XL  | Duo1p | 66  | Dam1p  | 40  | 5  | 1 | 1 | 0     | +/- |
| XL  | Duo1p | 66  | Hsk3p  | 5   | 7  | 1 | 1 | 0.001 | -   |
| XL  | Duo1p | 66  | Spc34p | 1   | 38 | 2 | 2 | 0     | +/- |
| XL  | Duo1p | 66  | Spc34p | 2   | 78 | 2 | 2 | 0     | +/- |
| XL  | Duo1p | 66  | Spc34p | 249 | 1  | 1 | 1 | 0.001 | +   |
| XL  | Duo1p | 73  | Spc34p | 1   | 4  | 1 | 1 | 0.001 | -   |
| XL  | Duo1p | 73  | Spc34p | 2   | 12 | 1 | 1 | 0.002 | +/- |
| XL  | Duo1p | 79  | Dad2p  | 88  | 3  | 2 | 2 | 0.001 | -   |
| XL  | Duo1p | 79  | Spc34p | 169 | 1  | 1 | 1 | 0.004 | -   |
| XL  | Duo1p | 86  | Dad2p  | 88  | 6  | 1 | 1 | 0     | -   |
| XL  | Duo1p | 86  | Dad2p  | 106 | 1  | 1 | 1 | 0.002 | -   |
| XL  | Duo1p | 86  | Duo1p  | 131 | 1  | 1 | 1 | 0.006 | -   |
| XL  | Duo1p | 122 | Ask1p  | 1   | 5  | 1 | 1 | 0     | +/- |
| XL  | Duo1p | 122 | Ask1p  | 6   | 1  | 1 | 1 | 0.001 | -   |
| XL  | Duo1p | 122 | Dam1p  | 171 | 4  | 1 | 1 | 0.001 | -   |
| XL  | Duo1p | 122 | Duo1p  | 159 | 2  | 1 | 1 | 0.003 | -   |
| XL  | Duo1p | 122 | Duo1p  | 215 | 8  | 1 | 1 | 0.004 | -   |
| XL  | Duo1p | 131 | Dam1p  | 132 | 11 | 1 | 1 | 0.001 | +/- |
| XL  | Duo1p | 131 | Dam1p  | 138 | 15 | 1 | 1 | 0     | +/- |
| XL  | Duo1p | 131 | Duo1p  | 131 | 1  | 1 | 1 | 0.001 | -   |
| XL* | Duo1p | 131 | Duo1p  | 159 | 91 | 1 | 1 | 0     | +/- |
| XL  | Duo1p | 131 | Duo1p  | 161 | 6  | 1 | 1 | 0.003 | -   |
| XL  | Duo1p | 131 | Duo1p  | 236 | 1  | 1 | 1 | 0.001 | -   |
| XL  | Duo1p | 131 | Spc34p | 249 | 4  | 1 | 1 | 0.001 | -   |
| XL  | Duo1p | 159 | Dad2p  | 13  | 1  | 1 | 1 | 0     | -   |
| XL  | Duo1p | 159 | Dam1p  | 132 | 44 | 1 | 1 | 0     | +/- |
| XL  | Duo1p | 159 | Dam1p  | 138 | 50 | 1 | 1 | 0     | +/- |
| XL  | Duo1p | 159 | Dam1p  | 156 | 1  | 1 | 1 | 0.005 | -   |
| XL  | Duo1p | 159 | Dam1p  | 166 | 2  | 1 | 1 | 0.002 | -   |
| XL  | Duo1p | 159 | Dam1p  | 171 | 10 | 1 | 1 | 0     | +/- |
| XL  | Duo1p | 159 | Dam1p  | 241 | 7  | 1 | 1 | 0     | -   |
| XL  | Duo1p | 159 | Dam1p  | 252 | 12 | 1 | 1 | 0     | +/- |
| XL  | Duo1p | 159 | Dam1p  | 256 | 20 | 1 | 1 | 0     | +/- |
| XL  | Duo1p | 159 | Dam1p  | 307 | 10 | 1 | 1 | 0.003 | +/- |

|     |       |     |        |     |    |   |   |       |     |
|-----|-------|-----|--------|-----|----|---|---|-------|-----|
| XL* | Duo1p | 159 | Duo1p  | 161 | 12 | 1 | 1 | 0     | +/- |
| XL  | Duo1p | 159 | Duo1p  | 169 | 22 | 1 | 1 | 0.001 | +/- |
| XL  | Duo1p | 159 | Duo1p  | 215 | 12 | 1 | 1 | 0.001 | -   |
| XL  | Duo1p | 159 | Duo1p  | 236 | 19 | 1 | 1 | 0     | +/- |
| XL  | Duo1p | 159 | Spc34p | 46  | 15 | 1 | 1 | 0     | +/- |
| XL  | Duo1p | 159 | Spc34p | 249 | 1  | 1 | 1 | 0.004 | +   |
| XL  | Duo1p | 160 | Dam1p  | 256 | 2  | 1 | 1 | 0.006 | +/- |
| XL  | Duo1p | 160 | Duo1p  | 177 | 3  | 1 | 1 | 0.002 | +/- |
| XL  | Duo1p | 160 | Spc34p | 249 | 2  | 1 | 1 | 0.002 | +   |
| XL  | Duo1p | 161 | Dam1p  | 171 | 4  | 1 | 1 | 0.003 | -   |
| XL  | Duo1p | 161 | Dam1p  | 252 | 17 | 2 | 2 | 0.002 | +/- |
| XL  | Duo1p | 161 | Dam1p  | 256 | 11 | 2 | 2 | 0     | +/- |
| XL  | Duo1p | 161 | Dam1p  | 307 | 11 | 2 | 2 | 0.002 | +/- |
| XL  | Duo1p | 161 | Duo1p  | 169 | 13 | 2 | 2 | 0.004 | +/- |
| XL  | Duo1p | 161 | Duo1p  | 174 | 1  | 1 | 1 | 0.009 | -   |
| XL  | Duo1p | 161 | Duo1p  | 183 | 23 | 1 | 1 | 0.002 | +/- |
| XL  | Duo1p | 161 | Duo1p  | 215 | 13 | 2 | 2 | 0.007 | -   |
| XL  | Duo1p | 161 | Duo1p  | 236 | 20 | 2 | 2 | 0.006 | +/- |
| XL  | Duo1p | 169 | Dad2p  | 1   | 5  | 1 | 1 | 0.002 | -   |
| XL  | Duo1p | 169 | Dam1p  | 138 | 78 | 2 | 2 | 0     | +/- |
| XL  | Duo1p | 169 | Dam1p  | 155 | 28 | 1 | 1 | 0.006 | +/- |
| XL  | Duo1p | 169 | Dam1p  | 156 | 37 | 2 | 2 | 0.004 | +/- |
| XL  | Duo1p | 169 | Dam1p  | 166 | 47 | 3 | 3 | 0     | +/- |
| XL  | Duo1p | 169 | Dam1p  | 171 | 38 | 1 | 1 | 0     | +/- |
| XL  | Duo1p | 169 | Dam1p  | 252 | 7  | 1 | 1 | 0.01  | +/- |
| XL  | Duo1p | 169 | Dam1p  | 256 | 5  | 1 | 1 | 0.003 | -   |
| XL  | Duo1p | 169 | Dam1p  | 307 | 8  | 1 | 1 | 0.009 | +/- |
| XL  | Duo1p | 169 | Duo1p  | 174 | 20 | 1 | 1 | 0.001 | +/- |
| XL  | Duo1p | 169 | Duo1p  | 177 | 60 | 1 | 1 | 0.001 | +/- |
| XL  | Duo1p | 169 | Duo1p  | 183 | 97 | 1 | 1 | 0     | +/- |
| XL  | Duo1p | 169 | Duo1p  | 215 | 21 | 1 | 1 | 0.006 | -   |
| XL  | Duo1p | 169 | Duo1p  | 236 | 29 | 1 | 1 | 0.005 | -   |
| XL  | Duo1p | 169 | Spc34p | 243 | 5  | 1 | 1 | 0.006 | +   |
| XL  | Duo1p | 169 | Spc34p | 249 | 7  | 1 | 1 | 0.002 | +   |
| XL  | Duo1p | 174 | Dam1p  | 155 | 35 | 2 | 2 | 0     | +/- |
| XL  | Duo1p | 174 | Dam1p  | 156 | 17 | 3 | 3 | 0     | +/- |

|    |       |     |        |     |     |   |   |       |     |
|----|-------|-----|--------|-----|-----|---|---|-------|-----|
| XL | Duo1p | 174 | Dam1p  | 171 | 10  | 1 | 1 | 0     | +/- |
| XL | Duo1p | 174 | Dam1p  | 233 | 1   | 1 | 1 | 0.002 | +   |
| XL | Duo1p | 174 | Dam1p  | 256 | 4   | 1 | 1 | 0.002 | +/- |
| XL | Duo1p | 174 | Dam1p  | 307 | 7   | 1 | 1 | 0.006 | +   |
| XL | Duo1p | 174 | Duo1p  | 215 | 24  | 1 | 1 | 0     | +/- |
| XL | Duo1p | 174 | Duo1p  | 236 | 3   | 1 | 1 | 0.007 | +/- |
| XL | Duo1p | 177 | Ask1p  | 225 | 1   | 1 | 1 | 0.004 | +   |
| XL | Duo1p | 177 | Dam1p  | 155 | 50  | 3 | 3 | 0     | +/- |
| XL | Duo1p | 177 | Dam1p  | 156 | 40  | 4 | 4 | 0     | +/- |
| XL | Duo1p | 177 | Dam1p  | 166 | 9   | 1 | 1 | 0     | +/- |
| XL | Duo1p | 177 | Dam1p  | 171 | 34  | 2 | 2 | 0     | +/- |
| XL | Duo1p | 177 | Dam1p  | 241 | 5   | 1 | 1 | 0.002 | +/- |
| XL | Duo1p | 177 | Dam1p  | 252 | 5   | 1 | 1 | 0.005 | +/- |
| XL | Duo1p | 177 | Dam1p  | 256 | 7   | 1 | 1 | 0.002 | +/- |
| XL | Duo1p | 177 | Dam1p  | 307 | 4   | 1 | 1 | 0.005 | +   |
| XL | Duo1p | 177 | Duo1p  | 177 | 1   | 1 | 1 | 0.006 | +   |
| XL | Duo1p | 177 | Duo1p  | 215 | 29  | 1 | 1 | 0     | +/- |
| XL | Duo1p | 177 | Duo1p  | 236 | 13  | 1 | 1 | 0     | +/- |
| XL | Duo1p | 177 | Spc34p | 243 | 1   | 1 | 1 | 0.001 | +   |
| XL | Duo1p | 177 | Spc34p | 249 | 1   | 1 | 1 | 0.002 | +   |
| XL | Duo1p | 183 | Dam1p  | 138 | 20  | 1 | 1 | 0.001 | +/- |
| XL | Duo1p | 183 | Dam1p  | 155 | 79  | 1 | 1 | 0.001 | +/- |
| XL | Duo1p | 183 | Dam1p  | 156 | 13  | 2 | 2 | 0.002 | +/- |
| XL | Duo1p | 183 | Dam1p  | 166 | 23  | 1 | 1 | 0.001 | +/- |
| XL | Duo1p | 183 | Dam1p  | 171 | 59  | 1 | 1 | 0     | +/- |
| XL | Duo1p | 183 | Dam1p  | 256 | 31  | 1 | 1 | 0     | +/- |
| XL | Duo1p | 183 | Duo1p  | 215 | 103 | 1 | 1 | 0     | +/- |
| XL | Duo1p | 183 | Duo1p  | 222 | 15  | 1 | 1 | 0.004 | +/- |
| XL | Duo1p | 183 | Duo1p  | 236 | 75  | 1 | 1 | 0.002 | +/- |
| XL | Duo1p | 183 | Spc34p | 249 | 1   | 1 | 1 | 0.004 | +   |
| XL | Duo1p | 215 | Ask1p  | 1   | 6   | 1 | 1 | 0.005 | -   |
| XL | Duo1p | 215 | Dam1p  | 155 | 24  | 1 | 1 | 0.005 | -   |
| XL | Duo1p | 215 | Dam1p  | 156 | 19  | 1 | 1 | 0.003 | -   |
| XL | Duo1p | 215 | Dam1p  | 166 | 26  | 1 | 1 | 0     | -   |
| XL | Duo1p | 215 | Dam1p  | 171 | 38  | 1 | 1 | 0     | +/- |
| XL | Duo1p | 215 | Dam1p  | 196 | 2   | 1 | 1 | 0.006 | +   |

|    |       |     |        |     |     |   |   |       |     |
|----|-------|-----|--------|-----|-----|---|---|-------|-----|
| XL | Duo1p | 215 | Dam1p  | 199 | 1   | 1 | 1 | 0.009 | +   |
| XL | Duo1p | 215 | Dam1p  | 233 | 4   | 1 | 1 | 0.004 | +   |
| XL | Duo1p | 215 | Dam1p  | 241 | 4   | 1 | 1 | 0.006 | -   |
| XL | Duo1p | 215 | Dam1p  | 252 | 10  | 1 | 1 | 0.003 | -   |
| XL | Duo1p | 215 | Dam1p  | 307 | 12  | 1 | 1 | 0.002 | +/- |
| XL | Duo1p | 215 | Duo1p  | 236 | 103 | 1 | 1 | 0.002 | +/- |
| XL | Duo1p | 215 | Hsk3p  | 28  | 9   | 1 | 1 | 0.002 | -   |
| XL | Duo1p | 215 | Hsk3p  | 67  | 4   | 1 | 1 | 0.004 | -   |
| XL | Duo1p | 215 | Spc34p | 46  | 7   | 1 | 1 | 0.003 | -   |
| XL | Duo1p | 215 | Spc34p | 243 | 2   | 1 | 1 | 0.006 | +   |
| XL | Duo1p | 222 | Duo1p  | 236 | 17  | 2 | 2 | 0.01  | +/- |
| XL | Duo1p | 236 | Ask1p  | 198 | 1   | 1 | 1 | 0.001 | -   |
| XL | Duo1p | 236 | Ask1p  | 225 | 8   | 1 | 1 | 0.003 | -   |
| XL | Duo1p | 236 | Dad2p  | 1   | 1   | 1 | 1 | 0.002 | -   |
| XL | Duo1p | 236 | Dad2p  | 11  | 1   | 1 | 1 | 0.006 | -   |
| XL | Duo1p | 236 | Dad2p  | 20  | 5   | 1 | 1 | 0.005 | -   |
| XL | Duo1p | 236 | Dad2p  | 29  | 11  | 1 | 1 | 0.002 | -   |
| XL | Duo1p | 236 | Dam1p  | 138 | 7   | 1 | 1 | 0.001 | -   |
| XL | Duo1p | 236 | Dam1p  | 156 | 8   | 2 | 2 | 0.003 | -   |
| XL | Duo1p | 236 | Dam1p  | 166 | 10  | 1 | 1 | 0.003 | -   |
| XL | Duo1p | 236 | Dam1p  | 171 | 31  | 1 | 1 | 0     | +/- |
| XL | Duo1p | 236 | Dam1p  | 233 | 2   | 1 | 1 | 0     | +   |
| XL | Duo1p | 236 | Dam1p  | 252 | 3   | 1 | 1 | 0.001 | -   |
| XL | Duo1p | 236 | Dam1p  | 256 | 22  | 1 | 1 | 0.002 | +/- |
| XL | Duo1p | 236 | Dam1p  | 307 | 4   | 1 | 1 | 0.002 | +   |
| XL | Duo1p | 236 | Dam1p  | 335 | 1   | 1 | 1 | 0.002 | +   |
| XL | Duo1p | 236 | Duo1p  | 236 | 3   | 2 | 2 | 0.002 | +   |
| XL | Duo1p | 236 | Hsk3p  | 28  | 5   | 1 | 1 | 0     | -   |
| XL | Duo1p | 236 | Spc34p | 65  | 8   | 2 | 2 | 0.001 | -   |
| XL | Duo1p | 236 | Spc34p | 70  | 24  | 1 | 1 | 0.001 | -   |
| XL | Duo1p | 236 | Spc34p | 169 | 9   | 1 | 1 | 0.001 | -   |
| XL | Duo1p | 236 | Spc34p | 243 | 5   | 1 | 1 | 0.003 | -   |
| XL | Hsk3p | 5   | Dad2p  | 1   | 5   | 1 | 1 | 0.001 | -   |
| XL | Hsk3p | 5   | Dad2p  | 13  | 6   | 1 | 1 | 0.002 | -   |
| XL | Hsk3p | 5   | Hsk3p  | 5   | 24  | 1 | 1 | 0     | -   |
| XL | Hsk3p | 5   | Hsk3p  | 35  | 5   | 1 | 1 | 0.005 | -   |

|    |        |    |        |     |    |   |   |       |     |
|----|--------|----|--------|-----|----|---|---|-------|-----|
| XL | Hsk3p  | 35 | Ask1p  | 1   | 1  | 1 | 1 | 0.003 | -   |
| XL | Hsk3p  | 67 | Spc34p | 46  | 4  | 1 | 1 | 0     | -   |
| XL | Spc19p | 1  | Ask1p  | 225 | 3  | 1 | 1 | 0     | +   |
| XL | Spc19p | 1  | Dad2p  | 1   | 2  | 1 | 1 | 0     | -   |
| XL | Spc19p | 1  | Dad2p  | 13  | 59 | 4 | 4 | 0     | +/- |
| XL | Spc19p | 1  | Dad4p  | 1   | 1  | 1 | 1 | 0.001 | -   |
| XL | Spc19p | 1  | Dam1p  | 5   | 2  | 1 | 1 | 0.001 | +   |
| XL | Spc19p | 1  | Dam1p  | 7   | 6  | 1 | 1 | 0     | +/- |
| XL | Spc19p | 1  | Dam1p  | 307 | 3  | 1 | 1 | 0.001 | -   |
| XL | Spc19p | 1  | Dam1p  | 330 | 1  | 1 | 1 | 0.005 | -   |
| XL | Spc19p | 1  | Duo1p  | 236 | 2  | 1 | 1 | 0.002 | -   |
| XL | Spc19p | 1  | Hsk3p  | 1   | 3  | 1 | 1 | 0     | +/- |
| XL | Spc19p | 1  | Hsk3p  | 2   | 5  | 1 | 1 | 0.003 | +/- |
| XL | Spc19p | 1  | Hsk3p  | 5   | 9  | 1 | 1 | 0     | -   |
| XL | Spc19p | 2  | Dad2p  | 13  | 61 | 3 | 3 | 0     | +/- |
| XL | Spc19p | 2  | Dam1p  | 1   | 3  | 1 | 1 | 0     | +   |
| XL | Spc19p | 2  | Dam1p  | 7   | 8  | 1 | 1 | 0     | +/- |
| XL | Spc19p | 2  | Dam1p  | 252 | 1  | 1 | 1 | 0     | -   |
| XL | Spc19p | 2  | Dam1p  | 330 | 1  | 1 | 1 | 0.001 | -   |
| XL | Spc19p | 2  | Duo1p  | 236 | 2  | 1 | 1 | 0.001 | -   |
| XL | Spc19p | 2  | Hsk3p  | 5   | 11 | 1 | 1 | 0.001 | -   |
| XL | Spc19p | 20 | Dad2p  | 20  | 2  | 1 | 1 | 0     | +/- |
| XL | Spc19p | 20 | Dam1p  | 171 | 1  | 1 | 1 | 0.001 | -   |
| XL | Spc19p | 20 | Dam1p  | 241 | 1  | 1 | 1 | 0.005 | -   |
| XL | Spc19p | 20 | Duo1p  | 215 | 11 | 2 | 2 | 0     | +/- |
| XL | Spc19p | 44 | Dad2p  | 20  | 3  | 1 | 1 | 0.003 | -   |
| XL | Spc19p | 44 | Dam1p  | 241 | 1  | 1 | 1 | 0.005 | +   |
| XL | Spc19p | 44 | Dam1p  | 256 | 9  | 1 | 1 | 0     | +   |
| XL | Spc19p | 44 | Duo1p  | 131 | 3  | 1 | 1 | 0.001 | -   |
| XL | Spc19p | 44 | Duo1p  | 215 | 16 | 1 | 1 | 0     | +/- |
| XL | Spc19p | 44 | Duo1p  | 236 | 12 | 1 | 1 | 0     | +/- |
| XL | Spc19p | 44 | Spc19p | 59  | 21 | 1 | 1 | 0     | +/- |
| XL | Spc19p | 44 | Spc19p | 104 | 1  | 1 | 1 | 0.002 | -   |
| XL | Spc19p | 44 | Spc34p | 79  | 4  | 1 | 1 | 0.001 | -   |
| XL | Spc19p | 44 | Spc34p | 112 | 1  | 1 | 1 | 0.007 | -   |
| XL | Spc19p | 44 | Spc34p | 169 | 3  | 1 | 1 | 0.002 | -   |

|    |        |     |        |     |    |   |   |       |     |
|----|--------|-----|--------|-----|----|---|---|-------|-----|
| XL | Spc19p | 59  | Dad4p  | 1   | 4  | 1 | 1 | 0     | -   |
| XL | Spc19p | 59  | Dam1p  | 256 | 10 | 1 | 1 | 0.002 | +/- |
| XL | Spc19p | 59  | Dam1p  | 307 | 4  | 1 | 1 | 0.003 | +/- |
| XL | Spc19p | 59  | Spc19p | 76  | 5  | 1 | 1 | 0     | -   |
| XL | Spc19p | 59  | Spc19p | 104 | 4  | 1 | 1 | 0     | -   |
| XL | Spc19p | 59  | Spc19p | 146 | 1  | 1 | 1 | 0.002 | +   |
| XL | Spc19p | 59  | Spc34p | 46  | 8  | 1 | 1 | 0.002 | -   |
| XL | Spc19p | 59  | Spc34p | 53  | 35 | 1 | 1 | 0     | +/- |
| XL | Spc19p | 59  | Spc34p | 70  | 6  | 1 | 1 | 0.001 | +/- |
| XL | Spc19p | 59  | Spc34p | 79  | 2  | 1 | 1 | 0.007 | -   |
| XL | Spc19p | 59  | Spc34p | 118 | 11 | 1 | 1 | 0     | +/- |
| XL | Spc19p | 59  | Spc34p | 126 | 17 | 1 | 1 | 0     | +/- |
| XL | Spc19p | 59  | Spc34p | 169 | 18 | 1 | 1 | 0     | -   |
| XL | Spc19p | 59  | Spc34p | 249 | 4  | 1 | 1 | 0.001 | -   |
| XL | Spc19p | 76  | Dad4p  | 1   | 2  | 1 | 1 | 0.004 | -   |
| XL | Spc19p | 76  | Spc34p | 169 | 5  | 1 | 1 | 0.006 | +   |
| XL | Spc19p | 76  | Spc34p | 198 | 69 | 2 | 2 | 0     | +/- |
| XL | Spc19p | 104 | Ask1p  | 1   | 3  | 1 | 1 | 0.001 | +   |
| XL | Spc19p | 104 | Ask1p  | 151 | 3  | 1 | 1 | 0     | +   |
| XL | Spc19p | 104 | Ask1p  | 198 | 2  | 1 | 1 | 0.001 | +   |
| XL | Spc19p | 104 | Ask1p  | 225 | 11 | 1 | 1 | 0     | +   |
| XL | Spc19p | 104 | Dad2p  | 13  | 3  | 1 | 1 | 0     | +   |
| XL | Spc19p | 104 | Dad2p  | 20  | 4  | 1 | 1 | 0     | +   |
| XL | Spc19p | 104 | Dad4p  | 1   | 4  | 1 | 1 | 0     | +   |
| XL | Spc19p | 104 | Dam1p  | 7   | 4  | 1 | 1 | 0     | +   |
| XL | Spc19p | 104 | Dam1p  | 171 | 5  | 1 | 1 | 0     | +   |
| XL | Spc19p | 104 | Dam1p  | 256 | 10 | 1 | 1 | 0     | +/- |
| XL | Spc19p | 104 | Dam1p  | 307 | 3  | 1 | 1 | 0.002 | -   |
| XL | Spc19p | 104 | Duo1p  | 33  | 3  | 2 | 2 | 0.002 | +   |
| XL | Spc19p | 104 | Duo1p  | 36  | 6  | 1 | 1 | 0     | +   |
| XL | Spc19p | 104 | Duo1p  | 122 | 1  | 1 | 1 | 0.002 | +   |
| XL | Spc19p | 104 | Duo1p  | 169 | 5  | 1 | 1 | 0     | +   |
| XL | Spc19p | 104 | Duo1p  | 177 | 7  | 1 | 1 | 0     | +   |
| XL | Spc19p | 104 | Duo1p  | 183 | 3  | 1 | 1 | 0     | +   |
| XL | Spc19p | 104 | Spc19p | 146 | 52 | 1 | 1 | 0     | +/- |
| XL | Spc19p | 104 | Spc19p | 152 | 5  | 1 | 1 | 0.003 | +/- |

|     |        |     |        |     |    |   |   |       |     |
|-----|--------|-----|--------|-----|----|---|---|-------|-----|
| XL  | Spc19p | 104 | Spc19p | 153 | 25 | 2 | 2 | 0     | +/- |
| XL  | Spc19p | 104 | Spc19p | 158 | 12 | 1 | 1 | 0.002 | +/- |
| XL  | Spc19p | 104 | Spc19p | 163 | 4  | 1 | 1 | 0.004 | -   |
| XL  | Spc19p | 104 | Spc34p | 2   | 6  | 1 | 1 | 0     | +   |
| XL  | Spc19p | 104 | Spc34p | 46  | 1  | 1 | 1 | 0.001 | -   |
| XL  | Spc19p | 104 | Spc34p | 112 | 1  | 1 | 1 | 0.002 | +   |
| XL  | Spc19p | 104 | Spc34p | 198 | 4  | 1 | 1 | 0     | +   |
| XL  | Spc19p | 104 | Spc34p | 243 | 8  | 1 | 1 | 0     | -   |
| XL  | Spc19p | 104 | Spc34p | 249 | 14 | 1 | 1 | 0     | +/- |
| XL  | Spc19p | 104 | Spc34p | 259 | 20 | 1 | 1 | 0     | +/- |
| XL  | Spc19p | 104 | Spc34p | 274 | 75 | 2 | 2 | 0     | +/- |
| XL  | Spc19p | 104 | Spc34p | 278 | 49 | 2 | 2 | 0     | +/- |
| XL  | Spc19p | 104 | Spc34p | 280 | 26 | 2 | 2 | 0     | +/- |
| XL  | Spc19p | 146 | Spc19p | 152 | 2  | 1 | 1 | 0.01  | +   |
| XL  | Spc19p | 146 | Spc19p | 153 | 42 | 2 | 2 | 0     | +/- |
| XL  | Spc19p | 146 | Spc34p | 249 | 15 | 1 | 1 | 0     | +/- |
| XL  | Spc19p | 149 | Spc19p | 153 | 10 | 2 | 2 | 0.007 | +/- |
| XL  | Spc19p | 151 | Spc19p | 158 | 64 | 4 | 4 | 0     | +/- |
| XL* | Spc19p | 152 | Spc19p | 158 | 4  | 1 | 1 | 0.005 | -   |
| XL  | Spc19p | 152 | Spc34p | 249 | 1  | 1 | 1 | 0.01  | -   |
| XL  | Spc19p | 153 | Spc34p | 243 | 1  | 1 | 1 | 0.007 | -   |
| XL  | Spc19p | 153 | Spc34p | 249 | 3  | 1 | 1 | 0.006 | -   |
| XL  | Spc19p | 158 | Dad4p  | 1   | 2  | 1 | 1 | 0     | +   |
| XL  | Spc19p | 158 | Duo1p  | 183 | 4  | 1 | 1 | 0.005 | +   |
| XL  | Spc19p | 158 | Duo1p  | 236 | 4  | 1 | 1 | 0.005 | +   |
| XL  | Spc19p | 158 | Spc34p | 2   | 1  | 1 | 1 | 0.003 | +   |
| XL  | Spc19p | 158 | Spc34p | 65  | 2  | 1 | 1 | 0.003 | +   |
| XL  | Spc19p | 158 | Spc34p | 198 | 25 | 1 | 1 | 0     | +/- |
| XL  | Spc19p | 158 | Spc34p | 249 | 5  | 1 | 1 | 0.004 | +   |
| XL  | Spc19p | 163 | Spc19p | 163 | 1  | 1 | 1 | 0.004 | -   |
| XL  | Spc19p | 163 | Spc34p | 249 | 2  | 1 | 1 | 0.005 | +   |
| XL  | Spc34p | 2   | Spc34p | 249 | 9  | 1 | 1 | 0.001 | +   |
| XL  | Spc34p | 2   | Spc34p | 274 | 2  | 1 | 1 | 0.002 | +   |
| XL  | Spc34p | 25  | Spc34p | 46  | 3  | 1 | 1 | 0.005 | -   |
| XL* | Spc34p | 41  | Spc34p | 46  | 51 | 1 | 1 | 0     | +/- |
| XL  | Spc34p | 46  | Spc34p | 53  | 39 | 1 | 1 | 0.001 | +/- |

|     |        |     |        |     |    |   |   |       |     |
|-----|--------|-----|--------|-----|----|---|---|-------|-----|
| XL  | Spc34p | 46  | Spc34p | 65  | 1  | 1 | 1 | 0.005 | +   |
| XL  | Spc34p | 46  | Spc34p | 70  | 5  | 1 | 1 | 0.007 | +/- |
| XL  | Spc34p | 46  | Spc34p | 88  | 4  | 1 | 1 | 0.003 | -   |
| XL  | Spc34p | 46  | Spc34p | 105 | 3  | 1 | 1 | 0.006 | -   |
| XL  | Spc34p | 53  | Spc34p | 70  | 6  | 1 | 1 | 0.003 | +/- |
| XL  | Spc34p | 53  | Spc34p | 79  | 1  | 1 | 1 | 0.003 | -   |
| XL  | Spc34p | 53  | Spc34p | 126 | 6  | 1 | 1 | 0.003 | +/- |
| XL  | Spc34p | 65  | Spc34p | 79  | 1  | 1 | 1 | 0.002 | -   |
| XL  | Spc34p | 65  | Spc34p | 88  | 23 | 1 | 1 | 0     | +/- |
| XL  | Spc34p | 65  | Spc34p | 105 | 2  | 1 | 1 | 0.005 | +   |
| XL  | Spc34p | 65  | Spc34p | 126 | 7  | 1 | 1 | 0     | -   |
| XL  | Spc34p | 65  | Spc34p | 169 | 25 | 2 | 2 | 0     | +/- |
| XL  | Spc34p | 70  | Spc34p | 70  | 2  | 1 | 1 | 0.001 | -   |
| XL  | Spc34p | 70  | Spc34p | 79  | 9  | 2 | 2 | 0.002 | +/- |
| XL  | Spc34p | 70  | Spc34p | 88  | 26 | 2 | 2 | 0     | +/- |
| XL  | Spc34p | 70  | Spc34p | 105 | 11 | 1 | 1 | 0.002 | +/- |
| XL  | Spc34p | 70  | Spc34p | 169 | 8  | 1 | 1 | 0.002 | +/- |
| XL  | Spc34p | 79  | Spc34p | 118 | 3  | 1 | 1 | 0.004 | -   |
| XL  | Spc34p | 79  | Spc34p | 126 | 3  | 1 | 1 | 0.003 | -   |
| XL  | Spc34p | 79  | Spc34p | 169 | 7  | 1 | 1 | 0.001 | -   |
| XL  | Spc34p | 88  | Spc34p | 105 | 1  | 1 | 1 | 0.005 | -   |
| XL  | Spc34p | 88  | Spc34p | 118 | 15 | 1 | 1 | 0.001 | +/- |
| XL  | Spc34p | 94  | Spc34p | 105 | 14 | 1 | 1 | 0.003 | +/- |
| XL  | Spc34p | 105 | Spc34p | 118 | 13 | 1 | 1 | 0.003 | +/- |
| XL  | Spc34p | 105 | Spc34p | 169 | 8  | 1 | 1 | 0.004 | +/- |
| XL  | Spc34p | 112 | Spc34p | 126 | 63 | 4 | 4 | 0     | +/- |
| XL  | Spc34p | 112 | Spc34p | 243 | 1  | 1 | 1 | 0.002 | -   |
| XL* | Spc34p | 118 | Spc34p | 126 | 30 | 1 | 1 | 0.004 | +/- |
| XL  | Spc34p | 169 | Spc34p | 198 | 8  | 1 | 1 | 0.001 | -   |
| XL  | Spc34p | 169 | Spc34p | 249 | 1  | 1 | 1 | 0.001 | -   |
| XL  | Spc34p | 198 | Spc34p | 249 | 10 | 1 | 1 | 0.001 | -   |
| XL  | Spc34p | 243 | Spc34p | 249 | 31 | 1 | 1 | 0     | +/- |
| XL  | Spc34p | 243 | Spc34p | 274 | 1  | 1 | 1 | 0.006 | +   |
| XL  | Spc34p | 249 | Spc34p | 259 | 29 | 1 | 1 | 0     | +/- |
| XL  | Spc34p | 249 | Spc34p | 274 | 27 | 1 | 1 | 0     | +/- |
| XL  | Spc34p | 249 | Spc34p | 278 | 5  | 1 | 1 | 0.001 | -   |



|     |        |     |        |     |     |   |   |       |     |
|-----|--------|-----|--------|-----|-----|---|---|-------|-----|
| XL  | Spc34p | 259 | Spc34p | 278 | 3   | 1 | 1 | 0.009 | -   |
| XL  | Spc34p | 274 | Spc34p | 278 | 133 | 2 | 2 | 0     | +/- |
| XL  | Spc34p | 274 | Spc34p | 280 | 14  | 2 | 2 | 0.004 | +/- |
| LL  | Ask1p  | 1   | Ask1p  | 6   | 32  | 2 | 2 | 0     | +/- |
| LL* | Ask1p  | 1   | Ask1p  | 12  | 3   | 1 | 1 | 0.006 | -   |
| LL  | Ask1p  | 6   | Ask1p  | 12  | 8   | 1 | 1 | 0     | -   |
| LL  | Ask1p  | 12  | Ask1p  | 23  | 26  | 2 | 2 | 0     | -   |
| LL  | Ask1p  | 196 | Ask1p  | 198 | 14  | 1 | 1 | 0     | +/- |
| LL* | Ask1p  | 222 | Ask1p  | 225 | 1   | 1 | 1 | 0.001 | +   |
| LL  | Ask1p  | 225 | Ask1p  | 253 | 80  | 2 | 2 | 0.002 | +/- |
| LL  | Ask1p  | 253 | Ask1p  | 260 | 472 | 4 | 4 | 0     | +/- |
| LL  | Ask1p  | 253 | Ask1p  | 277 | 2   | 2 | 2 | 0.003 | +/- |
| LL  | Ask1p  | 260 | Ask1p  | 277 | 72  | 2 | 2 | 0     | +/- |
| LL* | Ask1p  | 260 | Ask1p  | 281 | 1   | 1 | 1 | 0.01  | +   |
| LL  | Ask1p  | 277 | Ask1p  | 281 | 198 | 2 | 2 | 0     | +/- |
| LL* | Dad1p  | 1   | Dad1p  | 11  | 90  | 2 | 2 | 0     | +/- |
| LL  | Dad1p  | 11  | Dad1p  | 18  | 101 | 1 | 1 | 0     | +/- |
| LL  | Dad1p  | 92  | Dad1p  | 94  | 100 | 1 | 1 | 0     | +/- |
| LL  | Dad2p  | 13  | Dad2p  | 20  | 36  | 2 | 2 | 0     | +/- |
| LL  | Dad2p  | 87  | Dad2p  | 88  | 12  | 1 | 1 | 0     | +/- |
| LL  | Dad2p  | 88  | Dad2p  | 106 | 13  | 1 | 1 | 0     | -   |
| LL* | Dad3p  | 1   | Dad3p  | 15  | 12  | 1 | 1 | 0.001 | +/- |
| LL* | Dad3p  | 1   | Dad3p  | 17  | 4   | 2 | 2 | 0.004 | -   |
| LL* | Dad3p  | 15  | Dad3p  | 17  | 63  | 3 | 3 | 0     | +/- |
| LL  | Dad3p  | 15  | Dad3p  | 24  | 1   | 1 | 1 | 0.004 | -   |
| LL  | Dad3p  | 17  | Dad3p  | 24  | 29  | 4 | 4 | 0     | +/- |
| LL  | Dad3p  | 24  | Dad3p  | 31  | 24  | 1 | 1 | 0     | +/- |
| LL* | Dad3p  | 72  | Dad3p  | 83  | 30  | 1 | 1 | 0     | -   |
| LL  | Dam1p  | 2   | Dam1p  | 5   | 6   | 2 | 2 | 0.004 | +/- |
| LL  | Dam1p  | 2   | Dam1p  | 7   | 4   | 1 | 1 | 0.002 | +/- |
| LL  | Dam1p  | 5   | Dam1p  | 7   | 8   | 1 | 1 | 0     | +/- |
| LL  | Dam1p  | 132 | Dam1p  | 138 | 22  | 1 | 1 | 0     | +/- |
| LL  | Dam1p  | 153 | Dam1p  | 155 | 5   | 1 | 1 | 0.001 | -   |
| LL  | Dam1p  | 155 | Dam1p  | 156 | 30  | 4 | 4 | 0     | +/- |
| LL  | Dam1p  | 155 | Dam1p  | 166 | 1   | 1 | 1 | 0.005 | -   |
| LL  | Dam1p  | 156 | Dam1p  | 166 | 1   | 1 | 1 | 0.005 | -   |

|     |        |     |        |     |     |   |   |       |     |
|-----|--------|-----|--------|-----|-----|---|---|-------|-----|
| LL  | Dam1p  | 166 | Dam1p  | 171 | 112 | 4 | 4 | 0     | +/- |
| LL  | Dam1p  | 196 | Dam1p  | 199 | 106 | 2 | 2 | 0     | +/- |
| LL  | Dam1p  | 233 | Dam1p  | 241 | 46  | 1 | 1 | 0     | +/- |
| LL  | Dam1p  | 330 | Dam1p  | 331 | 5   | 1 | 1 | 0     | +/- |
| LL  | Dam1p  | 331 | Dam1p  | 334 | 3   | 2 | 2 | 0     | +/- |
| LL  | Dam1p  | 334 | Dam1p  | 335 | 55  | 2 | 2 | 0     | +/- |
| LL  | Duo1p  | 2   | Duo1p  | 14  | 10  | 1 | 1 | 0.002 | -   |
| LL  | Duo1p  | 33  | Duo1p  | 36  | 212 | 1 | 1 | 0     | +/- |
| LL  | Duo1p  | 66  | Duo1p  | 73  | 22  | 1 | 1 | 0     | +/- |
| LL  | Duo1p  | 73  | Duo1p  | 79  | 9   | 1 | 1 | 0.001 | +/- |
| LL  | Duo1p  | 79  | Duo1p  | 86  | 46  | 2 | 2 | 0     | -   |
| LL* | Duo1p  | 131 | Duo1p  | 159 | 1   | 1 | 1 | 0.01  | -   |
| LL  | Duo1p  | 159 | Duo1p  | 160 | 14  | 1 | 1 | 0     | +/- |
| LL* | Duo1p  | 159 | Duo1p  | 161 | 7   | 1 | 1 | 0     | -   |
| LL  | Duo1p  | 160 | Duo1p  | 161 | 8   | 1 | 1 | 0     | +/- |
| LL  | Duo1p  | 174 | Duo1p  | 177 | 196 | 1 | 1 | 0     | +/- |
| LL  | Duo1p  | 177 | Duo1p  | 183 | 47  | 1 | 1 | 0     | +/- |
| LL  | Hsk3p  | 1   | Hsk3p  | 5   | 2   | 1 | 1 | 0.009 | +   |
| LL  | Hsk3p  | 28  | Hsk3p  | 35  | 37  | 1 | 1 | 0     | +/- |
| LL  | Spc19p | 76  | Spc19p | 79  | 29  | 1 | 1 | 0.001 | +/- |
| LL  | Spc19p | 103 | Spc19p | 104 | 69  | 3 | 3 | 0     | +/- |
| LL  | Spc19p | 146 | Spc19p | 147 | 37  | 3 | 3 | 0     | +/- |
| LL  | Spc19p | 146 | Spc19p | 149 | 95  | 2 | 2 | 0     | +/- |
| LL  | Spc19p | 146 | Spc19p | 151 | 2   | 1 | 1 | 0.004 | -   |
| LL  | Spc19p | 147 | Spc19p | 149 | 20  | 1 | 1 | 0     | +/- |
| LL  | Spc19p | 152 | Spc19p | 153 | 7   | 3 | 3 | 0.001 | -   |
| LL* | Spc19p | 152 | Spc19p | 158 | 1   | 1 | 1 | 0     | +   |
| LL  | Spc19p | 158 | Spc19p | 163 | 3   | 2 | 2 | 0.003 | -   |
| LL  | Spc19p | 158 | Spc19p | 165 | 1   | 1 | 1 | 0.005 | +   |
| LL  | Spc19p | 163 | Spc19p | 165 | 3   | 1 | 1 | 0.002 | +/- |
| LL  | Spc34p | 25  | Spc34p | 41  | 22  | 1 | 1 | 0     | +/- |
| LL* | Spc34p | 41  | Spc34p | 46  | 1   | 1 | 1 | 0     | +   |
| LL  | Spc34p | 53  | Spc34p | 65  | 9   | 1 | 1 | 0.002 | +/- |
| LL  | Spc34p | 65  | Spc34p | 70  | 96  | 2 | 2 | 0     | +/- |
| LL  | Spc34p | 105 | Spc34p | 112 | 16  | 1 | 1 | 0     | +/- |
| LL  | Spc34p | 112 | Spc34p | 118 | 118 | 5 | 5 | 0     | +/- |

|                                                                       |        |     |        |     |    |   |   |       |     |
|-----------------------------------------------------------------------|--------|-----|--------|-----|----|---|---|-------|-----|
| LL                                                                    | Spc34p | 118 | Spc34p | 126 | 2  | 1 | 1 | 0.006 | -   |
| LL                                                                    | Spc34p | 162 | Spc34p | 169 | 2  | 1 | 1 | 0     | -   |
| LL                                                                    | Spc34p | 243 | Spc34p | 248 | 6  | 1 | 1 | 0.001 | +/- |
| LL                                                                    | Spc34p | 248 | Spc34p | 249 | 50 | 3 | 3 | 0     | +/- |
| LL                                                                    | Spc34p | 278 | Spc34p | 280 | 5  | 2 | 2 | 0.005 | -   |
| <b>XL=cross-link; LL=loop-link; *Identified as both a XL and a LL</b> |        |     |        |     |    |   |   |       |     |

**Supplementary Table 7: Relationships within the Dam1 complex that do not change in the presence versus the absence of microtubules.**

| Interaction Pair | Multiple cross-links | Few/no cross-links |
|------------------|----------------------|--------------------|
| Ask1p/Dam1p      | X                    |                    |
| Dad1p/Dad3p      | X                    |                    |
| Dad1p/Duo1p      | X                    |                    |
| Dad1p/Spc34p     | X                    |                    |
| Dad3p/Spc34p     | X                    |                    |
| Dad3p/Dad4p      | X                    |                    |
| Dad4p/Spc34p     | X                    |                    |
| Dam1p/Duo1p      | X                    |                    |
| Dam1p/Spc19p     | X                    |                    |
| Dam1p/Spc34p     | X                    |                    |
| Duo1p/Spc34p     | X                    |                    |
| Spc19p/Spc34p    | X                    |                    |
| Ask1p/Dad2p      |                      | X                  |
| Ask1p/Dad4p      |                      | X                  |
| Ask1p/Hsk3p      |                      | X                  |
| Dad1p/Hsk3p      |                      | X                  |
| Dad2p/Hsk3p      |                      | X                  |
| Dad4p/Spc34p     |                      | X                  |
| Hsk3p/Spc34p     |                      | X                  |

**Supplementary Table 8: Relationships within the Dam1 complex that change in the presence versus the absence of microtubules.**

| Interaction Pair | Multiple cross-links       | Few/no cross-links | Multiple cross-links        | Few/no cross-links |
|------------------|----------------------------|--------------------|-----------------------------|--------------------|
|                  | In absence of microtubules |                    | In presence of microtubules |                    |
| Ask1p/Spc19p     |                            | X                  | X                           |                    |
| Ask1p/Spc34p     |                            | X                  | X                           |                    |
| Dad2p/Duo1p      | X                          |                    |                             | X                  |
| Dad3p/Duo1p      | X                          |                    |                             | X                  |
| Dad2p-C/N-Spc34p | X                          |                    |                             | X                  |
| Dad3p-C/Spc34p   | X                          |                    |                             | X                  |
| N-Duo1p/Spc19p   |                            | X                  | X                           |                    |
| Duo1p-C/N-Spc19p |                            | X                  | X                           |                    |

**Supplementary Table 9: Dam1 complex to tubulin cross-links found at 1% FDR.**

| Peptide 1 (position) | Peptide 2 (position)           | Protein 1 (position) | Protein 2 (position)                | Peptide Q-Value | Num PSMs |
|----------------------|--------------------------------|----------------------|-------------------------------------|-----------------|----------|
| WTKPTASSSR(3)        | TLKLTPTYGDLNHLVSATMSGVTTCLR(3) | Duo1p (236)          | $\beta$ -tubulin* (216)             | 0               | 7        |
| WTKPTASSSR(3)        | GDVVPKDVNAAIATIK(6)            | Duo1p (236)          | $\alpha$ -tubulin (326)             | 0               | 14       |
| WTKPTASSSR(3)        | MSMKEVDEQMLNVQNK(4)            | Duo1p (236)          | $\beta$ -tubulin* (324)             | 0               | 7        |
| LNNNTNSKLR(8)        | FDLMYAKR(7)                    | Dam1p (252)          | $\alpha$ -tubulin (401)             | 0.004           | 4        |
| KTHVPASK(1)          | VGINYQPPTVPPGGDLAKVQR(18)      | Duo1p (215)          | $\alpha$ -tubulin (370)             | 0.001           | 5        |
| KTHVPASK(1)          | FDLMYAKR(7)                    | Duo1p (215)          | $\alpha$ -tubulin (401)             | 0.001           | 25       |
| HSVAKK(5)            | FDLMYAKR(7)                    | Dam1p (330)          | $\alpha$ -tubulin (401)             | 0.006           | 4        |
| KSILHTIR(1)          | FDLMYAKR(7)                    | Dam1p (256)          | $\alpha$ -tubulin (401)             | 0               | 10       |
| WTKPTASSSR(3)        | FDLMYAKR(7)                    | Duo1p (236)          | $\alpha$ -tubulin (401)             | 0.001           | 8        |
| VVNGPVTKNR(8)        | FDLMYAKR(7)                    | Dam1p (307)          | $\alpha$ -tubulin (401)             | 0.006           | 11       |
| DAAPAKPPNQGLNPR(6)   | FDLMYAKR(7)                    | Duo1p (183)          | $\alpha$ -tubulin (401)             | 0.008           | 15       |
| ASQNKQFNQPLFSSQVR(5) | FDLMYAKR(7)                    | Dam1p (171)          | $\alpha$ -tubulin (401)             | 0.005           | 6        |
| VVNGPVTKNR(8)        | GDVVPKDVNAAIATIK(6)            | Dam1p (307)          | $\alpha$ -tubulin (326)             | 0.005           | 4        |
| KPTESR(1)            | FDLMYAKR(7)                    | Dam1p (320)          | $\alpha$ -tubulin (401)             | 0.006           | 2        |
| WTKPTASSSR(3)        | ALTVPELTQQMFDKNNMMAACDPR(15)   | Duo1p (236)          | $\beta$ -tubulin <sup>†</sup> (297) | 0               | 3        |
| DAAPAKPPNQGLNPR(6)   | GHYTIGKELIDLVLDR(7)            | Duo1p (183)          | $\alpha$ -tubulin (112)             | 0               | 7        |
| KPTESR(1)            | GHYTIGKEIIDLVLDR(7)            | Dam1p (320)          | $\alpha$ -tubulin (112)             | 0               | 4        |
| WTKPTASSSR(3)        | GHYTIGKEIIDLVLDR(7)            | Duo1p (236)          | $\alpha$ -tubulin (112)             | 0.005           | 1        |

|              |                                  |                |                                        |       |   |
|--------------|----------------------------------|----------------|----------------------------------------|-------|---|
| KSILHTIR(1)  | VGINYQPPTVVPGGDLAKVQR<br>(18)    | Dam1p<br>(256) | $\alpha$ -tubulin<br>(370)             | 0.005 | 1 |
| KINTRPPFR(1) | ALTVPELTQQMFDSKNMMA<br>ACDPR(15) | Dam1p<br>(335) | $\beta$ -tubulin <sup>†</sup><br>(297) | 0.001 | 1 |
| KTHVPASK(1)  | GHYTIGKEIIDLVLDLDR(7)            | Duo1p<br>(215) | $\alpha$ -tubulin<br>(112)             | 0.004 | 5 |

Tubulin accession numbers:  $\alpha$ -tubulin = gi|87578350;  $\beta$ -tubulin\* = gi|75773583;  $\beta$ -tubulin<sup>†</sup> = gi|116004471.

**Supplementary Table 10: Tubulin to tubulin cross-links found at 1% FDR.**

| Peptide 1 (position)             | Peptide 2 (position)            | Protein 1 (position)                | Protein 2 (position)                | Peptide Q-Value | Num PSMs | C $\alpha$ -C $\alpha$ distance |
|----------------------------------|---------------------------------|-------------------------------------|-------------------------------------|-----------------|----------|---------------------------------|
| GDVVPKDVNAAIATIK(6)              | TLKLTPTYGDLNHLVSATMSGVTTCLR(3)  | $\alpha$ -tubulin(326)              | $\beta$ -tubulin*(216)              | 0.001           | 12       | 13.3                            |
| QLFHPEQLITGKEDAA NNYAR(12)       | MSMKEVDEQMLNVQNK(4)             | $\alpha$ -tubulin(96)               | $\beta$ -tubulin*(324)              | 0               | 13       | 20.4                            |
| AYHEQLSVAEITNACFEPANQMVKCDPR(24) | MSMKEVDEQMLNVQNK(4)             | $\alpha$ -tubulin(304)              | $\beta$ -tubulin <sup>+</sup> (324) | 0               | 9        | 15.1                            |
| QLFHPEQLITGKEDAA NNYAR(12)       | GDVVPKDVNAAIATIK(6)             | $\alpha$ -tubulin(96)               | $\alpha$ -tubulin(326)              | 0               | 10       | 19.5                            |
| QLFHPEQLITGKEDAA NNYAR(12)       | EVDEQMLNVQNKNSYFVEWIPNNVK(12)   | $\alpha$ -tubulin(96)               | $\beta$ -tubulin*(336)              | 0               | 3        | 21.8                            |
| GLKMSATFIGNSTAIQELFK(3)          | INVYYNEAAGNKYVPR(12)            | $\beta$ -tubulin <sup>+</sup> (362) | $\beta$ -tubulin <sup>+</sup> (58)  | 0.001           | 3        | 15.0                            |
| QLFHPEQLITGKEDAA NNYAR(12)       | TLKLATPTYGDLNHLVSATMSGVTTSLR(3) | $\alpha$ -tubulin(96)               | $\beta$ -tubulin <sup>+</sup> (216) | 0.001           | 1        | 14.9                            |

Tubulin accession numbers:  $\alpha$ -tubulin = gi|87578350;  $\beta$ -tubulin\* = gi|75773583;  $\beta$ -tubulin<sup>+</sup> = gi|116004471.

**Supplementary Table 11: Fit of Dam1 complex to microtubule cross-links on the Dam1 complex models made from cross-linking data gathered in the presence or absence of microtubules.**

| Protein 1 (position)           | Protein 2 (position)    | distance between beads (Å)<br>minus MT model | distance between beads (Å)<br>plus MT model |
|--------------------------------|-------------------------|----------------------------------------------|---------------------------------------------|
| Dam1p (171)                    | $\alpha$ -tubulin (401) | 17.7                                         | 8.4                                         |
| Duo1p (183)                    | $\alpha$ -tubulin (112) | 10.4                                         | 4.0                                         |
| Duo1p (183)                    | $\alpha$ -tubulin (401) | 23.1                                         | -4.0                                        |
| Duo1p (215)                    | $\alpha$ -tubulin (112) | 3.3                                          | -3.8                                        |
| Duo1p (215)                    | $\alpha$ -tubulin (370) | 20.1                                         | 9.3                                         |
| Duo1p (215)                    | $\alpha$ -tubulin (401) | 8.9                                          | 5.4                                         |
| Duo1p (236)                    | $\alpha$ -tubulin (112) | 9.7                                          | 11.6                                        |
| Duo1p (236)                    | $\beta$ -tubulin (216)  | 27.5                                         | 17.1                                        |
| Duo1p (236)                    | $\beta$ -tubulin (297)  | 20.0                                         | 6.2                                         |
| Duo1p (236)                    | $\beta$ -tubulin (324)  | 12.0                                         | 6.8                                         |
| Duo1p (236)                    | $\alpha$ -tubulin (326) | 16.6                                         | 24.7                                        |
| Duo1p (236)                    | $\alpha$ -tubulin (401) | 2.96                                         | 3.0                                         |
| Dam1p (252)                    | $\alpha$ -tubulin (401) | 12.3                                         | 0.9                                         |
| Dam1p (256)                    | $\alpha$ -tubulin (370) | 27.2                                         | 20.1                                        |
| Dam1p (256)                    | $\alpha$ -tubulin (401) | 6.6                                          | 6.2                                         |
| Dam1p (307)                    | $\alpha$ -tubulin (326) | 19.4                                         | 12.1                                        |
| Dam1p (307)                    | $\alpha$ -tubulin (401) | 8.5                                          | 0.6                                         |
| Dam1p (320)                    | $\alpha$ -tubulin (112) | 27.3                                         | 7.5                                         |
| Dam1p (320)                    | $\alpha$ -tubulin (401) | 25.2                                         | 6.4                                         |
| Dam1p (330)                    | $\alpha$ -tubulin (401) | 22.2                                         | 4.7                                         |
| Dam1p (335)                    | $\beta$ -tubulin (297)  | 26.7                                         | 0.8                                         |
| <b>Overall fit to data (%)</b> |                         | <b>28.6</b>                                  | <b>76.2</b>                                 |

Minus values indicate a slight overlap in bead positions. Values 10 Å and under are regarded as a fit.



**Supplementary Table 12: Macro-regions of the Dam1 complex.**

| Protein name | Macro-region ID | Starting Residue | Ending Residue |
|--------------|-----------------|------------------|----------------|
| Ask1p        | 1 Ask1N         | 1                | 97             |
| Ask1p        | 2 Ask1M         | 98               | 194            |
| Ask1p        | 3 Ask1C         | 195              | 292            |
| Dad1p        | 1 Dad1          | 1                | 94             |
| Dad2p        | 1 Dad2          | 1                | 133            |
| Dad3p        | 1 Dad3          | 1                | 94             |
| Dad4p        | 1 Dad4          | 1                | 72             |
| Dam1p        | 1 Dam1N         | 1                | 114            |
| Dam1p        | 2 Dam1M         | 115              | 228            |
| Dam1p        | 3 Dam1C         | 229              | 343            |
| Duo1p        | 1 Duo1N         | 1                | 123            |
| Duo1p        | 2 Duo1C         | 124              | 247            |
| Hsk3p        | 1 Hsk3          | 1                | 69             |
| Spc19p       | 1 Spc19N        | 1                | 82             |
| Spc19p       | 2 Spc19C        | 83               | 165            |
| Spc34p       | 1 Spc34N        | 1                | 98             |
| Spc34p       | 2 Spc34M        | 99               | 196            |
| Spc34p       | 3 Spc34C        | 197              | 295            |

**Supplemental Table 13: A comparison of Dam1 complex interactions in the presence and absence of microtubules.** Data are presented as macro-regions as defined in Supplementary Table 11. Regions referred to in main text are highlighted in blue, lilac, green and grey. Each pair of beads, in a pair of macro-regions, with modeled bead surfaces within 8 Å counts as an interaction.

| macro-region A | macro-region B | Dam1 modeled minus MTs (v19) |                     |                      | Dam1 modeled plus MTs (v21) |                     |                      |
|----------------|----------------|------------------------------|---------------------|----------------------|-----------------------------|---------------------|----------------------|
|                |                | # cross-links                | # mono interactions | # dimer interactions | # cross-links               | # mono interactions | # dimer interactions |
| Ask1N          | Ask1N          | 4                            | 16                  | 0                    | 2                           | 8                   | 0                    |
| Ask1N          | Ask1M          | 0                            | 26                  | 0                    | 0                           | 14                  | 0                    |
| Ask1N          | Ask1C          | 1                            | 7                   | 1                    | 0                           | 6                   | 0                    |
| Ask1N          | Dad1           | 0                            | 3                   | 0                    | 0                           | 0                   | 0                    |
| Ask1N          | Dad2           | 2                            | 4                   | 0                    | 0                           | 1                   | 6                    |
| Ask1N          | Dad3           | 4                            | 5                   | 0                    | 1                           | 0                   | 1                    |
| Ask1N          | Dad4           | 1                            | 7                   | 0                    | 0                           | 0                   | 0                    |
| Ask1N          | Dam1N          | 1                            | 0                   | 0                    | 0                           | 1                   | 4                    |
| Ask1N          | Dam1M          | 3                            | 0                   | 20                   | 2                           | 0                   | 4                    |
| Ask1N          | Dam1C          | 3                            | 3                   | 4                    | 1                           | 0                   | 0                    |
| Ask1N          | Duo1N          | 2                            | 0                   | 0                    | 1                           | 0                   | 7                    |
| Ask1N          | Duo1C          | 1                            | 4                   | 4                    | 0                           | 0                   | 5                    |
| Ask1N          | Hsk3           | 1                            | 10                  | 0                    | 0                           | 0                   | 0                    |
| Ask1N          | Spc19N         | 0                            | 16                  | 0                    | 0                           | 1                   | 0                    |
| Ask1N          | Spc19C         | 0                            | 13                  | 0                    | 1                           | 16                  | 0                    |
| Ask1N          | Spc34N         | 0                            | 0                   | 6                    | 0                           | 0                   | 7                    |
| Ask1N          | Spc34M         | 0                            | 0                   | 1                    | 0                           | 0                   | 0                    |
| Ask1N          | Spc34C         | 0                            | 0                   | 4                    | 1                           | 0                   | 7                    |
| Ask1M          | Ask1M          | 0                            | 20                  | 0                    | 0                           | 22                  | 0                    |
| Ask1M          | Ask1C          | 3                            | 14                  | 0                    | 2                           | 13                  | 7                    |
| Ask1M          | Dad1           | 0                            | 0                   | 0                    | 1                           | 0                   | 9                    |
| Ask1M          | Dad2           | 0                            | 4                   | 0                    | 1                           | 1                   | 15                   |
| Ask1M          | Dad3           | 1                            | 1                   | 0                    | 2                           | 0                   | 2                    |
| Ask1M          | Dad4           | 1                            | 5                   | 0                    | 1                           | 0                   | 0                    |
| Ask1M          | Dam1N          | 0                            | 0                   | 0                    | 1                           | 0                   | 8                    |
| Ask1M          | Dam1M          | 1                            | 0                   | 3                    | 0                           | 0                   | 1                    |

|       |        |    |    |    |  |    |    |    |
|-------|--------|----|----|----|--|----|----|----|
| Ask1M | Dam1C  | 0  | 0  | 1  |  | 0  | 0  | 3  |
| Ask1M | Duo1N  | 0  | 0  | 0  |  | 1  | 0  | 2  |
| Ask1M | Duo1C  | 0  | 8  | 0  |  | 0  | 0  | 8  |
| Ask1M | Hsk3   | 0  | 4  | 0  |  | 0  | 0  | 0  |
| Ask1M | Spc19N | 0  | 17 | 0  |  | 0  | 5  | 0  |
| Ask1M | Spc19C | 0  | 2  | 0  |  | 1  | 5  | 0  |
| Ask1M | Spc34N | 0  | 0  | 1  |  | 1  | 0  | 3  |
| Ask1M | Spc34M | 0  | 0  | 0  |  | 0  | 0  | 0  |
| Ask1M | Spc34C | 0  | 0  | 0  |  | 1  | 0  | 8  |
| Ask1C | Ask1C  | 16 | 26 | 0  |  | 14 | 25 | 0  |
| Ask1C | Dad1   | 3  | 0  | 0  |  | 8  | 12 | 2  |
| Ask1C | Dad2   | 0  | 23 | 0  |  | 0  | 12 | 1  |
| Ask1C | Dad3   | 3  | 4  | 0  |  | 4  | 2  | 0  |
| Ask1C | Dad4   | 1  | 2  | 0  |  | 1  | 2  | 0  |
| Ask1C | Dam1N  | 0  | 0  | 0  |  | 2  | 10 | 1  |
| Ask1C | Dam1M  | 0  | 1  | 0  |  | 1  | 0  | 0  |
| Ask1C | Dam1C  | 1  | 0  | 0  |  | 1  | 1  | 3  |
| Ask1C | Duo1N  | 0  | 10 | 0  |  | 0  | 0  | 1  |
| Ask1C | Duo1C  | 2  | 33 | 0  |  | 1  | 0  | 11 |
| Ask1C | Hsk3   | 0  | 0  | 0  |  | 0  | 0  | 0  |
| Ask1C | Spc19N | 0  | 14 | 0  |  | 1  | 22 | 0  |
| Ask1C | Spc19C | 0  | 0  | 0  |  | 2  | 10 | 0  |
| Ask1C | Spc34N | 0  | 0  | 5  |  | 1  | 0  | 7  |
| Ask1C | Spc34M | 0  | 0  | 10 |  | 0  | 0  | 0  |
| Ask1C | Spc34C | 0  | 0  | 0  |  | 2  | 0  | 10 |
| Dad1  | Dad1   | 12 | 17 | 0  |  | 8  | 14 | 0  |
| Dad1  | Dad2   | 6  | 2  | 0  |  | 3  | 7  | 0  |
| Dad1  | Dad3   | 29 | 28 | 0  |  | 11 | 9  | 0  |
| Dad1  | Dad4   | 7  | 5  | 0  |  | 6  | 6  | 0  |
| Dad1  | Dam1N  | 6  | 3  | 0  |  | 6  | 6  | 0  |
| Dad1  | Dam1M  | 0  | 0  | 0  |  | 0  | 3  | 0  |
| Dad1  | Dam1C  | 2  | 12 | 0  |  | 1  | 15 | 0  |
| Dad1  | Duo1N  | 12 | 12 | 0  |  | 9  | 5  | 0  |
| Dad1  | Duo1C  | 9  | 7  | 0  |  | 3  | 6  | 0  |
| Dad1  | Hsk3   | 3  | 8  | 0  |  | 0  | 2  | 0  |
| Dad1  | Spc19N | 5  | 3  | 0  |  | 1  | 11 | 0  |

|      |        |    |    |    |  |    |    |    |
|------|--------|----|----|----|--|----|----|----|
| Dad1 | Spc19C | 2  | 20 | 0  |  | 2  | 0  | 0  |
| Dad1 | Spc34N | 6  | 0  | 17 |  | 4  | 1  | 3  |
| Dad1 | Spc34M | 5  | 0  | 6  |  | 6  | 0  | 1  |
| Dad1 | Spc34C | 4  | 0  | 13 |  | 6  | 2  | 0  |
| Dad2 | Dad2   | 6  | 25 | 0  |  | 3  | 17 | 0  |
| Dad2 | Dad3   | 11 | 11 | 0  |  | 2  | 11 | 0  |
| Dad2 | Dad4   | 5  | 4  | 0  |  | 2  | 2  | 0  |
| Dad2 | Dam1N  | 0  | 0  | 0  |  | 0  | 23 | 0  |
| Dad2 | Dam1M  | 1  | 2  | 0  |  | 2  | 0  | 0  |
| Dad2 | Dam1C  | 2  | 8  | 0  |  | 0  | 0  | 0  |
| Dad2 | Duo1N  | 3  | 13 | 0  |  | 0  | 5  | 0  |
| Dad2 | Duo1C  | 6  | 18 | 0  |  | 0  | 1  | 0  |
| Dad2 | Hsk3   | 2  | 2  | 0  |  | 0  | 0  | 0  |
| Dad2 | Spc19N | 5  | 15 | 0  |  | 3  | 3  | 0  |
| Dad2 | Spc19C | 0  | 0  | 0  |  | 2  | 4  | 3  |
| Dad2 | Spc34N | 3  | 0  | 8  |  | 0  | 2  | 9  |
| Dad2 | Spc34M | 0  | 0  | 30 |  | 0  | 0  | 5  |
| Dad2 | Spc34C | 0  | 0  | 0  |  | 1  | 1  | 1  |
| Dad3 | Dad3   | 23 | 21 | 0  |  | 10 | 13 | 0  |
| Dad3 | Dad4   | 12 | 8  | 0  |  | 8  | 8  | 0  |
| Dad3 | Dam1N  | 5  | 8  | 0  |  | 3  | 9  | 0  |
| Dad3 | Dam1M  | 2  | 2  | 0  |  | 0  | 14 | 0  |
| Dad3 | Dam1C  | 4  | 31 | 0  |  | 0  | 7  | 0  |
| Dad3 | Duo1N  | 15 | 24 | 0  |  | 6  | 22 | 0  |
| Dad3 | Duo1C  | 23 | 21 | 0  |  | 0  | 6  | 0  |
| Dad3 | Hsk3   | 7  | 8  | 0  |  | 2  | 2  | 0  |
| Dad3 | Spc19N | 9  | 11 | 0  |  | 1  | 3  | 0  |
| Dad3 | Spc19C | 2  | 12 | 0  |  | 3  | 0  | 0  |
| Dad3 | Spc34N | 10 | 0  | 33 |  | 11 | 1  | 17 |
| Dad3 | Spc34M | 8  | 0  | 14 |  | 6  | 0  | 16 |
| Dad3 | Spc34C | 2  | 0  | 4  |  | 2  | 6  | 0  |
| Dad4 | Dad4   | 3  | 9  | 0  |  | 3  | 8  | 0  |
| Dad4 | Dam1N  | 4  | 2  | 0  |  | 4  | 1  | 0  |
| Dad4 | Dam1M  | 0  | 5  | 0  |  | 0  | 11 | 0  |
| Dad4 | Dam1C  | 4  | 11 | 0  |  | 2  | 5  | 0  |
| Dad4 | Duo1N  | 2  | 6  | 0  |  | 2  | 1  | 0  |

|       |        |    |    |    |  |    |    |    |
|-------|--------|----|----|----|--|----|----|----|
| Dad4  | Duo1C  | 5  | 11 | 0  |  | 0  | 0  | 0  |
| Dad4  | Hsk3   | 4  | 24 | 0  |  | 2  | 7  | 0  |
| Dad4  | Spc19N | 3  | 15 | 0  |  | 0  | 6  | 0  |
| Dad4  | Spc19C | 0  | 2  | 0  |  | 2  | 1  | 0  |
| Dad4  | Spc34N | 2  | 0  | 3  |  | 0  | 0  | 8  |
| Dad4  | Spc34M | 0  | 0  | 1  |  | 0  | 0  | 11 |
| Dad4  | Spc34C | 2  | 0  | 2  |  | 0  | 1  | 0  |
| Dam1N | Dam1N  | 4  | 17 | 0  |  | 4  | 21 | 0  |
| Dam1N | Dam1M  | 0  | 3  | 0  |  | 0  | 1  | 0  |
| Dam1N | Dam1C  | 0  | 32 | 0  |  | 0  | 0  | 0  |
| Dam1N | Duo1N  | 7  | 33 | 0  |  | 4  | 31 | 0  |
| Dam1N | Duo1C  | 0  | 12 | 0  |  | 0  | 2  | 0  |
| Dam1N | Hsk3   | 0  | 3  | 0  |  | 0  | 0  | 0  |
| Dam1N | Spc19N | 2  | 1  | 0  |  | 4  | 1  | 0  |
| Dam1N | Spc19C | 0  | 0  | 7  |  | 1  | 0  | 1  |
| Dam1N | Spc34N | 3  | 5  | 2  |  | 5  | 2  | 0  |
| Dam1N | Spc34M | 0  | 0  | 1  |  | 0  | 0  | 3  |
| Dam1N | Spc34C | 0  | 13 | 0  |  | 0  | 1  | 0  |
| Dam1M | Dam1M  | 14 | 24 | 0  |  | 11 | 27 | 0  |
| Dam1M | Dam1C  | 17 | 24 | 0  |  | 13 | 27 | 0  |
| Dam1M | Duo1N  | 1  | 4  | 0  |  | 0  | 13 | 0  |
| Dam1M | Duo1C  | 33 | 40 | 0  |  | 26 | 21 | 0  |
| Dam1M | Hsk3   | 1  | 11 | 0  |  | 0  | 7  | 0  |
| Dam1M | Spc19N | 1  | 8  | 1  |  | 0  | 0  | 1  |
| Dam1M | Spc19C | 0  | 0  | 3  |  | 1  | 0  | 8  |
| Dam1M | Spc34N | 0  | 5  | 0  |  | 0  | 1  | 2  |
| Dam1M | Spc34M | 0  | 0  | 0  |  | 0  | 4  | 0  |
| Dam1M | Spc34C | 0  | 1  | 0  |  | 2  | 25 | 0  |
| Dam1C | Dam1C  | 18 | 25 | 0  |  | 16 | 26 | 0  |
| Dam1C | Duo1N  | 0  | 36 | 0  |  | 0  | 2  | 0  |
| Dam1C | Duo1C  | 18 | 44 | 0  |  | 19 | 55 | 0  |
| Dam1C | Hsk3   | 1  | 14 | 1  |  | 1  | 16 | 0  |
| Dam1C | Spc19N | 7  | 6  | 0  |  | 4  | 1  | 12 |
| Dam1C | Spc19C | 2  | 1  | 5  |  | 1  | 0  | 5  |
| Dam1C | Spc34N | 8  | 4  | 12 |  | 3  | 0  | 0  |
| Dam1C | Spc34M | 3  | 0  | 8  |  | 2  | 3  | 0  |

|        |        |    |    |    |  |    |    |    |
|--------|--------|----|----|----|--|----|----|----|
| Dam1C  | Spc34C | 9  | 1  | 0  |  | 5  | 10 | 0  |
| Duo1N  | Duo1N  | 10 | 29 | 0  |  | 4  | 28 | 0  |
| Duo1N  | Duo1C  | 3  | 31 | 0  |  | 0  | 11 | 0  |
| Duo1N  | Hsk3   | 1  | 6  | 0  |  | 0  | 0  | 0  |
| Duo1N  | Spc19N | 0  | 1  | 0  |  | 0  | 0  | 0  |
| Duo1N  | Spc19C | 0  | 1  | 1  |  | 3  | 0  | 0  |
| Duo1N  | Spc34N | 8  | 1  | 6  |  | 6  | 6  | 2  |
| Duo1N  | Spc34M | 1  | 0  | 5  |  | 0  | 1  | 3  |
| Duo1N  | Spc34C | 0  | 0  | 0  |  | 3  | 6  | 0  |
| Duo1C  | Duo1C  | 29 | 54 | 0  |  | 24 | 30 | 0  |
| Duo1C  | Hsk3   | 3  | 9  | 0  |  | 0  | 4  | 0  |
| Duo1C  | Spc19N | 6  | 18 | 0  |  | 3  | 0  | 19 |
| Duo1C  | Spc19C | 0  | 0  | 0  |  | 5  | 0  | 19 |
| Duo1C  | Spc34N | 4  | 6  | 4  |  | 1  | 10 | 0  |
| Duo1C  | Spc34M | 1  | 0  | 6  |  | 0  | 3  | 0  |
| Duo1C  | Spc34C | 2  | 0  | 0  |  | 8  | 25 | 0  |
| Hsk3   | Hsk3   | 3  | 12 | 0  |  | 2  | 7  | 0  |
| Hsk3   | Spc19N | 4  | 11 | 0  |  | 2  | 4  | 0  |
| Hsk3   | Spc19C | 0  | 9  | 0  |  | 0  | 0  | 0  |
| Hsk3   | Spc34N | 1  | 0  | 0  |  | 0  | 0  | 0  |
| Hsk3   | Spc34M | 0  | 0  | 0  |  | 0  | 0  | 0  |
| Hsk3   | Spc34C | 0  | 0  | 1  |  | 0  | 0  | 0  |
| Spc19N | Spc19N | 3  | 11 | 0  |  | 2  | 19 | 0  |
| Spc19N | Spc19C | 2  | 11 | 0  |  | 1  | 26 | 0  |
| Spc19N | Spc34N | 5  | 0  | 20 |  | 2  | 0  | 6  |
| Spc19N | Spc34M | 5  | 0  | 17 |  | 2  | 0  | 7  |
| Spc19N | Spc34C | 2  | 0  | 9  |  | 1  | 0  | 11 |
| Spc19C | Spc19C | 18 | 22 | 0  |  | 15 | 22 | 0  |
| Spc19C | Spc34N | 1  | 0  | 29 |  | 3  | 0  | 29 |
| Spc19C | Spc34M | 0  | 0  | 8  |  | 1  | 0  | 8  |
| Spc19C | Spc34C | 11 | 0  | 34 |  | 10 | 0  | 36 |
| Spc34N | Spc34N | 15 | 18 | 0  |  | 11 | 16 | 0  |
| Spc34N | Spc34M | 12 | 31 | 0  |  | 5  | 29 | 0  |
| Spc34N | Spc34C | 0  | 23 | 0  |  | 2  | 19 | 0  |
| Spc34M | Spc34M | 7  | 28 | 0  |  | 6  | 23 | 0  |
| Spc34M | Spc34C | 3  | 9  | 0  |  | 0  | 8  | 0  |

|                   |        |            |             |             |  |            |             |             |
|-------------------|--------|------------|-------------|-------------|--|------------|-------------|-------------|
| Spc34C            | Spc34C | 11         | 19          | 0           |  | 7          | 12          | 0           |
| <b>totals</b>     |        | <b>678</b> | <b>1475</b> | <b>371</b>  |  | <b>458</b> | <b>1083</b> | <b>389</b>  |
| <b>% of total</b> |        |            | <b>79.9</b> | <b>20.1</b> |  |            | <b>73.6</b> | <b>26.4</b> |

**Supplementary Table 14: Amino acid sequences of the proteins used in this paper.** All distance constraint location numbering is based on these sequences.

|                                                                                                                                                                                                                                                                                                                                                                                                                                                                                                                                                                                                                                                                                                                                                                                                                                                                                                                                             |
|---------------------------------------------------------------------------------------------------------------------------------------------------------------------------------------------------------------------------------------------------------------------------------------------------------------------------------------------------------------------------------------------------------------------------------------------------------------------------------------------------------------------------------------------------------------------------------------------------------------------------------------------------------------------------------------------------------------------------------------------------------------------------------------------------------------------------------------------------------------------------------------------------------------------------------------------|
| <p><b>BRCA1</b> (132 amino acids)</p> <p>MGSSHHHLHSSGXVPRGSHMDLSALRVEEVQNVINAMQKILECPICLELIKEPVSTKCDHIFCKFCMLKLLNQKKGPS<br/>QCPLCKNDITKRSLQESTRFSQLVEELLKIICAFQLDTGLEANSYNFAKKGK</p>                                                                                                                                                                                                                                                                                                                                                                                                                                                                                                                                                                                                                                                                                                                                                        |
| <p><b>BARD1</b> (115 amino acids)</p> <p>MEPDGRGAWAHSRAALDRLEKLLRCSRCTNILREPVCLGGCEHIFCSNVCSDCIGTGCPVCYTPAWIQDLKINRQLDSM<br/>IQLCSKLRNLLHDNELSDLKEDKPRKSLFNDAGNKK</p>                                                                                                                                                                                                                                                                                                                                                                                                                                                                                                                                                                                                                                                                                                                                                                       |
| <p><b>Fbx13</b> (430 amino acids)</p> <p>GSMKRGGGRSDRNSSEEGTAEKSKLRRTTNEHSQTCDWGNLLQDIILQVFKYLPDLLDRAHASQVCRNWNQVFHMPD<br/>LWRCFEFELNQPATSYLKATHPELIKQIKRHSNHLQYVSFKVDSSKESAEACDILSQLVNCSLKTLGLISTARPSFMDLPK<br/>SHFISALTVVFNKSLSSLKIDDPVDDPSLVLVANNSDTLKLKMSSCPHVSPAGILCVADQCHGLRELALNYHLLSDE<br/>LLLALSSEKHVRLEHLRIDVVSSENPQGQTHFHTIQKSSWDAFIRHSPKVNLMYFFLYEEEFDPFFRYEIPATHLYFGRSVSK<br/>DVLGRVGMTCPRLLVELVVCANGLRPLDEELIRIAERCKNLSAIGLGECEVSCSAFVEFVKMCGGRSLQSLIMEEVLPDQK<br/>YSLEQIHWEVSKHLGRVWFPDMMPTW</p>                                                                                                                                                                                                                                                                                                                                                                                                                             |
| <p><b>mCRY2 1-544</b> (544 amino acids)</p> <p>MAAAAVVAATVPAQSMGADGASSVHWFRKGLRLHDNPALLAAVRGARCVRVCYIILDPWFAASSSVGINRWRFLLQS<br/>LEDLDTSLRKLNSRFLVVRGQPADVFPRLFKEWGVTRLTFEYDSEPFGERDAAIMKMAKEAGVEVVTENSHTLYDLDR<br/>IIELNGQKPPLTYKRFQALISRMELPKKPAVAVSSQQMESCRAEIQENHDDTYGVPSLEELGFPTTEGLGPAVWQGGETE<br/>ALARLDKHLERKAWVANYERPRMNANSLLASPTGLSPYLRFGCLSCRLFYRLWDLYKKVCRNSTPPLSLFGQLLWREFF<br/>YTAATNPRFDRMEGNPICIQIPWDRNPEALAKWAEKGTGFPWIDAIMTQLRQEGWIHHLARHAVACFLTRGDLWV<br/>SWESGVRVFEDELLDADFSVNAGSWMWLSCSAFFQQFFHCYCPVGFGRRTDPSGDYIRRYLPKLGFPSPRYIYEPWNA<br/>PESVQKAACKIIGVDYPRPIVNHAEISRLNIERMKQIQQLSRYRGLCLLASVPSCVEDLSHPVAEPGSSQAGSIS</p>                                                                                                                                                                                                                                                                                             |
| <p><b>Skp1d</b> (149 amino acids)</p> <p>MPSIKLQSSDGEIFEVDVEIAKQSVTIKTMLEDLGMDPVPLPNVNAAILKKVIQWCTHHKDDPGGSGTDDIPVWDQEF<br/>LKVDQGTFLFELILAANYLDIKGLLDVTCKTVANMIKGTPEEIRKTFNIKNDFTEEEEAQVRKENQWCEEK</p>                                                                                                                                                                                                                                                                                                                                                                                                                                                                                                                                                                                                                                                                                                                                     |
| <p><b>Spc97p</b> (823 amino acids)</p> <p>MEIKEVDDRAELRYTNNIPLLGKLVNHQPLWSTNPKLKSFSLEKISAPDQRRVQEALVVKDLLNVLIGLEGTYIRYFNDY<br/>EPSPETPIEFKIAKKMDPSFKTFSRRIVRYGKQYMLTRAYEKWSDTSFGMVLQRFAYEIRRFLQVYKTLVERLERDFN<br/>KVPNFSIRELEQIINETEVNKQMELLYNIYEEIFREIEERTNQSSQEDFNNFMDSMKNESSLHLRLMVAFDTTVYPVPGK<br/>GAILKIFQQKILENLGDRSSVMFLKLLNNSQDYCTMLYEWLTQGILNDPYQEFMTYDDLEGKTDNIFDTRDRAWDTQ<br/>YFIRKDVLLRDCDSEEDKNLLFKMLRTGILLKVVASLQIPTIPSNSSDITIQEINDFADLMEGSNLELYVDKCYSRANEIFLK<br/>LFFQGYDLINVLKHLQQIFLGYQSGHNVLKFLTKNMGELTKHYRNDNNANYDKLLQNFELERQSENPNLMLRQLLMIQ<br/>FDTETLPQVLSHYLQIYPEVPENNSANDSDPLMHANNFKNMNAILFDELSKERTGAYHGSNLELYTPKSAIYHLKFDINI<br/>PYPLNIIISRTCMIKYQILRYQLVLQYHSRLLEDETWMDLNKTPSWKYRGYSHTVKRRIVRATRVLHAKMNHFIKTIMEYF<br/>NQNVIDKEVYSLEKCYRNPTLAVAIQNELEGGLTNIMTNRCLSDLIPLQLQIFDIVYKFKFIKSMRAKLCQLDPVLYEKHK<br/>SGMMKTLNEGRTNNGGQEDVGYQEDAALIELIQKLIYEISNASSIFRKCLINFTQELSTEFDFYDSSSVDAAGIERVLYSI<br/>VPPRSASASSQR</p> |
| <p><b>Spc98p</b> (846 amino acids)</p> <p>MELEPTLFGIIEALAPQLLSQSHLQTFVSDVVNLLRSSTKSATQLGPLIDFYKQLQSLDSPETTMMWHKIEKFLDALFGIQNT<br/>DDMVKYLVSFQSLPSNYRAKIVQKSSGLNMENLANHEHLLSPVRAPSIYTEASFENMDRFSERRSMVSSPNRYVPSST<br/>YSSVTLRQLSNPYVNTIPEEDILKYVSYTLTATTSALFPFDHEQIQIPSKIPNFESGLLHLIFEAGLLYQSLGYKVEKFRMLNI<br/>SPMKKALIIIESELQNYTAFVNNLVSSGTVVSLKSLYREIYENIIRLRIYCRFTEHLEELSGDTFLIELNIFKSHGDLTIRKIATN</p>                                                                                                                                                                                                                                                                                                                                                                                                                                                                                                                                    |



LFNSMISLYEYLMNWLTKGLLRATYGEFFIAENTDTNGTDDDDFIYHIPIEFNQERVPAFIPKELAYKIFMIGKSYIFLEKYC  
KEVQWTNEFSKKYHVLYQNSYRGISTNFFEIINDQYSEIVNHTNQILNQKFHYRDVVFALKNILLMGKSDFMDALIEKA  
NDILATPSDSLPNYKLRVQLQEAQVQLSSLRHLMNSPRNSSVINGLDARVLDLGHGSVGWDVFTLDYILYPPSLVNLVNR  
PFGRKEYLRIFNFLWRFKKNYFYQKEMLKSNDIIRSFKKIRGYNPLIRDIINKLSRISILRTQFQQFNSKMESYLNCHIEEN  
FKEMTRKLRQRTENKSQNFQDLIRLNNGTIELNGILTPKAEVLTSSSSKPKQKHAIEKTLNIDELESVHNTFLTNILSHKLFAT  
NTSEISVGDYSGQPYPTSLVLLNSVYEFVKVYCNLNDIGYEIFIKMNLNDHEASNGLLGKFNTNLKEIVSQYKNFKDRLYI  
FRADLKNKGDEELFLLSKSLR

**His-TEV-Tub4** (506 amino acids)

MHHHHHHGKPIPNPLGLDSTENLYFQGIDPFTMGGEIITLQAGQCNGNHVKGFLWSQLAKEHAIGTDGLSQLPDSSTE  
RDDDTKPFRENSRNKFTPRAIMMDSEPSVIADVENTFRGFFDPRNTWVASDGASAGNSWANGYDIGTRNQDDILN  
KIDKEIDSTDNFEGFQLLHVSAGGTGSGLGSNLLALCDRYPKILTTSVFPARSEVVVQSYNTILALRRRIEDSDATVVF  
DNASLLNISGKVFERNPIDLQHTNQLISTIISVNTSIRFPSYMYSSMSSIYSTLIPSELHFLSPSFTPFTSDYIHDDIAHKGH  
SSYDVMLDLLDPSNSLVSTAMNNPTYFNVYNTIIGNVPRQISRAMTKLQQRKFPSSWSSAMHVNIGRRSPYLPQP  
ENEVSGMMLSNMSTVVNVFENACNTFDKVFAGAFNNYVVGDLFQSMQNVQDEFAESREVVQSLMEDYVAAEQ  
DSYLDVLDVDDENMVGEEEDLDADGDHKL

**Ask1p** (292 amino acids)

MDSASKEETLEKLDQEITVNLQKIDSNLSFCFHKITQDIIPHVATYSEICERIMDSTEWLGTMFQETGLVNLQANAAAPV  
GNAPVKSLVSNVGIPTSAEEASRQSQTNDGNPNEADSAVHVNRDVHSMFNNDSIDDFHTANITSTGQILKLPDSSDE  
DTGSEAVPSREQDLDGEGHGGADDEQDESTIQRQSRKRKISLLQQQYGSSSMVPSPIVPNKMRKQLAHEEHINND  
GDNDDESNNISSPLKQGHHPKQGQADDNNEGPDEEESTKEVPKPGTIIHFSTNR

**Dad1p** (94 amino acids)

MMASTSNDEEKLISTTDKYFIEQRNIVLQEINETMNSILNGLNGLNISLESSIAVGREFQSVSDLWKTLYDGLLESLSDEAPI  
DEQPTLSQSKTK

**Dad2p** (133 amino acids)

MDSIDEQIAIKRKEQLSLQKITSLTDGLKIQIQLIELNEQIKEMGMNADSVQALMNNWDSIINNISQASLGLLQYAEGDYEI  
GPWKDSKKNESQNETGLEAQENDKNDENDEDEDLVPLPETMVRIRVDGNE

**Dad3p** (94 amino acids)

MEHNLSPLQQEVLDKYKQLSLDLKALDETIKELNYSQHRQQHSQQQETVSPDEILQEMRDIEVKIGLVGTLLKGSVYSLILQ  
RKQEQESLGSNSK

**Dad4p** (72 amino acids)

MENPHEQVQANILSRIIGNVKRLNESVAILNQELVTINNRNKNLEIMGAICDNYHSSVQFNLEATNKKPPL

**Dam1p** (343 amino acids)

MSEDKAKLGTTRSATEYRLSIGSAPTSRRSSMGESSLMKFADQEGLTSSVGEYNTIQQLLLPIRELSDSIITLDSNFTR  
LNFIHESLADLNESLGSLLYGIMSNWCVEFSQAPHDIQDDLIAIKQLKSLEDEKNNLVMELSNMERICRKKDEQGEN  
LAKASQNKQFNQPLFPSSQVRKYRSYDNRDKRKPISKIGNNLQVENEEDYEDDTSSEASFVLPNTNIGMSKSSQGHVTKT  
TRLNNTNSKLRRSILHTIRNSIASGADLPIENDNVVNLGDLHPNNRISLGSGAARVVNGPVTKNRNSMFSGRAERKP  
TESRHSVAKKTEKKINTRPPFR

**Duo1p** (247 amino acids)

MSEQSQLDDSTIDKLIPQIFNEMRNLNNTTNKFKPKSTGGGASDNISANSNSIRSFNSITTSQLLKESESLDKITAMIKNVT  
AALKNNLPVYVNVQVHEVCKSTNSILDSWINIHSQAGYIHKLMSDQTYLKLINDRLHNENVNTNDEEDGSTLHNVIALLKKK  
EILDRLQKLENRKGKDAAPAKPPNQGLNPRYGVQSGRRPVPSAGISNNGRVRKTHVPASKRPSGIPRVTVNRWTKPTA  
SSSRKMF

**Hsk3p** (69 amino acids)

MNANKQRQYNQLAHELRELQTNLQETTKQLDIMSKQCENENLVGQLGKVHGSWLGISYIYYMEQMLGKTQ

**Spc19p** (165 amino acids)

MTDALEQSVLALLEGTVSVLKDSVESLKCANEPTNLASTMLQTKRVFRLVPEYDVERSKLDLIEEVEPLVRTLGDKLRKSM  
GRMQRELDTLQQTYELNDRLLKKNISMDDDDALNSPDMGQEYEGRDADDVMMASSTNEELEELKLLKEKKKQLEN  
KLEILKQK

**Spc34(-His)** (301 amino acids)

MGESLDRCIDDIRAVDSMSTLYFKPPGIFHNAILQGASNKASIRKDITRLIKDCNHDEAYLLFKVNPEKQSVSRRDGKEG  
VFDYVIKRDMDKRNRRRLGRPGEKPIIHVPKEVYLNKDRDLNKRRTATTSGGGLNGFIFDLDLIGSSVISNSSSGTFK  
ALS AVFKDDPQIQRLLYALENGSVLMEESNNQRRKTIFVEDFPTDLILKVM AEVTDLWPLTEFKQDYDQLYHNYEQLSS  
KLRFIKKEVLLQDDRLLKMSQYHPSSSHDVAKIIRKEKDEIRRLEMEIANLQEHHHHHH

**gi|87578350 (Tubulin, alpha 3d [Bos taurus])** (452 amino acids)

MRECISVHVGQAGVQIGNACWELYCLEHGIQPDGQMPSDKTIGGGDSFNTFFSETGAGKHVPRAVFDLEPTVIDE  
VRTGTYRQLFHPEQLITGKEDAANNYARGHYTIGKELIDLVLDRIRKLADQCTGLQGFLIFHSFGGGTGSFGTSLMERLS  
VDYGGKSKLEFSIYPAPQVSTAVVEPYNSILTHTTLEHSDCAFMDNEAIYDICRRNLDIERPTYTNLNLIGQIVSSITASL  
RFDGALNVDLTEFQTNLVPYPRIFPLATYAPVISA EKAYHEQLSVAEITNACFEPANQMVKCDPRHGKYM ACCLLYRG  
DVVPKDVNAAIATIKRTIQFVDWCPTGFKVGINYQPPTVVPGGDLAKVQRAVCMLSNTTAAIEAWARLDHKFDLM  
YAKRAFVHWYVGE GMEEGEFSEAREDMAALEKDYE EVGMDSVEGEGEEEEEGDEY

**gi|312597141 (tubulin beta-chain [Bos taurus])** (427 amino acids)

MREIVHIQAGQCGNQIGAKFWEVISDEHGIDPTGSYHGSDQLQLERINVYYNEAAGNKYVPRAILVDLEPGTMDSVRS  
GPFQGFIRPDNFVFGQSGAGNNWAKGHYTEGAELVDSVLDVVRKESESCDCLQGFQLTHSLGGGTGSGMGTLLISKIR  
E EYPDRIMNTFSVVPSPKVS DTVVEPYNATLSVHQLVENTDETYCIDNEALYDICFRTLKLTPTYGDLNHLVSATMSGVT  
TCLRFPQGQLNADLRKLAVNMVFPRLHFFMPGFAPLTSRGSQQYRALTVP ELTQQMFDAKNMMAACDPRHGRYLTV  
AAVFRGRMSMKEVDEQMLNVQNKNSSYFVEWIPNNVKTAVCDIPRGLKMSATFIGNSTAIQELFKRISEQFTAMFR  
RKAFLHWYTGEGMDEMEFTEAESNMNDLVSEYQQYQD

**gi|116004471 (tubulin beta-3 chain [Bos taurus])** (450 amino acids)

MREIVHIQAGQCGNQIGAKFWEVISDEHGIDPSGNYVGSDQLQLERISVYYNEASSHKYVPRAILVDLEP  
GTMDSVRSGAFGHFRPDNFIFGQSGAGNNWAKGHYTEGAELVDSVLDVVRKECENCDCLOQGFQLTHSLG  
GGTGSGMGTLLISKVREEYPDRIMNTFSVVPSPKVS DTVVEPYNATLSIHLVENTDETYCIDNEALYDI  
CFRTLKLATPTYGDLNHLVSATMSGVTSLRFPQGQLNADLRKLAVNMVFPRLHFFMPGFAPLTARGSQQ  
YRALTVP ELTQQMFDAKNMMAACDPRHGRYLTVATVFRGRMSMKEVDEQMLAIQSKNSSYFVEWIPNNVKVAVCD  
IPRGLKMSSTFIGNSTAIQELFKRISEQFTAMFRRKAFLHWYTGEGMDEMEFTEAESNMNDLVS  
EYQQYQDATAEEEGEMYEDDEESEAQGPK

**gi|75773583 (tubulin, beta 2C [Bos taurus])** (450 amino acids)

MREIVHIQAGQCGNQIGAKFWEVISDEHGIDPSGNYVGSDQLQLERISVYYNEASSHKYVPRAILVDLEP  
GTMDSVRSGAFGHFRPDNFIFGQSGAGNNWAKGHYTEGAELVDSVLDVVRKECENCDCLOQGFQLTHSLG  
GGTGSGMGTLLISKVREEYPDRIMNTFSVVPSPKVS DTVVEPYNATLSIHLVENTDETYCIDNEALYDI  
CFRTLKLATPTYGDLNHLVSATMSGVTSLRFPQGQLNADLRKLAVNMVFPRLHFFMPGFAPLTARGSQQ  
YRALTVP ELTQQMFDAKNMMAACDPRHGRYLTVATVFRGRMSMKEVDEQMLAIQSKNSSYFVEWIPNNVKVAVCD  
IPRGLKMSSTFIGNSTAIQELFKRISEQFTAMFRRKAFLHWYTGEGMDEMEFTEAESNMNDLVS

EYQQYQDATAEEEGEMYEDDEEESEAQGPK

**Supplementary Table 15: The percentage of SCF<sup>FBXL3</sup> cross-linking data that fits equivalent distance cutoffs at course-grained and atomic resolutions.** Course-grained cutoffs represent the distance between the surfaces of the two beads containing the cross-linked residues. Atomic cutoffs refer to the C $\alpha$ -C $\alpha$  distance of the cross-linked lysines.

|                                   |        |                |        |                |        |                |
|-----------------------------------|--------|----------------|--------|----------------|--------|----------------|
| Distance restraints within cutoff | 86%    |                | 91%    |                | 95%    |                |
| Structural representation         | atomic | course-grained | atomic | course-grained | atomic | course-grained |
| Cutoff (Å)                        | 21     | 5              | 30     | 8              | 31     | 10             |

### Supplementary Notes:

**Supplementary Note 1: Cooperative binding models by Hill, McGhee and von Hippel are unable to distinguish changes in cooperativity from direct binding of the Dam1 complex to microtubules in bulk binding assays.**

Previous work from our lab used bulk binding assays<sup>8,9</sup> to define how Aurora B phosphorylation of the Dam1 complex inhibits its ability to bind microtubules. The Dam1 complex binds microtubules in a highly cooperative manner and thus the apparent affinity represents a combination of two factors: direct interaction between an individual Dam1 complex and the microtubule, and the interaction between two or more adjacent Dam1 complexes (oligomerization). In an attempt to separate the contributions of these two factors to the apparent affinity, we fit our data to cooperative binding models<sup>10,11</sup>. However, our new data presented here indicate that these models were unable to distinguish changes in cooperativity from direct binding in this case. We attribute this to the fact that neither model accurately describes the microtubule as a substrate, in which the ligand binding sites are present in linear repeating units (protofilaments) that form a closed tube. This arrangement introduces an extra dimension that is not accounted for in the closest approximation, as described in the McGhee & von Hippel model, for protein binding to a linear DNA substrate.

## Supplementary Methods:

**Electron Microscopy.** Dam1 complex on microtubules was produced and cross-linked exactly as described above in the cross-linking section except that after quenching, the reaction was diluted 21-fold with warm BRB80 containing 10  $\mu$ M taxol. Carbon-coated copper grids were positively charged in a glow discharge device (Electron Microscopy Sciences) for 2 min. A 2  $\mu$ l drop of sample was applied onto a freshly discharged grid and incubated for 20 s. Excess solution was blotted off, and the grid washed twice with BRB80 before staining with 2% uranyl acetate. Stain was blotted off, and the grid was air dried. Samples were viewed on a transmission electron microscope (Morgagni; FEI) operating at 100 kV. Images were recorded on a 1,000 x 1,000 bottom-mount slow-scan charge-coupled device camera (Gatan) at a nominal magnification 22,000x at the specimen level.

**Kojak Search Parameters.** Cross-linked peptides were identified using the Kojak version 1.0 cross-link identification software<sup>6</sup> following the author's instructions (<http://www.kojak-ms.org>) and using the search parameters listed below. Parameters marked [varies] were specific to each MS file searched. The exact Kojak search parameters used for each raw MS data file are available to download, along with the raw MS data at: <http://proxl.yeastrc.org/dam1-zelter-2015>.

```
# Kojak version 1.0 Search Parameters
# Data input files: include full path if not in current working directory
database           =      searchDatabase.fasta [varies]
MS_data_file       =      MS_data.mzML [varies]
output_file        =      KojakOutPutFileName.txt [varies]
percolator_file    =      KojakOutputExportedForPercolatorInput.txt [varies]
# Parameters used to described the data being input to Kojak
instrument          =      0          #0=Orbitrap, 1=FTICR
MS1_centroid        =      0          #0=no, 1=yes
MS2_centroid        =      0          #0=no, 1=yes [varies]
MS1_resolution      =      50000     #Resolution at 400 m/z [varies]
MS2_resolution      =      25000     #Resolution at 400 m/z [varies]
enrichment          =      0          #Values between 0 and 1 to describe 180 APE [varies]
# Cross-link and mono-link masses allowed. May have more than one of each parameter.
cross_link_mass     =      138.0680742
mono_link_mass      =      155.0946
mono_link_mass      =      156.0786
# Fixed modifications
fixed_modification  =      C 57.02146
# Differential modifications. @ = N-terminus
max_mods_per_peptide =      2
modification        =      K          14.015894
modification        =      K          28.031788
modification        =      K          42.047682
modification        =      M          15.9949
modification        =      @          42.01055
# Parameters used in Kojak analysis
```

```

prefer_precursor_pred = 1 # 1=on, 0=off. [varies]
decoy_filter = random #identifier for all decoys in the database
max_miscleavages = 6 #number of missed trypsin cleavages allowed
max_peptide_mass = 10000.0 #largest allowed peptide mass in Daltons
min_peptide_mass = 600.0 #lowest allowed peptide mass in Daltons
max_spectrum_peaks = 500 #top N peaks to use during analysis. 0 uses all peaks
ppm_tolerance_pre = 25.0 #mass tolerance on precursor when searching
ppm_tolerance_frag = 10.0 #mass tolerance when scoring fragment ions
search_dimers = 1 #0=no, 1=yes
relaxed_analysis = 1 #0=no, 1=yes
top_count = 500 #number top scoring peptides combined in relaxed analysis
spectrum_processing = 1 #0=no, 1=yes
use_comet_xcorr = 1 #0=no, 1=yes

```

**Statistical validation of Kojak results.** PSMs automatically exported from Kojak<sup>6</sup> in tab-delimited text format were input into Percolator<sup>1</sup> (version 2.08) for statistical validation. The filename of this automatically exported Percolator input file is defined by the Kojak parameter, `percolator_file`, listed in the Kojak search parameters above. Percolator is a semi-supervised algorithm that assigns a statistically meaningful  $q$  value to each PSM through analysis of the target and decoy PSM distributions. Decoy PSMs derive from peptide sequences known to be false. In the current work the target databases consisted of all proteins identified in the sample analyzed (see Materials and Methods), while the decoy databases consisted of the corresponding set of reversed protein sequences. Cross-link PSMs were considered to be false if at least one of the peptides was from a decoy protein sequence. The top scoring PSM for each spectrum was used as input to Percolator. The following scoring metrics were used as parameters for Percolator.

Score: PSM score reported by Kojak

dScore: difference in score between the PSM and the next best match for that spectrum

NormRank: summed rank of the two peptides in the top scoring list

Charge: charge state of the precursor ion

Mass: mass (in Daltons) of the precursor ion

PPM: mass difference between observed precursor ion mass and PSM, in parts per million

LenShort: length of the short peptide sequence

LenLong: length of the long peptide sequence

Dimer: Is the PSM a non-covalent dimer of two peptides? (1=yes, 0=no)

Mono: Is the PSM a mono-linked peptide? (1=yes, 0=no)

Loop: Is the PSM a loop-linked peptide? (1=yes, 0=no)

Cross: Is the PSM two cross-linked peptides? (1=yes, 0=no)

Percolator was run on the Kojak produced file for input into percolator using the command:

```
percolator -X output.xml -j KojakOutputExportedForPercolatorInput.txt >./percout.txt
```

The data presented in this paper was filtered to show only hits to the target proteins that had a Percolator assigned peptide level  $q$  value  $\leq 0.01$ . The complete, unfiltered list of all PSMs and their Percolator assigned  $q$  values is available at: <http://proxl.yeastrc.org/dam1-zelter-2015>

### Supplementary References:

1. Kall L, Canterbury JD, Weston J, Noble WS, MacCoss MJ. Semi-supervised learning for peptide identification from shotgun proteomics datasets. *Nat Methods* **4**, 923-925 (2007).
2. Leitner A, *et al.* The molecular architecture of the eukaryotic chaperonin TRiC/CCT. *Structure* **20**, 814-825 (2012).
3. Yang B, *et al.* Identification of cross-linked peptides from complex samples. *Nat Methods* **9**, 904-906 (2012).
4. Chen ZA, *et al.* Architecture of the RNA polymerase II-TFIIF complex revealed by cross-linking and mass spectrometry. *The EMBO journal* **29**, 717-726 (2010).
5. Jennebach S, Herzog F, Aebersold R, Cramer P. Crosslinking-MS analysis reveals RNA polymerase I domain architecture and basis of rRNA cleavage. *Nucleic acids research* **40**, 5591-5601 (2012).
6. Hoopmann MR, *et al.* Kojak: Efficient analysis of chemically cross-linked protein complexes. *J Proteome Res* **15**, 2190-2198 (2015).
7. Tien JF, *et al.* Kinetochore biorientation in *Saccharomyces cerevisiae* requires a tightly folded conformation of the Ndc80 complex. *Genetics* **198**, 1483-1493 (2014).
8. Gestaut DR, *et al.* Phosphoregulation and depolymerization-driven movement of the Dam1 complex do not require ring formation. *Nature cell biology* **10**, 407-414 (2008).
9. Graczyk B, Davis TN. An assay to measure the affinity of proteins for microtubules by quantitative fluorescent microscopy. *Analytical biochemistry* **410**, 313-315 (2011).
10. Hill AV. The possible effects of the aggregation of the molecules of haemoglobin on its dissociation curves. *J Physiol* **40**, iv-vii (1910).
11. McGhee JD, von Hippel PH. Theoretical aspects of DNA-protein interactions: co-operative and non-co-operative binding of large ligands to a one-dimensional homogeneous lattice. *Journal of molecular biology* **86**, 469-489 (1974).
